# Supplementary material
Source: publisher site journal article supplement (http://static.cambridge.org/content/id/urn:cambridge.org:id:article:S0016756819000244/resource/name/S0016756819000244supp004.xlsx)
Supplement: Supplementary file 1 [file S0016756819000244supp004.xlsx]

## Sheet: Sample List
No.	GPS		Depth(m)
	E	N
1	109°30'	34°45'	23.46-25.19
2	109°30'	34°45'	143.54-146.16
3	109°30'	34°45'	172.52-174.34
4	109°30'	34°45'	262.35-267.5
5	109°30'	34°45'	401.02-402.29
6	109°30'	34°45'	431.22-432.3
7	109°30'	34°45'	544.47-546.76

## Sheet: Sample1
Analysis	Ratios								Ages								Discordance (%)	Best Age (Ma)
	207Pb/235U		206Pb/238U		208Pb/232Th		207Pb/206Pb		207Pb/235U		206Pb/238U		208Pb/232Th		207Pb/206Pb
		2 s.e.		2 s.e.		2 s.e.		2 s.e.		2 s.e.		2 s.e.		2 s.e.		2 s.e.			2 s.e.
LYH22-20	0.164	0.044	0.0235	0.0011	0.0078	0.0013	0.05	0.013	149	38	149.4	6.7	157	26	110	43	0.3	149.4	6.7
LYH22-52	0.272	0.063	0.0342	0.0021	0.0114	0.0022	0.056	0.014	216	48	216	13	227	43	130	39	0	216	13
LYH22-66	0.236	0.032	0.0343	0.0014	0.0116	0.0017	0.048	0.0067	214	26	217.5	8.4	232	33	210	25	1.6	217.5	8.4
LYH22-6	0.269	0.016	0.03779	0.00059	0.01198	0.00044	0.0518	0.003	242	12	239.1	3.7	240.5	8.7	280	11	1.2	239.1	3.7
LYH22-116	0.263	0.029	0.0381	0.0013	0.012	0.0014	0.0482	0.0057	240	23	240.9	7.9	240	28	160	22	0.4	240.9	7.9
LYH22-13	0.278	0.015	0.03963	0.00048	0.0125	0.0005	0.0512	0.0026	249	12	250.5	3	251	10	211	9.8	0.6	250.5	3
LYH22-23	0.292	0.026	0.04039	0.00094	0.01273	0.00094	0.0508	0.0046	252	20	255.7	5.9	255	19	160	16	1.4	255.7	5.9
LYH22-49	0.291	0.033	0.0424	0.0015	0.014	0.001	0.0506	0.006	266	26	267.5	9.4	281	20	270	21	0.6	267.5	9.4
LYH22-113	0.323	0.035	0.0429	0.0014	0.01563	0.00096	0.0543	0.0059	274	27	270.8	8.5	313	19	300	20	1.2	270.8	8.5
LYH22-17	0.309	0.022	0.04301	0.00076	0.01347	0.00067	0.0519	0.0036	272	17	272	4.6	270	13	250	13	0	272	4.6
LYH22-15	0.328	0.068	0.0433	0.0017	0.0124	0.0016	0.053	0.011	275	51	273	10	250	33	230	37	0.7	273	10
LYH22-90	0.316	0.026	0.0444	0.0011	0.0143	0.001	0.0539	0.0046	277	21	280.1	6.7	287	20	270	16	1.1	280.1	6.7
LYH22-11	0.321	0.018	0.04452	0.00065	0.01396	0.00067	0.0532	0.0029	284	13	280.7	4	280	13	300	10	1.2	280.7	4
LYH22-102	0.324	0.039	0.0449	0.0017	0.0133	0.0016	0.0533	0.0066	285	30	283	10	266	32	270	22	0.7	283	10
LYH22-43	0.326	0.051	0.0451	0.0017	0.0149	0.0015	0.0539	0.0083	285	37	284	10	299	31	350	29	0.4	284	10
LYH22-63	0.329	0.039	0.0454	0.0012	0.01597	0.00092	0.0533	0.0063	287	30	286.2	7.5	320	18	240	21	0.3	286.2	7.5
LYH22-72	0.333	0.019	0.04577	0.00068	0.01446	0.00087	0.0532	0.0032	292	15	288.5	4.2	290	17	320	11	1.2	288.5	4.2
LYH22-108	0.325	0.028	0.0462	0.0015	0.0148	0.0038	0.0532	0.005	291	22	291.1	9.3	294	75	320	18	0	291.1	9.3
LYH22-78	0.345	0.033	0.0469	0.0012	0.0158	0.0013	0.0526	0.0052	291	25	295.3	7.4	317	25	200	17	1.5	295.3	7.4
LYH22-22	0.336	0.019	0.04748	0.00063	0.01588	0.00066	0.0519	0.0028	299	15	299.4	3.9	318	13	240	10	0.1	299.4	3.9
LYH22-120	0.375	0.04	0.0495	0.0017	0.0175	0.0018	0.0558	0.0063	308	29	311	10	349	36	260	20	1	311	10
LYH22-14	0.368	0.03	0.0495	0.0011	0.01631	0.00083	0.0546	0.0047	310	22	311.1	6.9	327	17	250	15	0.4	311.1	6.9
LYH22-33	0.381	0.028	0.0523	0.001	0.0194	0.0014	0.0544	0.0042	327	21	329.3	6.3	391	27	340	15	0.7	329.3	6.3
LYH22-100	0.399	0.033	0.0532	0.0014	0.0162	0.0013	0.0549	0.0046	336	24	334.2	8.4	325	25	330	17	0.5	334.2	8.4
LYH22-107	0.394	0.067	0.0535	0.0041	0.018	0.0037	0.0527	0.0092	331	50	335	25	360	74	260	35	1.2	335	25
LYH22-86	0.424	0.031	0.0562	0.0011	0.0189	0.0013	0.0559	0.0042	350	22	353.4	6.7	379	26	350	15	1	353.4	6.7
LYH22-109	0.45	0.048	0.0621	0.0025	0.0185	0.0021	0.0536	0.0058	386	30	388	15	369	41	430	19	0.5	388	15
LYH22-54	0.482	0.032	0.0634	0.0012	0.0208	0.0013	0.0555	0.0039	394	22	397	7.3	416	25	360	14	0.8	397	7.3
LYH22-112	0.49	0.045	0.0643	0.002	0.0182	0.0017	0.0567	0.005	399	31	402	12	364	33	400	18	0.7	402	12
LYH22-91	0.512	0.031	0.0676	0.0017	0.0221	0.002	0.0548	0.0037	420	20	422	10	441	39	360	14	0.5	422	10
LYH22-83	0.509	0.026	0.06786	0.00091	0.02181	0.0007	0.0531	0.0026	420	18	423.2	5.5	436	14	340	10	0.8	423.2	5.5
LYH22-32	0.527	0.049	0.068	0.002	0.0215	0.002	0.0556	0.0041	427	33	424	12	429	40	450	14	0.7	424	12
LYH22-70	0.521	0.029	0.0687	0.0012	0.0217	0.001	0.0562	0.0033	425	19	428.2	7.2	433	20	420	10	0.7	428.2	7.2
LYH22-105	0.565	0.077	0.0706	0.0031	0.0239	0.0031	0.059	0.0084	444	52	439	18	476	62	420	26	1.1	439	18
LYH22-21	0.55	0.054	0.0711	0.0016	0.0222	0.0021	0.0555	0.0054	443	36	442.6	9.3	443	42	410	19	0.1	442.6	9.3
LYH22-35	0.58	0.042	0.0721	0.0015	0.0221	0.0014	0.0594	0.0044	452	26	448.3	9.1	441	27	440	14	0.8	448.3	9.1
LYH22-29	0.561	0.032	0.07251	0.00084	0.02349	0.00085	0.0562	0.003	447	21	451.2	5	470	17	400	11	0.9	451.2	5
LYH22-103	0.564	0.038	0.0727	0.0019	0.0215	0.0013	0.0562	0.0041	451	25	452	12	430	26	410	14	0.2	452	12
LYH22-58	0.575	0.029	0.075	0.001	0.02372	0.0009	0.0564	0.0029	463	19	465.8	6	474	18	430	10	0.6	465.8	6
LYH22-51	0.608	0.098	0.075	0.0032	0.0231	0.0033	0.061	0.01	468	67	466	19	460	65	450	32	0.4	466	19
LYH22-84	0.586	0.047	0.0751	0.0022	0.0239	0.0014	0.0564	0.004	467	31	467	13	477	29	440	14	0	467	13
LYH22-96	0.595	0.025	0.0754	0.0011	0.02462	0.00092	0.0573	0.0026	470	16	468.5	6.8	491	18	468	94	0.3	468.5	6.8
LYH22-92	0.59	0.024	0.0758	0.0011	0.0261	0.001	0.0559	0.0023	471	16	470.6	6.4	520	20	412	87	0.1	470.6	6.4
LYH22-5	0.609	0.026	0.07705	0.00083	0.02352	0.00069	0.057	0.0022	481	16	478.4	5	470	14	445	81	0.5	478.4	5
LYH22-46	0.624	0.021	0.0791	0.00092	0.0242	0.0006	0.0579	0.0019	491	13	490.6	5.5	483	12	520	72	0.1	490.6	5.5
LYH22-69	0.645	0.028	0.0817	0.0018	0.0268	0.0013	0.058	0.0026	506	17	506	11	535	25	511	97	0	506	11
LYH22-40	0.678	0.078	0.0875	0.0054	0.0265	0.0039	0.0548	0.0096	538	55	540	32	527	76	510	33	0.4	540	32
LYH22-121	0.724	0.046	0.0896	0.0022	0.0321	0.0017	0.0584	0.0037	552	27	554	13	638	34	510	13	0.4	554	13
LYH22-2	0.832	0.034	0.0991	0.002	0.0343	0.0018	0.0604	0.0024	612	19	612	12	682	35	619	84	0	612	12
LYH22-16	1.008	0.078	0.113	0.0012	0.036	0.0021	0.0628	0.0045	690	39	691.1	6.7	713	41	590	15	0.2	691.1	6.7
LYH22-41	1.007	0.083	0.1159	0.0025	0.0505	0.0058	0.0636	0.0051	703	42	706	15	990	10	680	17	0.4	706	15
LYH22-77	1.128	0.077	0.125	0.0032	0.041	0.0022	0.0648	0.0042	758	36	759	18	811	42	740	14	0.1	759	18
LYH22-39	1.32	0.12	0.1404	0.0032	0.0406	0.0022	0.0685	0.0059	844	54	847	18	804	42	810	19	0.4	847	18
LYH22-9	1.409	0.075	0.1479	0.0021	0.0478	0.002	0.0688	0.0036	890	32	889	12	942	38	840	11	0.1	889	12
LYH22-88	1.441	0.048	0.1504	0.0022	0.0525	0.0041	0.0698	0.0024	904	21	903	12	1029	79	914	67	0.1	903	12
LYH22-42	1.452	0.094	0.1514	0.0027	0.0464	0.0026	0.0708	0.0046	911	40	908	15	916	51	890	13	0.3	908	15
LYH22-50	1.463	0.089	0.1521	0.0032	0.0581	0.0047	0.0717	0.0045	919	37	912	18	1137	90	960	13	0.8	912	18
LYH22-104	1.492	0.034	0.1544	0.0017	0.0531	0.0025	0.0701	0.0014	924	14	926.2	9.7	1043	48	916	41	0.2	926.2	9.7
LYH22-28	1.58	0.21	0.1609	0.004	0.0474	0.0046	0.0736	0.0092	961	83	962	22	934	89	920	25	0.1	962	22
LYH22-82	1.62	0.077	0.1617	0.0026	0.0502	0.002	0.0719	0.0035	968	30	966	14	989	38	930	11	0.2	966	14
LYH22-89	1.591	0.054	0.1621	0.0024	0.0509	0.0023	0.0701	0.0025	966	21	968	13	1003	44	916	76	0.2	968	13
LYH22-8	1.68	0.12	0.1661	0.0027	0.051	0.003	0.0736	0.005	987	46	990	15	1004	58	980	14	0.3	990	15
LYH22-48	1.893	0.051	0.1831	0.0019	0.0567	0.0013	0.0751	0.0023	1081	18	1084	11	1114	26	1077	6	0.3	1084	11
LYH22-25	1.93	0.26	0.1856	0.0043	0.0535	0.0053	0.077	0.01	1098	95	1097	23	1050	10	1000	26	0.1	1097	23
LYH22-73	2.137	0.099	0.1957	0.0028	0.0668	0.0032	0.0798	0.0034	1148	30	1152	15	1304	60	1135	8	0.3	1152	15
LYH22-74	2.145	0.058	0.1983	0.0023	0.0626	0.0018	0.0785	0.0019	1165	19	1166	12	1226	35	1166	47	0.1	1166	12
LYH22-34	2.45	0.3	0.2031	0.0077	0.061	0.0068	0.085	0.01	1191	88	1189	41	1190	13	1110	25	0.2	1189	41
LYH22-10	2.36	0.12	0.2081	0.0027	0.0634	0.0019	0.0822	0.0038	1223	36	1220	14	1241	36	1186	9	0.2	1220	14
LYH22-44	3.1	0.12	0.2482	0.004	0.0758	0.0029	0.0908	0.0033	1427	29	1428	21	1475	54	1439	65	0.1	1428	21
LYH22-67	3.08	0.11	0.2498	0.0043	0.0793	0.0043	0.0907	0.0038	1436	29	1437	22	1539	8	1458	8	0.1	1437	22
LYH22-53	3.16	0.21	0.2502	0.0073	0.0752	0.0092	0.0925	0.0055	1442	51	1439	38	1460	17	1460	12	0.2	1439	38
LYH22-99	3.37	0.11	0.2601	0.0058	0.0915	0.0088	0.0938	0.0026	1493	25	1490	30	1780	16	1491	54	0.2	1490	30
LYH22-75	3.5	0.19	0.266	0.0067	0.0792	0.0056	0.0941	0.005	1520	42	1519	34	1540	10	1480	10	0.1	1519	34
LYH22-12	3.65	0.37	0.2719	0.0066	0.0809	0.0053	0.094	0.0089	1550	84	1549	33	1584	9	1460	19	0.1	1549	33
LYH22-68	4.08	0.23	0.2924	0.0072	0.099	0.0079	0.1042	0.006	1653	44	1653	36	1900	15	1690	10	0	1653	36
LYH22-30	4.32	0.22	0.2996	0.0069	0.0976	0.0074	0.1048	0.0056	1689	45	1689	34	1880	14	1680	10	0	1689	34
LYH22-18	4.6	0.81	0.308	0.011	0.112	0.015	0.109	0.019	1730	150	1731	53	2130	28	1810	36	0.1	1731	53
LYH22-65	4.59	0.42	0.311	0.01	0.0994	0.0086	0.11	0.01	1754	72	1750	51	1930	15	1830	16	0.2	1750	51
LYH22-3	4.69	0.52	0.313	0.011	0.093	0.01	0.104	0.011	1752	93	1756	53	1800	19	1730	21	0.2	1756	53
LYH22-79	4.75	0.31	0.3195	0.0079	0.0969	0.0069	0.1118	0.0071	1783	55	1785	39	1870	13	1820	12	0.1	1785	39
LYH22-37	4.86	0.31	0.3215	0.0079	0.0889	0.0048	0.1107	0.007	1798	55	1799	39	1718	8	1820	10	0.1	1799	39
LYH22-36	4.89	0.3	0.3247	0.0082	0.0997	0.0068	0.1082	0.0061	1809	52	1811	40	1920	12	1760	10	0.1	1811	40
LYH22-111	5.17	0.49	0.329	0.02	0.101	0.011	0.116	0.012	1831	79	1832	98	1940	20	1820	20	0.1	1832	98
LYH22-26	5.43	0.3	0.333	0.003	0.0937	0.0039	0.1158	0.006	1849	47	1852	14	1810	72	1802	93	0.2	1852	14
LYH22-27	5.47	0.68	0.3332	0.0076	0.0892	0.0071	0.118	0.013	1850	110	1853	36	1720	13	1810	20	0.2	1853	36
LYH22-60	5.21	0.18	0.3342	0.006	0.0557	0.0034	0.1172	0.0034	1860	30	1861	28	1094	66	1898	53	0.1	1861	28
LYH22-106	5.3	0.23	0.336	0.015	0.105	0.011	0.1161	0.0063	1864	37	1862	72	2010	20	1917	96	0.1	1862	72
LYH22-76	5.31	0.22	0.3368	0.0082	0.0898	0.0049	0.1165	0.0048	1871	36	1869	40	1735	9	1878	78	0.1	1869	40
LYH22-7	5.34	0.41	0.3374	0.0079	0.0998	0.0067	0.1171	0.009	1875	68	1872	38	1930	12	1840	14	0.2	1872	38
LYH22-57	5.33	0.34	0.3392	0.007	0.0971	0.0069	0.1154	0.0084	1878	56	1883	33	1870	13	1850	13	0.3	1883	33
LYH22-59	5.43	0.22	0.3403	0.0045	0.098	0.0071	0.1156	0.0053	1885	35	1888	22	1890	13	1870	84	0.2	1888	22
LYH22-4	5.66	0.53	0.3438	0.0081	0.094	0.01	0.119	0.011	1908	83	1904	39	1800	19	1890	17	0.2	1904	39
LYH22-95	5.61	0.21	0.347	0.0087	0.1095	0.0067	0.1171	0.004	1917	32	1919	41	2100	12	1909	60	0.1	1919	41
LYH22-56	5.71	0.12	0.3495	0.0043	0.1185	0.004	0.1204	0.0027	1930	19	1931	21	2260	71	1956	41	0.1	1931	21
LYH22-94	5.73	0.45	0.352	0.011	0.096	0.015	0.112	0.011	1931	68	1944	52	1840	28	1880	15	0.7	1944	52
LYH22-31	6.48	0.24	0.3732	0.0055	0.1056	0.0059	0.1272	0.0042	2046	35	2044	26	2030	11	2064	62	0.1	2044	26
LYH22-115	7.63	0.37	0.406	0.01	0.1204	0.007	0.1371	0.0057	2196	49	2196	48	2300	13	2199	65	0	2196	48
LYH22-114	7.83	0.44	0.408	0.013	0.1241	0.0094	0.1361	0.007	2215	50	2215	59	2360	17	2185	90	0	2215	59
LYH22-101	7.91	0.16	0.4105	0.0063	0.1249	0.0036	0.1378	0.0026	2215	19	2219	29	2376	64	2199	33	0.2	2219	29
LYH22-81	9.81	0.2	0.4536	0.0062	0.132	0.0036	0.1567	0.0027	2417	19	2416	27	2503	65	2414	30	0	2416	27
LYH22-19	10.42	0.69	0.4594	0.0063	0.1372	0.0052	0.1632	0.0099	2434	61	2436	28	2594	93	2400	10	0.1	2436	28
LYH22-45	10.44	0.35	0.4654	0.0093	0.152	0.018	0.1676	0.0053	2468	31	2469	42	2830	31	2531	50	0	2469	42
LYH22-71	10.5	0.32	0.4672	0.0076	0.1493	0.0056	0.167	0.0045	2475	28	2475	34	2809	99	2526	47	0	2475	34
LYH22-55	10.59	0.39	0.47	0.011	0.1343	0.0089	0.1643	0.0045	2482	34	2483	46	2570	15	2494	45	0	2483	46
LYH22-119	10.55	0.27	0.4706	0.0091	0.142	0.0052	0.1625	0.0042	2481	24	2484	39	2675	92	2490	43	0.1	2484	39
LYH22-47	10.92	0.31	0.4762	0.0062	0.1492	0.0085	0.1674	0.0056	2512	26	2510	27	2800	15	2519	56	0.1	2510	27
LYH22-98	11.21	0.56	0.482	0.014	0.129	0.012	0.1658	0.0078	2530	46	2534	62	2450	21	2518	78	0.2	2534	62
LYH22-1	11.5	1.4	0.4838	0.0078	0.133	0.012	0.176	0.02	2550	11	2544	34	2520	21	2580	19	0.2	2544	34
LYH22-62	11.41	0.71	0.486	0.013	0.1504	0.0098	0.173	0.011	2556	61	2552	54	2830	17	2570	11	0.2	2552	54
LYH22-93	11.65	0.93	0.482	0.025	0.151	0.019	0.17	0.01	2569	72	2570	12	2830	32	2590	12	0	2570	12
LYH22-38	12.37	0.25	0.5047	0.0052	0.1508	0.0031	0.1794	0.0029	2630	19	2632	22	2841	54	2644	2.6	0.1	2632	22
LYH22-85	13.08	0.7	0.517	0.023	0.149	0.024	0.1828	0.0087	2684	49	2690	10	2790	42	2676	8	0.2	2690	10
LYH22-117	17.5	1.3	0.581	0.033	0.203	0.021	0.225	0.012	2965	70	2970	13	3720	34	2997	8.5	0.2	2970	13

## Sheet: Sample2
Analysis	Ratios								Ages								Discordance (%)	Best Age (Ma)
	207Pb/235U		206Pb/238U		208Pb/232Th		207Pb/206Pb		207Pb/235U		206Pb/238U		208Pb/232Th		207Pb/206Pb
		2 s.e.		2 s.e.		2 s.e.		2 s.e.		2 s.e.		2 s.e.		2 s.e.		2 s.e.			2 s.e.
LYH85-70	0.163	0.066	0.0243	0.0016	0.0101	0.0026	0.05	0.02	151	59	155	10	202	52	140	7	2.6	155	10
LYH85-54	0.179	0.038	0.0266	0.0012	0.0086	0.00076	0.052	0.012	165	33	169.1	7.6	173	15	200	41	2.4	169.1	7.6
LYH85-100	0.191	0.024	0.02685	0.00086	0.0071	0.0012	0.0514	0.0068	174	20	170.7	5.4	143	25	140	23	1.9	170.7	5.4
LYH85-40	0.254	0.021	0.03554	0.00072	0.01191	0.00086	0.0536	0.0043	227	17	225.1	4.5	239	17	280	15	0.8	225.1	4.5
LYH85-41	0.26	0.024	0.0373	0.0012	0.012	0.001	0.0488	0.0039	233	19	235.8	7.4	241	20	130	16	1.2	235.8	7.4
LYH85-20	0.267	0.02	0.03783	0.00078	0.01309	0.00077	0.0527	0.0042	235	16	239.3	4.8	263	15	220	15	1.8	239.3	4.8
LYH85-56	0.289	0.029	0.03999	0.00092	0.0138	0.00098	0.0517	0.0052	257	22	252.7	5.7	277	20	220	18	1.7	252.7	5.7
LYH85-23	0.293	0.053	0.0404	0.0013	0.0144	0.0016	0.0497	0.0089	256	40	255.4	8	289	32	270	35	0.2	255.4	8
LYH85-115	0.28	0.09	0.0409	0.0043	0.0105	0.0032	0.045	0.015	256	76	258	26	210	64	180	59	0.8	258	26
LYH85-74	0.304	0.022	0.04161	0.00091	0.0157	0.0012	0.0559	0.0043	266	17	262.7	5.6	315	25	330	14	1.3	262.7	5.6
LYH85-29	0.309	0.043	0.0419	0.0017	0.0124	0.0014	0.0523	0.0072	266	34	266	10	248	28	360	27	0	266	10
LYH85-7	0.304	0.021	0.0434	0.00071	0.01445	0.00099	0.052	0.0036	271	16	273.9	4.4	290	20	290	13	1.1	273.9	4.4
LYH85-53	0.321	0.024	0.04417	0.00099	0.01467	0.00081	0.0534	0.0041	280	19	278.5	6.1	294	16	290	15	0.5	278.5	6.1
LYH85-9	0.34	0.16	0.0447	0.0034	0.0122	0.0052	0.052	0.024	280	12	282	21	240	10	90	80	0.7	282	21
LYH85-46	0.34	0.057	0.0453	0.0021	0.0129	0.0018	0.0538	0.0092	286	43	285	13	258	36	170	28	0.4	285	13
LYH85-49	0.328	0.092	0.0456	0.0028	0.013	0.0016	0.052	0.014	288	72	287	17	260	32	210	47	0.3	287	17
LYH85-21	0.328	0.021	0.04583	0.00092	0.01546	0.00085	0.0536	0.0035	285	16	288.8	5.7	311	17	300	13	1.3	288.8	5.7
LYH85-14	0.336	0.019	0.04648	0.00071	0.01451	0.00062	0.0535	0.0032	292	15	292.8	4.4	291	12	340	12	0.3	292.8	4.4
LYH85-99	0.357	0.036	0.0471	0.0014	0.0157	0.0015	0.0534	0.0053	299	27	296.3	8.6	313	29	320	18	0.9	296.3	8.6
LYH85-105	0.389	0.023	0.053	0.0011	0.01697	0.00099	0.0542	0.0032	336	17	333.1	7	340	20	360	12	0.9	333.1	7
LYH85-113	0.398	0.045	0.0549	0.0035	0.0181	0.0026	0.0527	0.0059	348	28	344	22	362	52	280	23	1.2	344	22
LYH85-35	0.494	0.036	0.0656	0.0013	0.0212	0.0018	0.057	0.0039	407	23	409.3	8.1	425	35	400	14	0.6	409.3	8.1
LYH85-121	0.515	0.077	0.067	0.0038	0.0265	0.0038	0.0555	0.0063	420	52	418	23	529	74	410	25	0.5	418	23
LYH85-55	0.524	0.078	0.069	0.0037	0.024	0.019	0.0554	0.0087	426	52	430	23	480	38	390	33	0.9	430	23
LYH85-38	0.551	0.039	0.0704	0.0013	0.0237	0.0011	0.0564	0.004	440	25	438.5	7.6	473	21	420	14	0.3	438.5	7.6
LYH85-93	0.552	0.036	0.0706	0.0014	0.0237	0.0016	0.0577	0.0039	443	23	439.6	8.2	474	32	520	15	0.8	439.6	8.2
LYH85-71	0.545	0.027	0.0717	0.0014	0.0267	0.0019	0.055	0.0028	443	18	446.4	8.5	532	36	430	11	0.8	446.4	8.5
LYH85-81	0.564	0.064	0.072	0.0029	0.0257	0.0024	0.0584	0.0069	447	43	448	18	513	48	500	25	0.2	448	18
LYH85-43	0.569	0.063	0.0721	0.0023	0.0249	0.0038	0.0584	0.0063	449	40	449	14	495	75	440	22	0	449	14
LYH85-76	0.555	0.04	0.0723	0.0018	0.0221	0.0022	0.0535	0.0039	447	26	450	11	442	44	430	15	0.7	450	11
LYH85-109	0.584	0.041	0.0736	0.0015	0.0232	0.0016	0.0569	0.004	457	26	457.7	9.2	463	31	410	14	0.2	457.7	9.2
LYH85-114	0.58	0.037	0.0746	0.0014	0.0231	0.0012	0.0568	0.0036	462	23	463.6	8.5	461	24	460	12	0.3	463.6	8.5
LYH85-73	0.597	0.04	0.0749	0.0016	0.0239	0.0013	0.0603	0.0043	469	25	465.3	9.3	477	25	570	14	0.8	465.3	9.3
LYH85-59	0.584	0.07	0.075	0.0031	0.0271	0.0031	0.0566	0.0062	465	47	466	18	540	62	390	22	0.2	466	18
LYH85-68	0.598	0.057	0.0753	0.0023	0.0237	0.0019	0.0596	0.0056	472	37	468	14	473	38	530	21	0.9	468	14
LYH85-80	0.605	0.09	0.0755	0.0048	0.0253	0.0042	0.0602	0.0084	469	59	469	29	504	83	630	28	0	469	29
LYH85-32	0.587	0.042	0.0756	0.0014	0.0235	0.0012	0.0572	0.004	467	27	469.3	8.4	470	24	480	14	0.5	469.3	8.4
LYH85-36	0.605	0.037	0.0759	0.0013	0.0268	0.0013	0.0583	0.0036	475	24	471.6	7.6	534	26	490	12	0.7	471.6	7.6
LYH85-4	0.581	0.039	0.0772	0.002	0.0239	0.0023	0.0541	0.0037	475	24	479	12	478	46	360	15	0.8	479	12
LYH85-67	0.607	0.026	0.0773	0.001	0.0256	0.0011	0.0577	0.0025	477	17	480	6.2	510	22	486	89	0.6	480	6.2
LYH85-51	0.58	0.052	0.0777	0.0019	0.0246	0.0016	0.0577	0.0053	480	35	482	11	489	32	390	17	0.4	482	11
LYH85-11	0.62	0.043	0.0782	0.0016	0.0242	0.0018	0.0585	0.0044	489	28	485.6	9.6	483	35	540	16	0.7	485.6	9.6
LYH85-101	0.618	0.06	0.0785	0.0021	0.0256	0.0018	0.056	0.0055	486	38	487	12	510	36	420	20	0.2	487	12
LYH85-104	0.627	0.035	0.0792	0.002	0.0244	0.0013	0.0573	0.0033	490	22	491	12	488	26	450	12	0.2	491	12
LYH85-119	0.646	0.086	0.0801	0.0037	0.0189	0.0033	0.0602	0.0084	500	52	497	22	378	66	520	28	0.6	497	22
LYH85-48	0.638	0.066	0.08	0.0023	0.0256	0.0022	0.0559	0.006	500	42	498	13	509	43	370	20	0.4	498	13
LYH85-79	0.66	0.13	0.0812	0.0052	0.0217	0.0066	0.062	0.014	502	79	503	31	430	13	510	45	0.2	503	31
LYH85-16	0.659	0.038	0.0817	0.0016	0.0255	0.0011	0.0608	0.0036	509	23	506.2	9.3	510	22	540	12	0.6	506.2	9.3
LYH85-86	0.645	0.06	0.0823	0.0032	0.0284	0.0036	0.0601	0.0062	511	39	510	19	565	70	530	22	0.2	510	19
LYH85-45	0.63	0.1	0.0829	0.0035	0.0239	0.0032	0.0539	0.0087	514	56	513	21	476	63	330	31	0.2	513	21
LYH85-33	0.667	0.028	0.083	0.0011	0.02701	0.00084	0.0594	0.0023	518	17	514.6	6.4	539	16	547	82	0.7	514.6	6.4
LYH85-60	0.668	0.039	0.0834	0.0016	0.0231	0.002	0.0593	0.0037	514	24	515.9	9.6	460	39	510	12	0.4	515.9	9.6
LYH85-17	0.673	0.063	0.0852	0.0032	0.0249	0.0026	0.0561	0.0052	523	39	527	19	496	52	460	19	0.8	527	19
LYH85-103	0.711	0.024	0.0876	0.0013	0.0278	0.0013	0.0587	0.0022	544	14	542.2	7.8	554	25	556	80	0.3	542.2	7.8
LYH85-52	0.705	0.026	0.0886	0.0011	0.0283	0.0013	0.0583	0.0021	544	16	547.1	6.7	564	26	515	79	0.6	547.1	6.7
LYH85-66	0.739	0.075	0.0909	0.0072	0.0292	0.0052	0.0589	0.0094	559	43	560	42	580	10	490	34	0.2	560	42
LYH85-82	0.763	0.058	0.0916	0.0034	0.028	0.0023	0.0627	0.0038	570	33	567	20	563	44	690	13	0.5	567	20
LYH85-94	0.95	0.18	0.1103	0.0097	0.039	0.019	0.063	0.011	672	93	674	56	760	37	640	37	0.3	674	56
LYH85-13	1.088	0.079	0.1221	0.0039	0.0387	0.0022	0.0676	0.0042	740	38	742	23	766	43	840	13	0.3	742	23
LYH85-8	1.27	0.34	0.137	0.011	0.0486	0.0047	0.067	0.015	830	15	828	62	958	91	870	44	0.2	828	62
LYH85-106	1.382	0.073	0.1456	0.0032	0.051	0.0041	0.0689	0.0032	879	31	876	18	1004	79	900	10	0.3	876	18
LYH85-91	1.46	0.16	0.1518	0.0063	0.034	0.018	0.068	0.0054	909	65	911	35	670	35	900	21	0.2	911	35
LYH85-61	1.538	0.093	0.156	0.0033	0.051	0.0026	0.0716	0.0043	930	36	933	19	1003	49	870	12	0.3	933	19
LYH85-27	1.59	0.36	0.1574	0.0057	0.0372	0.0067	0.073	0.017	940	14	942	32	740	13	850	49	0.2	942	32
LYH85-25	1.6	0.1	0.1605	0.003	0.0505	0.0024	0.0735	0.0047	963	40	959	17	994	45	930	13	0.4	959	17
LYH85-15	1.682	0.072	0.1686	0.0027	0.0653	0.0032	0.0732	0.0029	1004	27	1004	15	1276	61	1013	81	0	1004	15
LYH85-18	1.74	0.15	0.1714	0.0054	0.0505	0.004	0.0735	0.0063	1022	52	1025	28	1009	74	1050	17	0.3	1025	28
LYH85-110	1.816	0.082	0.1773	0.0041	0.0536	0.0025	0.075	0.0031	1052	30	1054	22	1054	48	1074	85	0.2	1054	22
LYH85-30	1.847	0.065	0.1786	0.0019	0.059	0.0021	0.0754	0.0025	1057	23	1059	10	1161	39	1059	68	0.2	1059	10
LYH85-108	1.89	0.13	0.1816	0.0045	0.0557	0.0063	0.0711	0.0049	1074	43	1075	25	1090	12	980	15	0.1	1075	25
LYH85-111	1.92	0.13	0.182	0.0045	0.0545	0.0039	0.0772	0.0053	1076	45	1077	25	1068	74	1090	14	0.1	1077	25
LYH85-34	1.93	0.21	0.1825	0.0062	0.0534	0.0041	0.078	0.0081	1077	76	1079	33	1051	78	1090	20	0.2	1079	33
LYH85-26	1.88	0.11	0.1826	0.0028	0.0599	0.0028	0.0759	0.0042	1077	40	1081	15	1191	56	1050	12	0.4	1081	15
LYH85-84	2.25	0.15	0.2036	0.0036	0.0635	0.0023	0.0803	0.0055	1195	49	1194	20	1245	44	1200	13	0.1	1194	20
LYH85-112	2.33	0.13	0.2071	0.0044	0.0649	0.0058	0.0797	0.0046	1213	39	1217	24	1270	11	1160	11	0.3	1217	24
LYH85-24	2.85	0.51	0.2376	0.0097	0.081	0.014	0.086	0.012	1370	14	1374	51	1580	26	1390	28	0.3	1374	51
LYH85-65	3.21	0.34	0.2443	0.0071	0.104	0.034	0.0979	0.0084	1403	52	1407	37	1710	35	1420	11	0.3	1407	37
LYH85-90	3.37	0.16	0.2605	0.0081	0.071	0.0053	0.0948	0.0054	1493	37	1491	42	1380	10	1530	10	0.1	1491	42
LYH85-78	3.43	0.13	0.2635	0.0046	0.0698	0.0025	0.0983	0.0032	1510	28	1509	24	1363	47	1581	62	0.1	1509	24
LYH85-63	3.59	0.21	0.2686	0.0068	0.0702	0.0048	0.0973	0.0055	1536	46	1537	35	1379	92	1540	11	0.1	1537	35
LYH85-92	3.8	1.2	0.271	0.02	0.105	0.02	0.1	0.028	1550	28	1550	10	2020	38	1530	57	0	1550	10
LYH85-95	4.36	0.21	0.3015	0.007	0.1013	0.0055	0.107	0.0057	1699	40	1697	35	1950	10	1760	10	0.1	1697	35
LYH85-22	5.01	0.48	0.324	0.013	0.104	0.031	0.108	0.012	1811	81	1806	65	1970	56	1860	19	0.3	1806	65
LYH85-10	5.01	0.79	0.324	0.01	0.093	0.021	0.114	0.019	1800	13	1807	50	1780	39	1800	30	0.4	1807	50
LYH85-47	4.91	0.45	0.325	0.011	0.0886	0.0068	0.114	0.01	1812	84	1814	55	1710	13	1820	16	0.1	1814	55
LYH85-19	5.12	0.86	0.329	0.032	0.107	0.018	0.116	0.015	1830	15	1830	15	2040	34	1880	23	0	1830	15
LYH85-116	5.15	0.39	0.329	0.011	0.0999	0.0076	0.1149	0.0096	1832	63	1833	52	1920	14	1830	15	0.1	1833	52
LYH85-62	5.11	0.26	0.331	0.012	0.0944	0.0086	0.1125	0.0076	1839	46	1841	59	1820	16	1820	12	0.1	1841	59
LYH85-64	5.19	0.17	0.3324	0.0051	0.1053	0.0039	0.1176	0.0033	1846	27	1848	24	2025	73	1923	52	0.1	1848	24
LYH85-42	5.06	0.33	0.3328	0.0068	0.092	0.015	0.1103	0.0084	1848	42	1852	33	1780	27	1790	14	0.2	1852	33
LYH85-107	5.3	0.28	0.3319	0.0062	0.1041	0.0065	0.116	0.0061	1850	42	1853	30	1990	12	1822	90	0.2	1853	30
LYH85-75	5.35	0.2	0.3417	0.0057	0.1025	0.0035	0.1156	0.004	1886	31	1893	27	1969	63	1890	62	0.4	1893	27
LYH85-37	5.4	0.53	0.343	0.013	0.12	0.018	0.112	0.012	1867	88	1898	60	2270	32	1770	20	1.6	1898	60
LYH85-57	5.72	0.17	0.3502	0.0059	0.0965	0.0076	0.1185	0.0035	1930	26	1935	28	1880	14	1921	54	0.3	1935	28
LYH85-31	6.45	0.57	0.3669	0.0086	0.145	0.017	0.129	0.011	2014	78	2014	41	2710	29	2020	15	0	2014	41
LYH85-12	8.2	4.9	0.384	0.051	0.17	0.21	0.166	0.095	2090	60	2090	24	2900	3600	2000	1400	0	2090	24
LYH85-97	8.89	0.96	0.435	0.048	0.136	0.04	0.154	0.025	2320	10	2320	22	2560	69	2350	28	0	2320	22
LYH85-69	9.4	1.3	0.443	0.019	0.154	0.014	0.155	0.023	2360	13	2362	86	2900	25	2360	27	0.1	2362	86
LYH85-5	10.25	0.36	0.4656	0.006	0.1342	0.0056	0.158	0.0053	2459	32	2462	26	2544	98	2418	56	0.1	2462	26
LYH85-39	10.62	0.32	0.4705	0.0072	0.1261	0.004	0.1645	0.0048	2486	28	2483	32	2396	71	2497	49	0.1	2483	32
LYH85-118	10.61	0.29	0.4699	0.0059	0.136	0.0042	0.1657	0.0042	2488	26	2485	26	2572	74	2524	43	0.1	2485	26
LYH85-3	11	1.6	0.474	0.027	0.149	0.016	0.17	0.02	2490	12	2500	12	2790	28	2490	21	0.4	2500	12
LYH85-88	11.6	2.1	0.499	0.028	0.163	0.038	0.174	0.019	2600	14	2610	12	3020	66	2570	18	0.4	2610	12
LYH85-44	15.7	1.2	0.563	0.03	0.177	0.025	0.207	0.023	2878	57	2880	12	3290	43	2910	15	0.1	2880	12
LYH85-2	21.34	0.57	0.6297	0.0076	0.1659	0.0043	0.2443	0.0057	3145	26	3146	30	3098	75	3148	17	0	3146	30

## Sheet: Sample3
Analysis	Ratios								Ages								Discordance (%)	Best Age (Ma)
	207Pb/235U		206Pb/238U		208Pb/232Th		207Pb/206Pb		207Pb/235U		206Pb/238U		208Pb/232Th		207Pb/206Pb
		2 s.e.		2 s.e.		2 s.e.		2 s.e.		2 s.e.		2 s.e.		2 s.e.		2 s.e.			2 s.e.
LYH98-62	0.19	0.052	0.0258	0.0016	0.0077	0.001	0.053	0.014	168	43	164	10	155	21	160	45	2.4	164	10
LYH98-119	0.217	0.016	0.03124	0.00064	0.0111	0.0018	0.0506	0.0038	197	14	198.2	4	226	36	170	14	0.6	198.2	4
LYH98-107	0.235	0.037	0.0325	0.0016	0.0113	0.0012	0.059	0.01	209	30	205.8	9.9	227	25	310	30	1.6	205.8	9.9
LYH98-31	0.236	0.014	0.0333	0.00054	0.01074	0.00053	0.0512	0.003	215	11	211.2	3.3	216	11	230	11	1.8	211.2	3.3
LYH98-21	0.245	0.061	0.0342	0.0024	0.0102	0.0023	0.053	0.013	216	49	217	15	205	46	410	48	0.5	217	15
LYH98-7	0.257	0.015	0.03561	0.00056	0.01137	0.00057	0.0537	0.0031	229	12	225.5	3.5	228	11	260	10	1.6	225.5	3.5
LYH98-103	0.308	0.057	0.0357	0.002	0.013	0.0021	0.063	0.012	225	39	226	12	259	42	20	29	0.4	226	12
LYH98-82	0.255	0.031	0.036	0.0012	0.011	0.0012	0.0525	0.0066	232	25	228.2	7.5	221	25	290	23	1.7	228.2	7.5
LYH98-111	0.273	0.078	0.0362	0.0032	0.0123	0.0027	0.057	0.019	230	63	229	20	246	54	120	51	0.4	229	20
LYH98-27	0.262	0.016	0.03665	0.00073	0.01142	0.00057	0.0525	0.0034	235	13	232	4.5	229	11	280	10	1.3	232	4.5
LYH98-66	0.258	0.015	0.03674	0.00076	0.01191	0.00055	0.0511	0.0031	232	12	232.5	4.7	240	11	210	11	0.2	232.5	4.7
LYH98-45	0.258	0.046	0.038	0.0022	0.0105	0.0016	0.0489	0.009	238	33	240	14	211	32	180	29	0.8	240	14
LYH98-79	0.299	0.029	0.0401	0.0011	0.01274	0.00088	0.0555	0.0057	256	22	253.6	6.7	256	18	240	18	0.9	253.6	6.7
LYH98-41	0.31	0.1	0.043	0.0032	0.0174	0.0036	0.049	0.015	270	81	271	20	348	71	80	52	0.4	271	20
LYH98-44	0.333	0.044	0.0448	0.0017	0.0143	0.0015	0.0544	0.0071	286	33	283	10	286	29	320	26	1.1	283	10
LYH98-13	0.352	0.04	0.0477	0.0014	0.016	0.0018	0.0531	0.0068	302	30	300.4	8.6	322	35	330	24	0.5	300.4	8.6
LYH98-33	0.396	0.039	0.0545	0.0015	0.0191	0.0013	0.0529	0.0054	344	27	342	9.1	383	26	350	18	0.6	342	9.1
LYH98-52	0.484	0.072	0.0628	0.0032	0.0202	0.002	0.0561	0.0077	395	49	393	19	404	39	580	28	0.5	393	19
LYH98-12	0.527	0.055	0.0655	0.002	0.0201	0.0013	0.0594	0.0062	408	36	409	12	401	27	430	20	0.2	409	12
LYH98-6	0.515	0.09	0.0657	0.0026	0.0157	0.0027	0.059	0.011	412	61	410	15	314	53	420	38	0.5	410	15
LYH98-16	0.5	0.048	0.0662	0.0017	0.0207	0.0014	0.0552	0.0054	411	32	413	10	414	28	410	18	0.5	413	10
LYH98-63	0.527	0.034	0.0678	0.0014	0.0217	0.0011	0.057	0.0036	424	23	422.6	8.2	433	22	470	13	0.3	422.6	8.2
LYH98-2	0.52	0.021	0.06816	0.00074	0.02109	0.0008	0.0566	0.0022	427	14	425	4.5	422	16	440	79	0.5	425	4.5
LYH98-72	0.534	0.029	0.0688	0.0013	0.0227	0.0013	0.0567	0.003	432	19	429.4	8	454	26	410	10	0.6	429.4	8
LYH98-118	0.56	0.1	0.0696	0.0037	0.0258	0.0034	0.061	0.011	438	63	438	21	513	68	560	35	0	438	21
LYH98-19	0.556	0.084	0.071	0.0025	0.0214	0.0026	0.058	0.01	442	56	442	15	442	46	500	35	0	442	15
LYH98-114	0.572	0.084	0.0711	0.0029	0.0243	0.002	0.0579	0.0079	443	54	443	17	485	40	440	27	0	443	17
LYH98-29	0.565	0.07	0.0712	0.0026	0.023	0.0017	0.0571	0.0071	447	44	444	15	460	34	480	26	0.7	444	15
LYH98-18	0.555	0.059	0.072	0.0023	0.0226	0.002	0.0567	0.0059	450	38	448	14	451	39	450	20	0.4	448	14
LYH98-70	0.576	0.091	0.0722	0.0026	0.0232	0.0031	0.0595	0.0098	449	60	449	15	463	61	360	30	0	449	15
LYH98-89	0.598	0.076	0.0724	0.0023	0.0243	0.0022	0.0593	0.0076	454	47	450	14	485	43	410	23	0.9	450	14
LYH98-100	0.543	0.059	0.0727	0.0022	0.0222	0.0017	0.0572	0.0062	448	40	452	13	444	34	430	21	0.9	452	13
LYH98-112	0.589	0.098	0.0726	0.0036	0.0228	0.0026	0.059	0.01	452	62	452	22	454	51	410	32	0	452	22
LYH98-59	0.58	0.15	0.0734	0.0052	0.0246	0.0056	0.064	0.018	460	10	456	31	490	11	520	52	0.9	456	31
LYH98-87	0.61	0.15	0.0734	0.0038	0.025	0.0038	0.054	0.013	456	91	456	23	497	75	260	40	0	456	23
LYH98-26	0.569	0.072	0.0734	0.0024	0.0241	0.0019	0.0575	0.0081	453	49	457	14	481	37	480	28	0.9	457	14
LYH98-95	0.585	0.041	0.0738	0.0015	0.0235	0.0014	0.0572	0.004	460	26	458.8	8.9	468	27	430	14	0.3	458.8	8.9
LYH98-74	0.571	0.063	0.0735	0.0031	0.0241	0.0028	0.0596	0.0079	459	40	459	18	479	55	410	24	0	459	18
LYH98-39	0.578	0.048	0.0739	0.0016	0.023	0.0013	0.0553	0.0045	456	31	459.2	9.8	458	25	390	16	0.7	459.2	9.8
LYH98-11	0.567	0.023	0.0739	0.0013	0.0234	0.0013	0.0562	0.0023	456	15	459.5	8	468	25	454	91	0.8	459.5	8
LYH98-46	0.572	0.049	0.0743	0.0017	0.0233	0.0016	0.0573	0.0052	458	32	461	10	464	31	380	17	0.7	461	10
LYH98-57	0.59	0.1	0.0744	0.0036	0.0214	0.0032	0.06	0.011	461	68	462	21	428	64	470	35	0.2	462	21
LYH98-108	0.596	0.08	0.0744	0.0024	0.0243	0.0024	0.0573	0.0071	465	52	462	14	484	48	500	25	0.6	462	14
LYH98-65	0.588	0.038	0.0745	0.0015	0.0224	0.001	0.0585	0.0037	461	25	462.8	8.9	447	20	480	13	0.4	462.8	8.9
LYH98-35	0.592	0.09	0.0745	0.0029	0.0249	0.0026	0.055	0.0087	461	57	463	18	497	51	360	29	0.4	463	18
LYH98-86	0.59	0.11	0.0749	0.0043	0.0258	0.003	0.0546	0.009	466	73	465	26	527	61	300	32	0.2	465	26
LYH98-22	0.592	0.029	0.0751	0.0011	0.0233	0.0013	0.057	0.0029	468	19	466.4	6.9	464	26	470	11	0.3	466.4	6.9
LYH98-69	0.599	0.039	0.0753	0.0017	0.0232	0.001	0.0596	0.004	472	24	469	10	462	20	500	13	0.6	469	10
LYH98-71	0.577	0.047	0.0755	0.0019	0.0248	0.0027	0.0563	0.0044	466	30	469	11	493	53	430	16	0.6	469	11
LYH98-77	0.631	0.07	0.0759	0.0026	0.0244	0.0021	0.061	0.0069	470	45	471	16	485	41	460	21	0.2	471	16
LYH98-53	0.597	0.054	0.0763	0.002	0.024	0.0016	0.0584	0.0055	471	36	474	12	480	31	420	17	0.6	474	12
LYH98-34	0.608	0.042	0.0768	0.002	0.0234	0.0012	0.0565	0.0036	479	27	477	12	467	25	470	13	0.4	477	12
LYH98-23	0.605	0.045	0.0775	0.0018	0.0253	0.0018	0.0562	0.0042	480	27	481	11	505	36	410	14	0.2	481	11
LYH98-17	0.627	0.029	0.0795	0.0011	0.0257	0.0012	0.0575	0.0026	491	17	492.7	6.4	512	24	471	9	0.3	492.7	6.4
LYH98-60	0.677	0.046	0.0848	0.0018	0.0274	0.0017	0.0594	0.0042	522	28	525	11	544	33	460	14	0.6	525	11
LYH98-36	0.93	0.11	0.1044	0.0061	0.036	0.0033	0.0629	0.0051	651	56	647	37	713	63	660	17	0.6	647	37
LYH98-14	0.99	0.11	0.1128	0.0041	0.0359	0.0043	0.0657	0.0084	685	58	689	24	710	84	670	25	0.6	689	24
LYH98-101	1.144	0.097	0.1237	0.0034	0.0412	0.0026	0.0681	0.0053	754	45	753	19	820	51	760	16	0.1	753	19
LYH98-113	1.22	0.17	0.1355	0.0047	0.0457	0.0039	0.0686	0.0099	818	78	819	27	902	75	700	30	0.1	819	27
LYH98-106	1.291	0.076	0.1373	0.0023	0.0481	0.0047	0.0684	0.0037	828	34	829	13	940	9	770	11	0.1	829	13
LYH98-93	1.75	0.42	0.156	0.011	0.067	0.014	0.078	0.018	930	16	929	61	1290	25	870	47	0.1	929	61
LYH98-38	1.51	0.07	0.1562	0.0021	0.0505	0.003	0.0699	0.0033	936	29	935	12	999	56	891	96	0.1	935	12
LYH98-83	1.545	0.08	0.1567	0.0025	0.0486	0.0021	0.0712	0.0037	941	31	938	14	957	41	890	11	0.3	938	14
LYH98-48	1.58	0.19	0.1593	0.0063	0.0537	0.006	0.0708	0.0089	946	74	953	35	1050	12	840	26	0.7	953	35
LYH98-97	1.65	0.13	0.1611	0.0034	0.05	0.0029	0.0731	0.0054	965	50	964	18	984	56	930	15	0.1	964	18
LYH98-40	1.68	0.17	0.1684	0.0057	0.0508	0.007	0.073	0.0073	1003	60	1003	31	1000	13	980	19	0	1003	31
LYH98-50	1.83	0.14	0.1697	0.0035	0.0526	0.0043	0.076	0.0052	1018	43	1013	19	1029	81	1010	12	0.5	1013	19
LYH98-115	1.75	0.11	0.1714	0.0024	0.0553	0.0027	0.0734	0.0042	1018	41	1020	13	1090	51	960	12	0.2	1020	13
LYH98-116	1.95	0.16	0.1812	0.005	0.0652	0.0043	0.0763	0.0051	1075	56	1074	28	1270	82	1010	14	0.1	1074	28
LYH98-121	1.99	0.32	0.185	0.01	0.0614	0.0068	0.08	0.014	1090	12	1091	56	1200	13	1030	37	0.1	1091	56
LYH98-4	2.13	0.61	0.191	0.016	0.0718	0.006	0.084	0.024	1130	23	1129	86	1400	11	1140	73	0.1	1129	86
LYH98-43	2.18	0.46	0.198	0.015	0.073	0.026	0.078	0.014	1160	15	1162	83	1410	50	1080	46	0.2	1162	83
LYH98-61	2.16	0.15	0.1975	0.005	0.0608	0.0049	0.0808	0.006	1169	50	1165	26	1189	94	1180	15	0.3	1165	26
LYH98-1	3.06	0.16	0.2462	0.0052	0.0718	0.005	0.0904	0.0044	1418	39	1418	27	1400	94	1452	93	0	1418	27
LYH98-81	3.57	0.29	0.269	0.015	0.094	0.012	0.0996	0.0063	1535	68	1532	75	1810	23	1600	12	0.2	1532	75
LYH98-51	3.82	0.47	0.279	0.014	0.0848	0.0097	0.1	0.013	1580	10	1583	71	1640	18	1620	27	0.2	1583	71
LYH98-32	3.91	0.21	0.2847	0.0042	0.0848	0.0052	0.0983	0.005	1613	45	1614	21	1638	96	1571	98	0.1	1614	21
LYH98-91	4.38	0.3	0.2996	0.0079	0.0949	0.0048	0.1053	0.0067	1689	59	1693	39	1851	91	1640	12	0.2	1693	39
LYH98-37	4.42	0.33	0.3012	0.009	0.0921	0.009	0.1076	0.0086	1698	65	1699	44	1750	16	1640	16	0.1	1699	44
LYH98-96	4.1	0.71	0.3	0.018	0.096	0.015	0.106	0.021	1710	15	1709	82	1840	27	1790	31	0.1	1709	82
LYH98-67	4.55	0.3	0.3054	0.0071	0.0918	0.0065	0.1065	0.0072	1718	59	1717	35	1790	12	1700	13	0.1	1717	35
LYH98-78	4.67	0.31	0.3083	0.0088	0.1009	0.0046	0.1115	0.0072	1738	55	1736	44	1940	84	1780	12	0.1	1736	44
LYH98-20	4.62	0.23	0.313	0.0062	0.0906	0.0078	0.108	0.0056	1753	43	1755	30	1730	14	1727	97	0.1	1755	30
LYH98-56	4.63	0.38	0.314	0.013	0.091	0.01	0.1088	0.009	1771	73	1770	59	1750	19	1780	16	0.1	1770	59
LYH98-68	4.57	0.73	0.311	0.032	0.079	0.026	0.106	0.018	1770	14	1780	17	1510	48	1660	29	0.6	1780	17
LYH98-9	4.74	0.3	0.3186	0.0088	0.0911	0.0071	0.1097	0.0068	1782	55	1782	43	1750	13	1830	12	0	1782	43
LYH98-8	4.66	0.67	0.319	0.013	0.113	0.014	0.11	0.016	1780	11	1783	65	2160	25	1800	25	0.2	1783	65
LYH98-24	4.98	0.4	0.3221	0.0087	0.0956	0.009	0.1103	0.0089	1796	71	1798	42	1830	17	1780	15	0.1	1798	42
LYH98-73	4.98	0.42	0.322	0.0083	0.0913	0.0067	0.1111	0.0089	1796	73	1799	40	1760	12	1780	15	0.2	1799	40
LYH98-42	4.99	0.26	0.3226	0.0073	0.0948	0.0057	0.1122	0.0062	1803	46	1802	35	1830	11	1800	11	0.1	1802	35
LYH98-54	5	0.51	0.324	0.02	0.098	0.016	0.103	0.012	1803	82	1804	99	1890	28	1800	22	0.1	1804	99
LYH98-5	4.97	0.11	0.3249	0.0032	0.0992	0.0028	0.113	0.0027	1809	19	1813	15	1908	52	1846	42	0.2	1813	15
LYH98-3	5.11	0.13	0.3285	0.0039	0.0904	0.0038	0.1141	0.0025	1834	22	1831	19	1748	71	1873	43	0.2	1831	19
LYH98-49	5.2	0.19	0.3319	0.0051	0.1083	0.0055	0.1137	0.0042	1850	32	1845	25	2070	10	1841	68	0.3	1845	25
LYH98-85	5.66	0.87	0.335	0.016	0.116	0.02	0.117	0.018	1880	14	1882	73	2200	37	1870	29	0.1	1882	73
LYH98-10	5.51	0.11	0.3415	0.0031	0.1025	0.0037	0.1188	0.0023	1899	17	1896	15	1968	68	1929	34	0.2	1896	15
LYH98-104	6	1.3	0.345	0.028	0.114	0.02	0.125	0.022	1910	17	1910	13	2170	36	2030	33	0	1910	13
LYH98-88	5.94	0.65	0.347	0.011	0.1036	0.0086	0.121	0.012	1913	95	1915	53	1980	16	1870	18	0.1	1915	53
LYH98-109	5.92	0.95	0.347	0.012	0.103	0.014	0.117	0.018	1910	15	1917	58	1970	25	1910	29	0.4	1917	58
LYH98-25	5.79	0.32	0.3512	0.006	0.1112	0.0072	0.12	0.006	1941	48	1943	28	2120	13	1954	83	0.1	1943	28
LYH98-30	6.33	0.52	0.37	0.011	0.1014	0.009	0.1211	0.0084	2028	68	2030	53	1990	15	2010	13	0.1	2030	53
LYH98-117	6.64	0.46	0.3726	0.0085	0.115	0.0055	0.1286	0.0093	2043	63	2044	41	2207	99	2030	13	0	2044	41
LYH98-64	7	1.4	0.377	0.014	0.114	0.017	0.132	0.026	2060	18	2061	67	2280	36	1990	36	0	2061	67
LYH98-102	6.8	1	0.379	0.014	0.115	0.014	0.132	0.019	2060	14	2068	65	2180	25	2060	24	0.4	2068	65
LYH98-58	6.87	0.69	0.386	0.017	0.117	0.017	0.135	0.015	2100	97	2102	79	2220	30	2160	19	0.1	2102	79
LYH98-94	9.3	1.3	0.429	0.024	0.129	0.018	0.163	0.024	2310	14	2310	10	2430	32	2360	26	0	2310	10
LYH98-75	10.21	0.45	0.458	0.0089	0.1308	0.0051	0.1612	0.0065	2432	40	2434	36	2476	9	2430	70	0.1	2434	36
LYH98-47	11	1.7	0.47	0.024	0.132	0.02	0.164	0.023	2480	15	2480	11	2490	37	2420	24	0	2480	11
LYH98-55	11	2	0.47	0.027	0.14	0.015	0.165	0.025	2480	16	2480	12	2640	26	2430	25	0	2480	12
LYH98-105	11.15	0.62	0.4771	0.0093	0.1544	0.0073	0.1708	0.0096	2516	52	2517	40	2880	13	2499	97	0	2517	40
LYH98-80	14.5	1.2	0.5359	0.0096	0.1508	0.0091	0.192	0.015	2764	79	2765	40	2830	16	2720	13	0	2765	40
LYH98-120	16.1	1.7	0.55	0.025	0.166	0.011	0.218	0.022	2860	10	2857	77	3100	20	2860	18	0.1	2857	77

## Sheet: Sample4
Analysis	Ratios								Ages								Discordance (%)	Best Age (Ma)
	207Pb/235U		206Pb/238U		208Pb/232Th		207Pb/206Pb		207Pb/235U		206Pb/238U		208Pb/232Th		207Pb/206Pb
		2 s.e.		2 s.e.		2 s.e.		2 s.e.		2 s.e.		2 s.e.		2 s.e.		2 s.e.			2 s.e.
LYH140-54	0.1537	0.0058	0.02246	0.00023	0.00676	0.0002	0.0496	0.0018	145.6	5	143.2	1.5	136.1	4	165	7	1.7	143.2	1.5
LYH140-78	0.165	0.0057	0.0237	0.0003	0.00757	0.00025	0.0508	0.0018	154.7	5	151	1.9	152.4	4.9	225	7	2.5	151	1.9
LYH140-100	0.183	0.035	0.0251	0.0012	0.0083	0.001	0.054	0.011	157	29	159.9	7.9	166	20	100	32	1.8	159.9	7.9
LYH140-57	0.21	0.012	0.02994	0.00033	0.01031	0.00044	0.0509	0.0028	193.9	9.6	190.1	2.1	207.2	8.8	230	11	2	190.1	2.1
LYH140-46	0.214	0.023	0.03102	0.00095	0.0106	0.00051	0.0503	0.0057	194	20	196.9	6	213	10	140	20	1.5	196.9	6
LYH140-44	0.222	0.013	0.03148	0.0005	0.01038	0.00041	0.0514	0.0031	202	11	199.8	3.1	208.7	8.2	230	11	1.1	199.8	3.1
LYH140-112	0.217	0.012	0.03166	0.00054	0.01108	0.00081	0.0489	0.0029	198	10	200.9	3.4	222	16	180	11	1.4	200.9	3.4
LYH140-89	0.2219	0.0063	0.03177	0.0004	0.00915	0.00025	0.0509	0.0015	204	5.4	201.6	2.5	184.1	4.9	232	63	1.2	201.6	2.5
LYH140-8	0.225	0.031	0.0319	0.0025	0.00876	0.00099	0.0517	0.0049	206	26	202	16	176	20	270	21	2	202	16
LYH140-119	0.225	0.021	0.03261	0.00065	0.0104	0.0006	0.0501	0.0045	207	17	206.8	4.1	209	12	170	17	0.1	206.8	4.1
LYH140-86	0.228	0.01	0.03268	0.00047	0.01073	0.00054	0.0512	0.0023	208.9	8.7	207.3	2.9	216	11	243	9	0.8	207.3	2.9
LYH140-36	0.2306	0.0076	0.03277	0.00031	0.01077	0.0003	0.0514	0.0017	210.4	6.2	208	1.9	216.4	5.9	240	65	1.2	208	1.9
LYH140-24	0.2344	0.0094	0.03314	0.00052	0.01133	0.00037	0.0509	0.002	213.8	7.8	210.1	3.2	228.5	7.6	234	82	1.8	210.1	3.2
LYH140-23	0.2354	0.009	0.03379	0.00047	0.01117	0.0003	0.0505	0.0019	215.5	7.5	214.2	3	224.5	6.1	202	76	0.6	214.2	3
LYH140-90	0.241	0.014	0.03379	0.00052	0.01101	0.00043	0.0521	0.0029	217	11	214.2	3.2	221.2	8.5	250	11	1.3	214.2	3.2
LYH140-4	0.24	0.0065	0.03404	0.00035	0.01128	0.00031	0.0517	0.0016	218	5.3	215.8	2.2	226.8	6.2	282	65	1	215.8	2.2
LYH140-71	0.2434	0.0097	0.03484	0.00041	0.01151	0.00033	0.0505	0.002	221.3	7.7	220.8	2.5	231.2	6.7	206	76	0.2	220.8	2.5
LYH140-5	0.2509	0.0091	0.0354	0.0004	0.01198	0.0003	0.0525	0.0019	226.9	7.3	224.2	2.5	240.6	6	287	76	1.2	224.2	2.5
LYH140-37	0.281	0.018	0.03971	0.00072	0.01348	0.00069	0.0513	0.0031	252	15	251	4.5	271	14	240	12	0.4	251	4.5
LYH140-83	0.288	0.011	0.04039	0.00052	0.01328	0.00047	0.0527	0.002	257.9	9.1	255.2	3.2	266.5	9.4	299	78	1.1	255.2	3.2
LYH140-41	0.315	0.018	0.04365	0.00063	0.01501	0.00054	0.0524	0.003	278	14	275.4	3.9	302	11	280	12	0.9	275.4	3.9
LYH140-74	0.324	0.021	0.044	0.0011	0.01466	0.00066	0.0537	0.0036	277	15	277.2	6.6	294	13	230	12	0.1	277.2	6.6
LYH140-92	0.31	0.025	0.0445	0.0011	0.01328	0.00066	0.0507	0.0041	278	19	280.5	6.8	267	13	280	15	0.9	280.5	6.8
LYH140-43	0.326	0.015	0.04564	0.0007	0.01542	0.00074	0.0513	0.0024	285	12	287.7	4.3	309	15	248	95	0.9	287.7	4.3
LYH140-80	0.333	0.032	0.0462	0.0013	0.0159	0.0011	0.0553	0.0057	292	25	291	7.9	319	22	310	19	0.3	291	7.9
LYH140-20	0.412	0.068	0.0556	0.0019	0.0153	0.0025	0.0533	0.0081	348	50	349	11	307	50	320	32	0.3	349	11
LYH140-88	0.454	0.02	0.0603	0.001	0.01771	0.00055	0.0559	0.0025	381	14	377.4	6.3	355	11	411	95	1	377.4	6.3
LYH140-6	0.461	0.024	0.0618	0.001	0.02083	0.00067	0.0558	0.0029	388	17	386.8	6.1	417	13	410	11	0.3	386.8	6.1
LYH140-28	0.468	0.018	0.0626	0.001	0.02404	0.00097	0.0557	0.002	389	12	391.4	6.1	480	19	418	76	0.6	391.4	6.1
LYH140-9	0.49	0.021	0.06401	0.00085	0.01934	0.00065	0.0569	0.0026	402	14	399.9	5.1	387	13	450	95	0.5	399.9	5.1
LYH140-106	0.49	0.017	0.06426	0.00073	0.0197	0.00051	0.0554	0.0019	404	12	401.4	4.5	395	10	414	74	0.6	401.4	4.5
LYH140-21	0.494	0.036	0.065	0.0015	0.0212	0.0021	0.0564	0.0043	406	25	406	9	422	41	400	15	0	406	9
LYH140-101	0.501	0.013	0.06559	0.00078	0.01933	0.00044	0.0556	0.0014	411.9	8.6	409.5	4.7	387.8	8.8	420	53	0.6	409.5	4.7
LYH140-2	0.511	0.037	0.0662	0.0012	0.02132	0.00094	0.0564	0.004	416	25	413.4	7.5	426	19	410	15	0.6	413.4	7.5
LYH140-110	0.503	0.013	0.06691	0.0007	0.02024	0.00047	0.0546	0.0014	414.4	8.7	417.4	4.2	405	9.4	386	54	0.7	417.4	4.2
LYH140-77	0.5	0.021	0.0669	0.0012	0.02089	0.00076	0.0545	0.0024	413	14	417.5	7.2	418	15	364	93	1.1	417.5	7.2
LYH140-111	0.508	0.012	0.06723	0.00065	0.01805	0.00073	0.0546	0.0012	417.2	7.8	419.4	3.9	361	14	396	47	0.5	419.4	3.9
LYH140-15	0.518	0.036	0.068	0.0019	0.0235	0.0013	0.0597	0.0044	427	22	424	12	469	26	570	16	0.7	424	12
LYH140-69	0.523	0.028	0.0683	0.0017	0.01774	0.0009	0.0547	0.0028	426	19	426	11	355	18	400	12	0	426	11
LYH140-118	0.522	0.02	0.06864	0.00081	0.045	0.011	0.0553	0.0023	429	13	427.9	4.9	860	210	390	89	0.3	427.9	4.9
LYH140-120	0.531	0.019	0.06884	0.00098	0.02114	0.00064	0.0559	0.0019	431	13	429.1	5.9	423	13	427	76	0.4	429.1	5.9
LYH140-66	0.536	0.023	0.0692	0.0011	0.0215	0.00079	0.0564	0.0024	435	16	431.4	6.9	430	16	446	89	0.8	431.4	6.9
LYH140-55	0.54	0.023	0.06964	0.00083	0.02237	0.00065	0.0562	0.0025	435	15	433.9	5	447	13	431	88	0.3	433.9	5
LYH140-85	0.542	0.021	0.06992	0.00089	0.02095	0.00066	0.0564	0.002	436	14	435.6	5.4	419	13	423	75	0.1	435.6	5.4
LYH140-73	0.537	0.015	0.07022	0.00068	0.02299	0.00042	0.0553	0.0015	435.6	9.7	437.4	4.1	459.4	8.4	408	57	0.4	437.4	4.1
LYH140-29	0.547	0.038	0.0703	0.0018	0.0208	0.0012	0.0557	0.004	439	25	438	11	416	23	420	15	0.2	438	11
LYH140-109	0.542	0.026	0.0704	0.0011	0.0231	0.001	0.0557	0.0026	437	17	438.2	6.8	461	20	430	10	0.3	438.2	6.8
LYH140-10	0.546	0.021	0.0704	0.0011	0.02234	0.00069	0.0574	0.0023	442	14	438.4	6.8	446	14	514	91	0.8	438.4	6.8
LYH140-61	0.547	0.017	0.07067	0.00085	0.02358	0.0006	0.0562	0.0018	442	11	440.1	5.1	471	12	428	68	0.4	440.1	5.1
LYH140-40	0.547	0.024	0.07068	0.00099	0.02373	0.00076	0.0557	0.0024	441	16	440.2	5.9	475	15	403	88	0.2	440.2	5.9
LYH140-49	0.548	0.02	0.0708	0.0011	0.02269	0.00077	0.0553	0.002	444	14	441	6.5	453	15	402	77	0.7	441	6.5
LYH140-1	0.556	0.027	0.0711	0.001	0.02268	0.00083	0.0576	0.003	444	17	442.6	6.1	453	16	480	11	0.3	442.6	6.1
LYH140-95	0.558	0.037	0.0711	0.0013	0.02102	0.00084	0.056	0.0038	445	25	442.8	7.9	420	17	420	14	0.5	442.8	7.9
LYH140-30	0.54	0.029	0.0715	0.0012	0.02455	0.00096	0.0551	0.003	444	20	445	7.2	490	19	390	11	0.2	445	7.2
LYH140-75	0.553	0.018	0.0715	0.0011	0.02506	0.00098	0.0559	0.0018	446	12	445.1	6.5	500	19	421	70	0.2	445.1	6.5
LYH140-35	0.557	0.021	0.07157	0.00082	0.0217	0.00053	0.0561	0.0019	447	14	445.6	4.9	434	11	428	75	0.3	445.6	4.9
LYH140-47	0.557	0.018	0.07184	0.0008	0.02399	0.00058	0.0558	0.0018	450	12	447.2	4.8	479	11	440	69	0.6	447.2	4.8
LYH140-18	0.558	0.016	0.07186	0.00087	0.02479	0.00066	0.0565	0.0016	451	10	447.3	5.3	495	13	475	62	0.8	447.3	5.3
LYH140-98	0.565	0.036	0.0722	0.0018	0.02242	0.00099	0.0564	0.0036	452	23	449	11	448	20	410	13	0.7	449	11
LYH140-38	0.552	0.039	0.0725	0.002	0.0229	0.0016	0.055	0.0043	451	27	451	12	457	32	380	15	0	451	12
LYH140-103	0.549	0.054	0.0728	0.0028	0.0216	0.0013	0.0559	0.0054	453	39	453	17	432	27	420	21	0	453	17
LYH140-81	0.565	0.034	0.0729	0.0016	0.0234	0.001	0.0565	0.0032	450	22	453.6	9.9	469	20	410	12	0.8	453.6	9.9
LYH140-93	0.573	0.019	0.0732	0.0011	0.02269	0.0006	0.0578	0.0019	459	12	455.1	6.5	453	12	490	73	0.9	455.1	6.5
LYH140-96	0.583	0.055	0.0735	0.0023	0.0218	0.0021	0.0568	0.0053	457	36	457	14	436	41	390	19	0	457	14
LYH140-91	0.566	0.023	0.0736	0.0011	0.02225	0.00071	0.0563	0.0024	456	15	457.9	6.8	445	14	430	86	0.4	457.9	6.8
LYH140-22	0.572	0.031	0.0737	0.0012	0.0227	0.0013	0.0561	0.0031	456	21	458.9	7.3	455	26	410	11	0.6	458.9	7.3
LYH140-17	0.576	0.016	0.07382	0.00084	0.02381	0.00077	0.0578	0.0016	462	10	459	5	475	15	495	60	0.7	459	5
LYH140-62	0.582	0.031	0.0746	0.0012	0.0244	0.0012	0.0556	0.0029	462	20	463.9	7.1	488	23	410	11	0.4	463.9	7.1
LYH140-51	0.588	0.031	0.0748	0.0013	0.02361	0.00091	0.0577	0.0028	467	19	465.1	7.9	472	18	470	10	0.4	465.1	7.9
LYH140-16	0.597	0.029	0.0763	0.0012	0.02551	0.00094	0.0585	0.0029	475	19	474	7.5	511	19	510	10	0.2	474	7.5
LYH140-94	0.602	0.022	0.07695	0.00092	0.02088	0.00063	0.0566	0.0019	476	14	477.8	5.5	417	12	459	72	0.4	477.8	5.5
LYH140-104	0.631	0.025	0.08	0.001	0.0253	0.0012	0.0574	0.0023	495	15	495.9	5.9	505	23	497	85	0.2	495.9	5.9
LYH140-50	0.638	0.038	0.0801	0.003	0.0393	0.0049	0.0577	0.0049	500	24	496	18	778	96	560	22	0.8	496	18
LYH140-114	0.79	0.04	0.0957	0.0016	0.0409	0.0019	0.0595	0.003	591	22	589	9.2	809	38	562	98	0.3	589	9.2
LYH140-117	1.094	0.041	0.1241	0.0018	0.0399	0.0011	0.0631	0.0023	752	20	754	10	791	22	696	81	0.3	754	10
LYH140-42	1.124	0.089	0.1269	0.003	0.0414	0.0044	0.0669	0.0053	774	47	770	17	819	85	800	18	0.5	770	17
LYH140-63	1.219	0.029	0.1334	0.0015	0.0452	0.0012	0.0664	0.0015	807	13	806.7	8.3	892	22	825	45	0	806.7	8.3
LYH140-68	1.326	0.098	0.141	0.0047	0.0448	0.005	0.0678	0.0055	850	43	850	27	884	97	790	17	0	850	27
LYH140-45	1.35	0.04	0.1432	0.0014	0.047	0.0023	0.0676	0.0021	866	17	863.3	7.8	927	44	847	64	0.3	863.3	7.8
LYH140-113	1.349	0.028	0.1441	0.0017	0.0468	0.0012	0.0676	0.0012	869	12	868.3	9.6	924	22	853	38	0.1	868.3	9.6
LYH140-121	1.408	0.047	0.1478	0.0019	0.0479	0.0015	0.0694	0.0023	891	20	889	11	945	29	864	73	0.2	889	11
LYH140-53	1.464	0.066	0.152	0.0023	0.0451	0.0017	0.0703	0.0031	910	27	912	13	892	33	921	86	0.2	912	13
LYH140-19	1.5	0.12	0.154	0.004	0.0558	0.0046	0.0694	0.0074	927	51	923	22	1097	89	910	20	0.4	923	22
LYH140-33	1.555	0.032	0.1589	0.0017	0.0514	0.0013	0.0708	0.0016	951	13	951	9.3	1012	26	951	45	0	951	9.3
LYH140-58	1.61	0.11	0.1628	0.0039	0.0541	0.0031	0.0725	0.0049	972	42	972	22	1065	59	1040	13	0	972	22
LYH140-65	1.656	0.059	0.1666	0.0021	0.0541	0.0015	0.072	0.0026	992	22	993	12	1070	30	970	73	0.1	993	12
LYH140-52	1.723	0.07	0.1709	0.0024	0.0506	0.0018	0.0724	0.0028	1017	27	1017	13	997	34	991	80	0	1017	13
LYH140-82	1.79	0.14	0.1741	0.0071	0.0469	0.0026	0.0745	0.0036	1036	52	1034	39	927	50	1040	98	0.2	1034	39
LYH140-97	2.23	0.049	0.2016	0.0022	0.0597	0.0022	0.08	0.0017	1187	16	1184	12	1173	42	1211	41	0.3	1184	12
LYH140-87	2.227	0.08	0.2034	0.0042	0.0544	0.0025	0.0802	0.0029	1191	26	1193	22	1070	48	1182	73	0.2	1193	22
LYH140-115	2.51	0.13	0.2175	0.0049	0.0665	0.0093	0.0841	0.0044	1271	38	1268	26	1300	18	1320	10	0.2	1268	26
LYH140-32	2.65	0.16	0.226	0.0056	0.0768	0.0097	0.0862	0.005	1312	44	1313	29	1490	18	1330	11	0.1	1313	29
LYH140-102	2.814	0.051	0.2341	0.0022	0.0688	0.0015	0.0874	0.0016	1359	14	1357	12	1343	28	1376	36	0.1	1357	12
LYH140-26	3.47	0.86	0.262	0.024	0.075	0.011	0.095	0.019	1500	21	1500	12	1470	20	1470	40	0	1500	120
LYH140-108	3.52	0.12	0.2678	0.0094	0.0792	0.0058	0.0974	0.0054	1531	27	1529	48	1540	11	1570	10	0.1	1529	48
LYH140-14	3.7	0.12	0.2759	0.0086	0.0742	0.0035	0.1019	0.0049	1569	25	1570	43	1447	65	1651	87	0.1	1570	43
LYH140-84	4.51	0.41	0.305	0.011	0.0875	0.0089	0.108	0.011	1716	76	1715	53	1690	17	1700	18	0.1	1715	53
LYH140-3	4.53	0.57	0.308	0.022	0.09	0.016	0.102	0.014	1730	110	1730	110	1750	30	1720	31	0	1730	110
LYH140-13	4.627	0.097	0.3121	0.0037	0.099	0.0025	0.1094	0.0025	1753	17	1750	18	1907	45	1784	43	0.2	1750	18
LYH140-59	4.86	0.17	0.3195	0.0056	0.1003	0.0044	0.1112	0.0042	1787	31	1786	27	1930	81	1852	63	0.1	1786	27
LYH140-7	4.94	0.2	0.3224	0.0056	0.0972	0.0027	0.1145	0.0051	1801	35	1801	27	1882	47	1842	83	0	1801	27
LYH140-60	5.12	0.12	0.329	0.0038	0.1015	0.0024	0.1134	0.0025	1836	20	1832	18	1951	44	1842	39	0.2	1832	18
LYH140-56	5.55	0.15	0.3448	0.0068	0.1048	0.0048	0.1171	0.0032	1913	24	1912	32	2010	88	1905	51	0.1	1912	32
LYH140-99	5.74	0.46	0.3495	0.0093	0.0948	0.0073	0.1165	0.0068	1931	67	1932	44	1830	13	1890	11	0.1	1932	44
LYH140-107	5.8	0.52	0.352	0.017	0.0607	0.0037	0.1193	0.0069	1942	78	1941	79	1192	69	1940	10	0.1	1941	79
LYH140-31	5.73	0.13	0.3516	0.0053	0.1069	0.0041	0.118	0.0025	1941	19	1943	25	2053	75	1925	39	0.1	1943	25
LYH140-76	7.3	0.11	0.3964	0.0043	0.118	0.0026	0.1328	0.0019	2147	14	2152	20	2253	48	2133	25	0.2	2152	20
LYH140-64	8.4	0.29	0.423	0.007	0.1474	0.0042	0.1419	0.0044	2274	31	2278	32	2774	74	2252	53	0.2	2278	32
LYH140-34	10.31	0.77	0.464	0.019	0.1134	0.0082	0.1576	0.007	2457	70	2457	81	2170	15	2426	74	0	2457	81
LYH140-12	10.8	0.14	0.476	0.004	0.1417	0.0022	0.1681	0.002	2507	12	2509	17	2676	38	2536	20	0.1	2509	17
LYH140-79	10.78	0.17	0.4785	0.005	0.1364	0.0026	0.1647	0.0022	2516	14	2519	22	2586	47	2506	22	0.1	2519	22
LYH141-106	0.201	0.015	0.02845	0.00061	0.0096	0.00043	0.0514	0.004	182	13	180.8	3.8	193	8.7	230	14	0.7	180.8	3.8
LYH141-36	0.21	0.021	0.02999	0.00078	0.0115	0.00092	0.0499	0.0049	193	18	190.4	4.9	231	18	200	18	1.4	190.4	4.9
LYH141-119	0.219	0.024	0.03	0.0012	0.0098	0.0011	0.05	0.0048	194	19	190.4	7.8	197	21	170	17	1.9	190.4	7.8
LYH141-81	0.212	0.018	0.03091	0.00087	0.01036	0.00048	0.0495	0.0043	195	15	196.2	5.5	208.3	9.5	150	16	0.6	196.2	5.5
LYH141-105	0.215	0.01	0.03091	0.00044	0.01035	0.00038	0.0506	0.0024	196.3	8.6	196.2	2.8	208.1	7.7	211	91	0.1	196.2	2.8
LYH141-9	0.2154	0.009	0.03125	0.00058	0.01035	0.00038	0.0497	0.002	198.2	7.5	198.3	3.6	208	7.6	191	77	0.1	198.3	3.6
LYH141-116	0.2259	0.0075	0.03219	0.00043	0.01112	0.0003	0.0504	0.0018	206.5	6.2	204.2	2.7	223.5	6	217	72	1.1	204.2	2.7
LYH141-31	0.2275	0.0091	0.03223	0.00043	0.01061	0.00029	0.0504	0.0021	206.9	7.5	204.4	2.7	213.3	5.7	222	82	1.2	204.4	2.7
LYH141-78	0.238	0.019	0.03304	0.00074	0.01039	0.00055	0.051	0.0039	208	15	209.5	4.6	209	11	160	13	0.7	209.5	4.6
LYH141-121	0.2333	0.0099	0.03304	0.00055	0.01063	0.00044	0.0516	0.0023	213.2	8.2	209.5	3.4	213.7	8.7	257	83	1.8	209.5	3.4
LYH141-108	0.236	0.012	0.03309	0.00059	0.0107	0.0005	0.0513	0.0026	213.8	9.7	209.8	3.7	215	10	230	10	1.9	209.8	3.7
LYH141-30	0.245	0.037	0.0332	0.0013	0.0143	0.0017	0.0529	0.0083	208	30	210.4	8.1	286	33	110	26	1.1	210.4	8.1
LYH141-29	0.238	0.015	0.0336	0.00063	0.01124	0.00047	0.0516	0.0032	216	12	213	3.9	225.9	9.4	230	12	1.4	213	3.9
LYH141-84	0.2309	0.009	0.03376	0.00047	0.01129	0.00059	0.0501	0.002	210.2	7.4	214	2.9	227	12	195	81	1.8	214	2.9
LYH141-17	0.239	0.011	0.0341	0.00055	0.01131	0.00051	0.0496	0.0022	217.7	8.5	216.1	3.4	227	10	215	87	0.7	216.1	3.4
LYH141-34	0.235	0.013	0.03426	0.00059	0.01135	0.00043	0.0491	0.0028	215	11	217.2	3.7	228.1	8.6	170	11	1	217.2	3.7
LYH141-95	0.245	0.01	0.03437	0.0004	0.01176	0.00038	0.0516	0.0022	221.7	8.4	217.9	2.5	236.3	7.6	245	85	1.7	217.9	2.5
LYH141-41	0.2445	0.0073	0.03449	0.00043	0.01147	0.00031	0.0514	0.0016	221.8	5.9	218.6	2.7	230.4	6.2	241	62	1.5	218.6	2.7
LYH141-32	0.237	0.013	0.03463	0.00061	0.01188	0.00054	0.0493	0.0027	216	11	219.4	3.8	239	11	170	10	1.5	219.4	3.8
LYH141-82	0.25	0.014	0.03485	0.00068	0.01181	0.00049	0.0527	0.003	223	11	220.7	4.2	237.3	9.8	240	10	1	220.7	4.2
LYH141-67	0.249	0.015	0.03535	0.00067	0.01171	0.00056	0.0507	0.0032	227	12	223.9	4.1	235	11	270	13	1.4	223.9	4.1
LYH141-91	0.247	0.01	0.03552	0.0006	0.01169	0.00038	0.0502	0.0021	222.6	8.4	224.9	3.7	234.9	7.7	204	83	1	224.9	3.7
LYH141-47	0.2487	0.0073	0.03566	0.00049	0.01197	0.0003	0.0506	0.0014	224.8	6	225.8	3	240.5	6	218	55	0.4	225.8	3
LYH141-114	0.2627	0.009	0.0367	0.00051	0.01366	0.00039	0.0516	0.0018	235.8	7.3	232.3	3.2	274.2	7.8	271	73	1.5	232.3	3.2
LYH141-71	0.274	0.031	0.0374	0.0012	0.01127	0.00099	0.0525	0.0057	236	24	236.5	7.5	226	20	150	19	0.2	236.5	7.5
LYH141-87	0.258	0.053	0.0378	0.0018	0.0139	0.0014	0.052	0.01	237	44	239	11	279	28	130	33	0.8	239	11
LYH141-62	0.286	0.018	0.04016	0.0007	0.01329	0.00073	0.0517	0.0032	254	14	253.8	4.3	267	15	240	13	0.1	253.8	4.3
LYH141-102	0.327	0.021	0.04447	0.0008	0.0148	0.00073	0.0546	0.0037	283	16	280.9	4.9	297	15	290	13	0.7	280.9	4.9
LYH141-59	0.378	0.038	0.0488	0.0012	0.0172	0.0011	0.055	0.0051	304	24	307.3	7.3	344	22	190	15	1.1	307.3	7.3
LYH141-45	0.359	0.013	0.04885	0.00072	0.01628	0.00042	0.0531	0.002	310.7	9.9	307.8	4.4	326.2	8.3	321	75	0.9	307.8	4.4
LYH141-79	0.39	0.03	0.0523	0.0013	0.01801	0.00099	0.0542	0.0043	330	21	328.4	7.9	360	20	340	15	0.5	328.4	7.9
LYH141-33	0.437	0.017	0.0584	0.001	0.01954	0.0007	0.055	0.002	367	12	365.8	6.3	391	14	390	79	0.3	365.8	6.3
LYH141-89	0.444	0.051	0.0603	0.0018	0.0182	0.002	0.053	0.0062	376	34	377	11	365	40	330	24	0.3	377	11
LYH141-27	0.455	0.033	0.0604	0.0026	0.0218	0.0016	0.0542	0.0043	380	23	378	16	435	31	340	16	0.5	378	16
LYH141-113	0.458	0.035	0.061	0.0014	0.0179	0.0023	0.0554	0.0042	380	24	381.9	8.5	357	45	380	16	0.5	381.9	8.5
LYH141-74	0.506	0.022	0.0658	0.0013	0.02118	0.00085	0.0563	0.0024	413	15	410.6	8.1	423	17	430	9	0.6	410.6	8.1
LYH141-23	0.506	0.032	0.0668	0.0012	0.0248	0.0018	0.0549	0.0036	419	21	417.8	7.1	495	35	390	13	0.3	417.8	7.1
LYH141-109	0.511	0.027	0.0676	0.0012	0.0226	0.001	0.055	0.003	421	18	421.6	7.4	452	20	370	11	0.1	421.6	7.4
LYH141-88	0.525	0.032	0.0678	0.0012	0.0217	0.0014	0.0559	0.0034	427	21	422.5	7.1	434	27	440	12	1.1	422.5	7.1
LYH141-115	0.523	0.019	0.0678	0.0013	0.02215	0.00086	0.0562	0.002	426	13	423.7	7.9	443	17	440	79	0.5	423.7	7.9
LYH141-83	0.524	0.031	0.0683	0.0014	0.02195	0.00091	0.056	0.0032	427	20	425.6	8.4	439	18	400	11	0.3	425.6	8.4
LYH141-92	0.517	0.018	0.06838	0.00099	0.02276	0.00061	0.0548	0.0019	427	12	426.3	5.9	455	12	367	73	0.2	426.3	5.9
LYH141-111	0.534	0.028	0.0689	0.0016	0.02434	0.00096	0.0566	0.0032	432	19	429.2	9.5	486	19	440	12	0.7	429.2	9.5
LYH141-103	0.539	0.027	0.069	0.0011	0.0225	0.00096	0.0568	0.0028	431	17	430	6.4	451	19	411	95	0.2	430	6.4
LYH141-100	0.542	0.026	0.0697	0.0013	0.02395	0.00085	0.0558	0.0027	437	17	434	8.1	478	17	410	10	0.7	434	8.1
LYH141-13	0.528	0.016	0.0697	0.00083	0.02326	0.00053	0.0559	0.0017	430	10	434.2	5	465	10	443	64	1	434.2	5
LYH141-8	0.545	0.021	0.07004	0.00085	0.02332	0.00085	0.0569	0.0023	441	14	436.9	5.2	466	17	450	86	0.9	436.9	5.2
LYH141-4	0.533	0.023	0.0703	0.0012	0.0246	0.0011	0.055	0.0025	435	16	437.6	7.1	491	22	411	95	0.6	437.6	7.1
LYH141-11	0.536	0.025	0.0706	0.001	0.02393	0.00072	0.0553	0.0027	436	17	439.5	6.2	478	14	383	97	0.8	439.5	6.2
LYH141-28	0.541	0.015	0.07072	0.00078	0.02331	0.00049	0.0557	0.0014	437	9.6	440.4	4.7	465.6	9.6	426	55	0.8	440.4	4.7
LYH141-86	0.542	0.021	0.0708	0.00091	0.02339	0.00066	0.0565	0.0022	439	14	440.9	5.5	467	13	440	83	0.4	440.9	5.5
LYH141-72	0.56	0.034	0.071	0.0022	0.0229	0.0015	0.0573	0.0033	443	21	442	13	457	30	450	12	0.2	442	13
LYH141-42	0.55	0.015	0.07118	0.0007	0.02412	0.00044	0.0557	0.0014	443.8	9.5	443.2	4.2	481.7	8.6	424	55	0.1	443.2	4.2
LYH141-69	0.551	0.022	0.0711	0.0011	0.02497	0.00095	0.0561	0.0023	444	14	443.2	6.4	500	19	445	83	0.2	443.2	6.4
LYH141-35	0.549	0.032	0.0712	0.0012	0.02376	0.00098	0.0555	0.0032	443	21	443.5	7.4	474	19	390	12	0.1	443.5	7.4
LYH141-16	0.54	0.024	0.0713	0.0018	0.0236	0.00096	0.0552	0.0022	443	15	444	11	471	19	397	89	0.2	444	11
LYH141-93	0.557	0.059	0.0715	0.0021	0.04	0.016	0.058	0.0065	444	39	445	13	780	30	490	23	0.2	445	13
LYH141-22	0.57	0.1	0.0717	0.0048	0.0269	0.003	0.057	0.01	445	63	446	29	537	60	470	30	0.2	446	29
LYH141-14	0.556	0.018	0.07174	0.00099	0.02464	0.00065	0.0565	0.0018	450	12	446.5	6	492	13	462	69	0.8	446.5	6
LYH141-96	0.558	0.021	0.0717	0.001	0.02377	0.00066	0.0571	0.0021	450	13	446.6	6.1	475	13	481	75	0.8	446.6	6.1
LYH141-112	0.56	0.018	0.07204	0.00097	0.02425	0.00085	0.0564	0.0017	451	12	448.3	5.8	484	17	448	67	0.6	448.3	5.8
LYH141-46	0.564	0.032	0.072	0.0012	0.024	0.0012	0.0568	0.0033	451	20	449	7.2	481	24	460	12	0.4	449	7.2
LYH141-1	0.559	0.026	0.0722	0.0011	0.0239	0.00078	0.0564	0.0024	448	16	449.3	6.5	477	15	458	89	0.3	449.3	6.5
LYH141-63	0.577	0.053	0.0728	0.002	0.0267	0.0022	0.058	0.0056	456	35	453	12	532	43	470	20	0.7	453	12
LYH141-6	0.579	0.028	0.0732	0.001	0.0244	0.0038	0.0575	0.0027	461	18	455.1	6.2	485	74	510	11	1.3	455.1	6.2
LYH141-97	0.583	0.07	0.0733	0.0028	0.0252	0.0027	0.0594	0.0072	459	46	456	17	503	53	540	26	0.7	456	17
LYH141-75	0.567	0.015	0.0734	0.00095	0.02511	0.00063	0.0559	0.0015	455.8	9.8	456.5	5.7	501	12	444	61	0.2	456.5	5.7
LYH141-7	0.574	0.034	0.0735	0.0015	0.0236	0.0011	0.0561	0.0035	457	23	456.9	9.1	471	22	430	13	0	456.9	9.1
LYH141-20	0.6	0.13	0.0736	0.0036	0.026	0.0032	0.058	0.011	467	81	458	21	518	63	440	39	2	458	21
LYH141-24	0.576	0.022	0.074	0.0011	0.02326	0.00079	0.056	0.0023	459	14	460	6.7	465	16	416	87	0.2	460	6.7
LYH141-51	0.584	0.026	0.0742	0.001	0.02381	0.00067	0.0574	0.0026	464	16	461.4	6.2	475	13	464	89	0.6	461.4	6.2
LYH141-61	0.585	0.03	0.0753	0.0013	0.0278	0.0016	0.0569	0.0029	468	19	468	7.6	553	31	460	11	0	468	7.6
LYH141-64	0.597	0.027	0.076	0.0014	0.025	0.0013	0.0577	0.0026	474	17	471.7	8.2	498	25	468	95	0.5	471.7	8.2
LYH141-60	0.598	0.027	0.0764	0.0018	0.02513	0.00072	0.056	0.0025	468	16	472.2	9.9	501	14	400	88	0.9	472.2	9.9
LYH141-55	0.604	0.042	0.0772	0.0018	0.0246	0.0015	0.0571	0.0041	478	27	479	11	491	29	430	14	0.2	479	11
LYH141-118	1.065	0.053	0.1203	0.0019	0.0384	0.0018	0.0636	0.0031	737	26	732	11	760	35	710	10	0.7	732	11
LYH141-117	1.162	0.09	0.1272	0.0027	0.0426	0.0028	0.0663	0.0048	776	42	772	15	843	53	750	15	0.5	772	15
LYH141-70	1.215	0.066	0.134	0.0031	0.0417	0.0045	0.0669	0.0035	804	31	811	18	824	87	850	11	0.9	811	18
LYH141-19	1.405	0.069	0.1472	0.0028	0.0496	0.0028	0.069	0.0033	882	30	884	15	976	54	880	10	0.2	884	15
LYH141-104	1.462	0.072	0.1508	0.0031	0.0478	0.0038	0.0705	0.0032	911	29	905	18	943	74	937	89	0.7	905	18
LYH141-15	1.483	0.04	0.1536	0.002	0.0512	0.0017	0.0697	0.0019	924	17	921	11	1008	33	907	56	0.3	921	11
LYH141-58	1.497	0.092	0.1541	0.0032	0.0528	0.0024	0.0703	0.0044	924	37	924	18	1039	46	930	12	0	924	18
LYH141-73	1.487	0.028	0.1543	0.0021	0.0492	0.0018	0.0698	0.0014	923	12	925	12	973	36	924	42	0.2	925	12
LYH141-110	1.519	0.046	0.1557	0.0018	0.0501	0.0019	0.0709	0.0021	938	19	933.6	9.8	986	37	971	57	0.5	933.6	9.8
LYH141-2	1.553	0.069	0.1576	0.0026	0.0527	0.0016	0.0713	0.0031	945	27	945	14	1037	30	934	89	0	945	14
LYH141-80	1.559	0.05	0.1581	0.0025	0.0602	0.002	0.0718	0.002	950	20	946	14	1184	37	968	58	0.4	946	14
LYH141-5	1.594	0.065	0.1622	0.0025	0.0548	0.0018	0.0705	0.003	969	26	969	14	1078	35	910	87	0	969	14
LYH141-38	2.11	0.058	0.1948	0.0028	0.0612	0.0019	0.0781	0.002	1151	19	1147	15	1200	35	1147	49	0.3	1147	15
LYH141-90	2.66	0.16	0.2242	0.0058	0.0754	0.005	0.0862	0.005	1305	43	1302	31	1477	96	1340	11	0.2	1302	31
LYH141-77	3	0.33	0.239	0.012	0.098	0.014	0.0954	0.009	1381	88	1391	68	1870	25	1490	19	0.7	1391	68
LYH141-25	3.007	0.062	0.2431	0.0027	0.0801	0.0019	0.0894	0.0019	1404	15	1402	14	1557	36	1403	37	0.1	1402	14
LYH141-3	3.18	0.18	0.2514	0.006	0.0847	0.0043	0.0922	0.0058	1448	46	1450	32	1642	80	1420	13	0.1	1450	32
LYH141-40	3.78	0.47	0.279	0.015	0.0858	0.0084	0.098	0.016	1582	96	1588	74	1660	16	1560	28	0.4	1588	74
LYH141-49	4.38	0.16	0.3002	0.0086	0.1004	0.0033	0.1059	0.0024	1703	30	1696	42	1937	61	1725	43	0.4	1696	42
LYH141-65	4.39	0.36	0.303	0.028	0.101	0.012	0.107	0.012	1705	66	1700	14	1950	21	1720	22	0.3	1700	140
LYH141-56	4.54	0.33	0.309	0.013	0.0915	0.0095	0.1058	0.0082	1723	58	1732	63	1760	17	1740	14	0.5	1732	63
LYH141-10	4.67	0.22	0.3115	0.0061	0.1011	0.0054	0.1106	0.0047	1747	39	1749	31	1945	98	1755	76	0.1	1749	31
LYH141-101	4.87	0.56	0.316	0.011	0.105	0.011	0.111	0.011	1780	97	1770	52	2010	20	1780	20	0.6	1770	52
LYH141-53	4.833	0.085	0.3196	0.0036	0.1026	0.0033	0.1108	0.0021	1790	15	1788	17	1975	59	1805	34	0.1	1788	17
LYH141-54	5.25	0.16	0.3346	0.0061	0.104	0.0038	0.1125	0.0032	1856	26	1859	30	1997	70	1837	51	0.2	1859	30
LYH141-44	5.474	0.093	0.3421	0.0036	0.1068	0.0028	0.1161	0.0017	1895	15	1896	17	2053	52	1896	26	0.1	1896	17
LYH141-21	5.63	0.11	0.3472	0.0047	0.1114	0.0045	0.1165	0.0027	1916	17	1920	23	2131	81	1903	41	0.2	1920	23
LYH141-76	5.75	0.14	0.3523	0.0047	0.1097	0.0034	0.1174	0.0029	1940	21	1944	23	2101	63	1910	44	0.2	1944	23
LYH141-107	5.76	0.13	0.3531	0.0044	0.1051	0.003	0.1201	0.0024	1947	20	1948	21	2016	55	1944	37	0.1	1948	21
LYH141-26	6.26	0.13	0.3668	0.005	0.1127	0.0027	0.1213	0.0023	2012	19	2014	24	2158	49	1978	35	0.1	2014	24
LYH141-50	7.45	0.15	0.3997	0.0061	0.1242	0.0032	0.1332	0.0021	2165	18	2166	28	2363	58	2135	27	0	2166	28
LYH141-48	7.82	0.11	0.4095	0.0045	0.1286	0.003	0.1388	0.0018	2210	14	2211	21	2443	54	2211	22	0	2211	21
LYH141-37	8.14	0.19	0.4159	0.0064	0.1271	0.0031	0.1428	0.0022	2241	21	2242	29	2421	56	2262	27	0	2242	29
LYH141-98	9.34	0.49	0.4392	0.0089	0.1296	0.0065	0.1541	0.0074	2356	50	2346	40	2460	12	2400	82	0.4	2346	40
LYH141-18	10.46	0.12	0.4692	0.0043	0.1401	0.0045	0.1622	0.0016	2478	11	2479	19	2659	81	2479	17	0	2479	19
LYH141-120	10.8	1.3	0.469	0.024	0.154	0.015	0.165	0.017	2490	12	2480	11	2890	26	2540	16	0.4	2480	11
LYH141-12	11.24	0.4	0.4816	0.0093	0.1522	0.0063	0.1668	0.0049	2540	34	2534	40	2860	11	2534	54	0.2	2534	40
LYH141-94	11.43	0.4	0.4841	0.0067	0.1433	0.0053	0.1729	0.0057	2550	34	2550	29	2705	92	2569	57	0	2550	29
LYH141-57	11.62	0.22	0.4918	0.0071	0.1499	0.0042	0.1708	0.0029	2574	18	2576	31	2827	75	2564	28	0.1	2576	31
LYH141-39	15.22	0.25	0.5522	0.0076	0.1618	0.0039	0.1998	0.0027	2833	15	2832	32	3034	67	2826	22	0	2832	32

## Sheet: Sample5
Analysis	Ratios								Ages								Discordance (%)	Best Age (Ma)
	207Pb/235U		206Pb/238U		208Pb/232Th		207Pb/206Pb		207Pb/235U		206Pb/238U		208Pb/232Th		207Pb/206Pb
		2 s.e.		2 s.e.		2 s.e.		2 s.e.		2 s.e.		2 s.e.		2 s.e.		2 s.e.			2 s.e.
LYH196-113	0.1523	0.0053	0.02193	0.00021	0.00652	0.00019	0.0503	0.0018	143.6	4.6	139.8	1.3	131.3	3.8	194	7	2.7	139.8	1.3
LYH196-30	0.26	0.028	0.0369	0.0011	0.0135	0.0016	0.0502	0.0059	233	23	233.5	6.6	272	32	220	24	0.2	233.5	6.6
LYH196-79	0.264	0.02	0.03774	0.0008	0.0119	0.00067	0.0494	0.0037	241	16	239.4	4.9	239	13	220	14	0.7	239.4	4.9
LYH196-6	0.29	0.13	0.0384	0.005	0.0178	0.0066	0.059	0.028	240	11	243	31	350	13	190	87	1.2	243	31
LYH196-2	0.274	0.01	0.03855	0.00053	0.01219	0.00034	0.0525	0.002	244.9	8	243.8	3.3	245.6	6.7	282	77	0.5	243.8	3.3
LYH196-32	0.272	0.024	0.0386	0.001	0.01197	0.00087	0.0522	0.005	242	19	243.9	6.4	240	17	230	18	0.8	243.9	6.4
LYH196-63	0.274	0.018	0.03874	0.00072	0.01252	0.00074	0.0516	0.0034	243	14	244.9	4.4	251	15	250	13	0.8	244.9	4.4
LYH196-22	0.274	0.014	0.03932	0.00064	0.0119	0.00083	0.0508	0.0027	246	12	248.5	4	243	16	230	10	1	248.5	4
LYH196-42	0.283	0.019	0.03951	0.00083	0.01253	0.00075	0.0499	0.0027	252	15	249.8	5.2	252	15	210	12	0.9	249.8	5.2
LYH196-86	0.299	0.029	0.0398	0.0012	0.01304	0.00077	0.0537	0.0053	253	21	250.1	6.7	262	15	220	17	1.2	250.1	6.7
LYH196-21	0.291	0.035	0.0397	0.0013	0.015	0.0015	0.0552	0.007	254	27	251.2	7.8	301	30	320	24	1.1	251.2	7.8
LYH196-68	0.273	0.024	0.03967	0.00085	0.01428	0.0008	0.053	0.0049	248	19	251.3	5.4	286	16	280	17	1.3	251.3	5.4
LYH196-111	0.286	0.012	0.0406	0.00055	0.01191	0.00071	0.0516	0.0021	254.3	9.6	256.5	3.4	239	14	243	78	0.9	256.5	3.4
LYH196-24	0.298	0.02	0.04062	0.00085	0.01188	0.00043	0.0531	0.0036	260	15	256.6	5.3	238.7	8.5	240	13	1.3	256.6	5.3
LYH196-109	0.297	0.039	0.0407	0.0013	0.01186	0.00078	0.0539	0.0076	255	30	257.3	7.9	238	16	220	25	0.9	257.3	7.9
LYH196-77	0.293	0.025	0.0409	0.0011	0.014	0.0011	0.0522	0.0047	257	20	258	7	280	21	280	17	0.4	258	7
LYH196-80	0.285	0.018	0.04097	0.00082	0.01343	0.00063	0.0506	0.0033	258	15	258.8	5.1	270	13	230	13	0.3	258.8	5.1
LYH196-57	0.293	0.008	0.04106	0.00039	0.01334	0.00042	0.0521	0.0013	260.1	6.3	259.4	2.4	267.9	8.3	270	54	0.3	259.4	2.4
LYH196-9	0.295	0.058	0.0417	0.0018	0.0132	0.0017	0.051	0.011	261	44	263	11	266	34	210	41	0.8	263	11
LYH196-10	0.302	0.037	0.0419	0.0025	0.0143	0.0017	0.0528	0.0062	264	29	264	16	286	35	250	22	0	264	16
LYH196-62	0.295	0.016	0.04212	0.00086	0.01444	0.00071	0.0514	0.003	262	13	266.4	5.3	291	14	220	11	1.7	266.4	5.3
LYH196-85	0.308	0.015	0.04269	0.00047	0.01363	0.00046	0.0529	0.0026	273	12	269.5	2.9	273.5	9.1	320	11	1.3	269.5	2.9
LYH196-5	0.287	0.087	0.0428	0.0035	0.013	0.0037	0.047	0.014	269	79	270	22	260	73	120	54	0.4	270	22
LYH196-65	0.304	0.013	0.04351	0.00063	0.01515	0.00051	0.0512	0.0023	271	10	274.5	3.9	305	10	234	85	1.3	274.5	3.9
LYH196-73	0.313	0.015	0.04405	0.00079	0.01461	0.0006	0.0522	0.0026	276	11	277.8	4.9	294	12	263	96	0.6	277.8	4.9
LYH196-69	0.367	0.021	0.05024	0.00084	0.01702	0.0009	0.0542	0.0033	312	15	315.9	5.1	341	18	300	11	1.2	315.9	5.1
LYH196-34	0.367	0.024	0.0502	0.0011	0.01603	0.00063	0.053	0.0035	314	18	316.1	6.6	321	13	270	12	0.7	316.1	6.6
LYH196-102	0.374	0.023	0.05072	0.00082	0.01419	0.00067	0.0524	0.0033	321	17	318.9	5	285	13	310	13	0.7	318.9	5
LYH196-56	0.41	0.19	0.0537	0.0053	0.0186	0.0059	0.053	0.021	340	14	337	32	370	12	240	77	0.9	337	32
LYH196-119	0.407	0.025	0.05429	0.00097	0.01786	0.00075	0.0541	0.0035	343	18	341.2	6	358	15	320	12	0.5	341.2	6
LYH196-81	0.43	0.034	0.0563	0.0018	0.018	0.0015	0.0547	0.0044	357	24	353	11	361	30	350	15	1.1	353	11
LYH196-3	0.517	0.039	0.0671	0.0017	0.0231	0.0024	0.0558	0.0045	417	26	418	10	461	47	440	16	0.2	418	10
LYH196-71	0.511	0.015	0.06743	0.00078	0.02207	0.00071	0.0552	0.0016	417	9.8	420.6	4.7	441	14	404	61	0.9	420.6	4.7
LYH196-18	0.526	0.021	0.0693	0.0014	0.0213	0.0014	0.056	0.0023	430	14	432	8.6	425	27	445	88	0.5	432	8.6
LYH196-23	0.553	0.024	0.0707	0.0011	0.02256	0.00084	0.0576	0.0024	443	16	441	6.4	451	17	476	86	0.5	441	6.4
LYH196-91	0.554	0.019	0.07111	0.00075	0.0218	0.00058	0.0563	0.002	446	13	442.8	4.5	436	12	458	76	0.7	442.8	4.5
LYH196-82	0.562	0.047	0.073	0.0025	0.0206	0.0015	0.0558	0.0049	451	31	454	15	411	30	470	21	0.7	454	15
LYH196-8	0.567	0.022	0.0741	0.001	0.02436	0.00074	0.0556	0.0022	458	14	460.9	6.3	486	15	452	87	0.6	460.9	6.3
LYH196-105	0.634	0.042	0.0798	0.0013	0.0229	0.0014	0.0587	0.0039	493	25	494.6	7.7	458	27	460	12	0.3	494.6	7.7
LYH196-106	1.283	0.046	0.139	0.0018	0.0403	0.0016	0.0676	0.0023	839	20	839	10	797	31	857	78	0	839	10
LYH196-16	2.022	0.061	0.1893	0.0028	0.0586	0.0015	0.0774	0.0021	1119	21	1117	15	1150	29	1124	54	0.2	1117	15
LYH196-47	2.88	0.13	0.2358	0.0035	0.0714	0.003	0.0875	0.0036	1367	33	1364	18	1392	57	1351	78	0.2	1364	18
LYH196-46	4.21	0.55	0.296	0.021	0.101	0.021	0.102	0.011	1660	11	1670	10	1940	38	1710	15	0.6	1670	100
LYH196-55	4.29	0.29	0.2998	0.0079	0.0946	0.007	0.1049	0.0068	1691	55	1688	39	1820	13	1700	12	0.2	1688	39
LYH196-20	4.33	0.24	0.3016	0.0076	0.0856	0.0048	0.1037	0.0059	1694	49	1698	38	1657	9	1650	11	0.2	1698	38
LYH196-89	4.47	0.39	0.303	0.011	0.0886	0.0058	0.1014	0.0075	1705	73	1703	55	1710	11	1670	14	0.1	1703	55
LYH196-83	4.5	0.14	0.3057	0.0036	0.09	0.0022	0.1071	0.0031	1723	25	1719	18	1739	42	1749	53	0.2	1719	18
LYH196-48	4.49	0.2	0.3062	0.0052	0.102	0.0049	0.1068	0.0048	1719	38	1720	26	1955	90	1735	84	0.1	1720	26
LYH196-121	4.49	0.25	0.307	0.015	0.094	0.015	0.1049	0.009	1728	47	1726	74	1820	27	1700	16	0.1	1726	74
LYH196-107	4.56	0.45	0.309	0.014	0.0815	0.0044	0.109	0.011	1739	82	1736	68	1583	81	1770	18	0.2	1736	68
LYH196-14	4.46	0.22	0.3101	0.006	0.1006	0.0051	0.1053	0.0053	1740	41	1739	30	1939	95	1736	92	0.1	1739	30
LYH196-108	4.56	0.42	0.31	0.017	0.0755	0.0035	0.1076	0.0092	1736	77	1739	83	1470	66	1740	16	0.2	1739	83
LYH196-4	4.8	0.54	0.314	0.016	0.104	0.011	0.107	0.011	1755	96	1756	77	2030	19	1730	21	0.1	1756	77
LYH196-59	4.8	0.24	0.3206	0.009	0.0974	0.0043	0.1074	0.005	1785	44	1791	44	1878	79	1754	89	0.3	1791	44
LYH196-60	4.92	0.56	0.3223	0.0083	0.1	0.016	0.114	0.011	1797	93	1801	40	1910	29	1840	18	0.2	1801	40
LYH196-53	5.17	0.45	0.332	0.013	0.095	0.011	0.115	0.01	1847	78	1844	62	1810	19	1940	16	0.2	1844	62
LYH196-75	5.19	0.1	0.3317	0.0048	0.1015	0.0041	0.1136	0.0023	1849	17	1846	23	1952	75	1852	36	0.2	1846	23
LYH196-41	5.29	0.1	0.3358	0.0058	0.0991	0.0033	0.1129	0.0021	1865	16	1865	28	1909	61	1841	33	0	1865	28
LYH196-93	5.349	0.088	0.3375	0.0029	0.0869	0.0031	0.1151	0.0017	1876	14	1874	14	1682	57	1875	26	0.1	1874	14
LYH196-104	5.315	0.084	0.3375	0.0033	0.0907	0.0029	0.1143	0.0015	1871	14	1874	16	1752	53	1866	24	0.2	1874	16
LYH196-50	5.37	0.12	0.3377	0.0033	0.1039	0.0033	0.116	0.0026	1876	19	1875	16	1995	60	1889	40	0.1	1875	16
LYH196-87	5.33	0.13	0.3378	0.0037	0.0935	0.0029	0.1151	0.0026	1872	21	1875	18	1813	53	1875	41	0.2	1875	18
LYH196-94	5.35	0.26	0.3391	0.0065	0.0888	0.005	0.1163	0.0045	1883	40	1882	31	1718	93	1893	73	0.1	1882	31
LYH196-97	5.41	0.16	0.3408	0.0059	0.0865	0.0037	0.116	0.0024	1888	24	1890	29	1675	69	1892	37	0.1	1890	29
LYH196-43	5.49	0.21	0.3427	0.0079	0.0701	0.004	0.1152	0.0041	1900	34	1898	38	1368	75	1880	67	0.1	1898	38
LYH196-51	5.54	0.25	0.343	0.013	0.1079	0.0073	0.1176	0.005	1900	39	1899	60	2070	13	1916	79	0.1	1899	60
LYH196-115	5.47	0.26	0.3432	0.0052	0.0896	0.0049	0.1131	0.0049	1901	43	1902	25	1734	9	1877	80	0.1	1902	25
LYH196-118	5.562	0.099	0.3437	0.0026	0.0961	0.0014	0.1154	0.0019	1907	15	1904	13	1856	26	1882	29	0.2	1904	13
LYH196-15	5.56	0.27	0.3462	0.0091	0.1064	0.0062	0.1169	0.0042	1915	40	1915	43	2040	11	1895	65	0	1915	43
LYH196-17	5.59	0.23	0.3445	0.0062	0.0984	0.0042	0.1196	0.0053	1915	36	1917	32	1896	76	1949	80	0.1	1917	32
LYH196-29	5.73	0.24	0.3484	0.0093	0.1014	0.0071	0.1202	0.0049	1927	37	1925	45	1970	14	1960	70	0.1	1925	45
LYH196-36	5.84	0.18	0.3536	0.005	0.109	0.0036	0.1218	0.0036	1953	28	1951	24	2089	66	1971	54	0.1	1951	24
LYH196-7	6.81	0.33	0.381	0.011	0.1206	0.0068	0.131	0.0062	2077	43	2079	51	2300	12	2120	81	0.1	2079	51
LYH196-61	7.51	0.41	0.3986	0.0096	0.1143	0.0089	0.1377	0.0072	2166	49	2161	44	2180	16	2178	91	0.2	2161	44
LYH196-67	7.69	0.18	0.4045	0.0036	0.1215	0.0039	0.1387	0.0027	2187	21	2189	17	2320	69	2213	34	0.1	2189	17
LYH196-27	8.12	0.15	0.4099	0.004	0.1207	0.0032	0.1428	0.0026	2242	17	2213	18	2299	58	2257	32	1.3	2213	18
LYH196-37	7.92	0.36	0.412	0.0054	0.1184	0.0052	0.1394	0.006	2227	42	2223	25	2258	93	2235	75	0.2	2223	25
LYH196-112	8.02	0.32	0.415	0.024	0.121	0.013	0.1409	0.0098	2232	37	2240	11	2310	23	2230	12	0.4	2240	110
LYH196-12	9.66	0.5	0.446	0.01	0.1222	0.0078	0.1562	0.008	2373	49	2373	45	2370	14	2382	86	0	2373	45
LYH196-25	9.98	0.18	0.4478	0.0051	0.1312	0.0029	0.1589	0.0023	2434	17	2384	23	2488	52	2445	24	2.1	2384	23
LYH196-45	9.99	0.72	0.457	0.023	0.138	0.018	0.16	0.013	2429	63	2426	99	2610	31	2490	15	0.1	2426	99
LYH196-110	10.04	0.22	0.4608	0.0045	0.1146	0.0022	0.1586	0.0026	2438	20	2442	20	2190	41	2442	28	0.2	2442	20
LYH196-52	10.13	0.39	0.461	0.014	0.1336	0.0077	0.1586	0.0066	2445	35	2444	60	2530	14	2470	71	0	2444	60
LYH196-19	10.12	0.36	0.461	0.012	0.126	0.012	0.1659	0.0084	2444	33	2445	54	2390	21	2511	86	0	2445	54
LYH196-38	10.38	0.58	0.4649	0.0088	0.1425	0.0068	0.1647	0.0087	2459	53	2460	39	2710	11	2482	86	0	2460	39
LYH196-116	10.28	0.67	0.465	0.025	0.126	0.019	0.1568	0.0067	2458	61	2460	11	2400	34	2419	74	0.1	2460	11
LYH196-40	10.48	0.32	0.464	0.012	0.163	0.011	0.164	0.0045	2471	28	2469	55	3040	19	2491	45	0.1	2469	55
LYH196-13	10.57	0.18	0.4703	0.0058	0.1441	0.0041	0.1634	0.0025	2484	16	2485	26	2723	73	2491	27	0	2485	26
LYH196-114	10.67	0.31	0.4714	0.0086	0.1238	0.004	0.1623	0.0047	2487	28	2487	38	2355	73	2479	50	0	2487	38
LYH196-70	10.7	0.18	0.4734	0.0049	0.1257	0.0058	0.1649	0.0027	2497	15	2499	21	2400	10	2507	28	0.1	2499	21
LYH196-58	10.83	0.49	0.476	0.01	0.1434	0.0061	0.1634	0.007	2503	43	2506	44	2700	11	2478	75	0.1	2506	44
LYH196-88	10.91	0.31	0.4756	0.0089	0.1373	0.0049	0.1667	0.0039	2510	27	2506	39	2597	88	2526	39	0.2	2506	39
LYH196-64	11.05	0.8	0.479	0.013	0.135	0.011	0.17	0.012	2518	71	2517	58	2550	20	2520	11	0	2517	58
LYH196-11	11.4	1.1	0.484	0.031	0.165	0.016	0.17	0.017	2538	96	2540	13	3080	27	2530	16	0.1	2540	130
LYH196-90	11.27	0.71	0.484	0.015	0.1222	0.0039	0.1695	0.0082	2543	59	2545	66	2330	71	2549	81	0.1	2545	66
LYH196-76	11.32	0.49	0.486	0.012	0.1393	0.0071	0.1647	0.0061	2550	41	2548	50	2630	13	2504	64	0.1	2548	50
LYH196-39	11.44	0.46	0.488	0.011	0.162	0.011	0.173	0.0064	2570	38	2567	47	3030	20	2584	59	0.1	2567	47
LYH196-103	11.58	0.16	0.4895	0.004	0.1276	0.0022	0.1726	0.0022	2570	13	2568	17	2426	39	2585	22	0.1	2568	17
LYH196-35	11.72	0.24	0.4915	0.0073	0.1423	0.0038	0.1741	0.0039	2579	19	2579	31	2687	67	2596	38	0	2579	31
LYH196-31	12.26	0.19	0.5018	0.0062	0.1368	0.0045	0.1787	0.0024	2624	15	2624	27	2585	8	2642	22	0	2624	27

## Sheet: Sample6
Analysis	Ratios								Ages								Discordance (%)	Best Age (Ma)
	207Pb/235U		206Pb/238U		208Pb/232Th		207Pb/206Pb		207Pb/235U		206Pb/238U		208Pb/232Th		207Pb/206Pb
		2 s.e.		2 s.e.		2 s.e.		2 s.e.		2 s.e.		2 s.e.		2 s.e.		2 s.e.			2 s.e.
LYH210-15	0.18	0.018	0.02632	0.0009	-0.00392	0.00032	0.0471	0.0045	167	15	167.4	5.6	79.4	6.5	90	18	0.2	167.4	5.6
LYH210-87	0.219	0.02	0.0308	0.00074	0.017	0.017	0.0497	0.0045	195	17	195.5	4.6	470	19	130	16	0.3	195.5	4.6
LYH210-117	0.226	0.011	0.03168	0.00049	0.0181	0.0026	0.0509	0.0025	204.9	9.3	201	3.1	360	51	220	9	1.9	201	3.1
LYH210-102	0.227	0.025	0.03178	0.00092	0.0162	0.0024	0.0533	0.0059	203	21	201.6	5.8	323	47	170	19	0.7	201.6	5.8
LYH210-83	0.221	0.015	0.03178	0.00062	0.0123	0.0013	0.0497	0.0034	202	12	202	3.8	246	26	190	13	0	202	3.8
LYH210-41	0.2198	0.0094	0.03196	0.0005	0.0119	0.0011	0.0502	0.0022	202.5	7.6	202.8	3.1	236	22	189	86	0.1	202.8	3.1
LYH210-77	0.228	0.015	0.03206	0.00065	0.027	0.012	0.0512	0.0032	206	12	203.4	4.1	390	18	270	12	1.3	203.4	4.1
LYH210-108	0.225	0.013	0.03232	0.0005	0.0319	0.007	0.049	0.0028	207	11	205	3.1	620	13	170	11	1	205	3.1
LYH210-97	0.23	0.012	0.03245	0.00058	0.0139	0.0016	0.0517	0.0028	208	10	205.8	3.6	279	31	260	10	1.1	205.8	3.6
LYH210-43	0.224	0.013	0.0326	0.00076	0.00587	0.00041	0.051	0.0029	206	11	206.8	4.8	118.3	8.2	240	12	0.4	206.8	4.8
LYH210-95	0.2277	0.0085	0.0327	0.00041	0.019	0.011	0.05	0.0017	207.1	7	207.4	2.6	410	12	199	67	0.1	207.4	2.6
LYH210-54	0.228	0.02	0.03297	0.00094	0.00737	0.00051	0.0507	0.0044	210	16	209.6	5.9	148	10	180	16	0.2	209.6	5.9
LYH210-49	0.2338	0.0071	0.03372	0.00035	0.024	0.016	0.0502	0.0016	213.2	5.8	213.8	2.2	490	11	193	65	0.3	213.8	2.2
LYH210-91	0.238	0.015	0.03385	0.00082	0.00868	0.0006	0.0504	0.0032	217	12	214.6	5.1	175	12	200	12	1.1	214.6	5.1
LYH210-86	0.238	0.012	0.03432	0.00052	0.0175	0.0024	0.0491	0.0025	216	9.3	217.5	3.2	349	47	163	97	0.7	217.5	3.2
LYH210-103	0.239	0.01	0.03432	0.00047	0.0174	0.0023	0.0509	0.0021	217.1	8.3	217.5	2.9	341	43	215	82	0.2	217.5	2.9
LYH210-52	0.2444	0.0082	0.03458	0.00049	0.01104	0.00091	0.0511	0.0018	221.8	6.6	219.1	3	222	18	235	72	1.2	219.1	3
LYH210-27	0.243	0.017	0.0349	0.001	0.0068	0.00051	0.0527	0.0038	220	13	221.2	6.3	137	10	270	14	0.5	221.2	6.3
LYH210-115	0.2429	0.0096	0.03503	0.00048	0.018	0.018	0.0503	0.002	220.1	7.7	221.9	3	370	19	204	76	0.8	221.9	3
LYH210-38	0.245	0.012	0.0352	0.00052	0.014	0.012	0.0501	0.0023	222.1	9.5	222.9	3.2	370	12	177	9	0.4	222.9	3.2
LYH210-89	0.2473	0.0092	0.03525	0.00055	0.019	0.012	0.0498	0.0019	223.7	7.6	223.2	3.4	430	17	202	74	0.2	223.2	3.4
LYH210-78	0.2519	0.0077	0.03541	0.00049	0.01112	0.00076	0.0505	0.0015	227.5	6.3	224.3	3.1	223	15	225	63	1.4	224.3	3.1
LYH210-5	0.251	0.018	0.03547	0.00077	0.00813	0.0005	0.0517	0.0038	224	15	224.6	4.8	164	10	230	14	0.3	224.6	4.8
LYH210-84	0.2541	0.0096	0.03564	0.00049	0.00961	0.00068	0.0528	0.002	229.8	7.6	225.7	3	193	14	298	78	1.8	225.7	3
LYH210-64	0.249	0.012	0.03568	0.00053	0.021	0.0094	0.0511	0.0025	225.4	9.7	226	3.3	400	14	231	91	0.3	226	3.3
LYH210-51	0.2589	0.0094	0.03685	0.00047	0.018	0.012	0.0509	0.0018	232.5	7.6	233.2	2.9	470	13	216	70	0.3	233.2	2.9
LYH210-53	0.2655	0.0075	0.03786	0.00038	0.0251	0.0075	0.0506	0.0014	239.8	6	239.7	2.4	520	12	209	58	0	239.7	2.4
LYH210-98	0.268	0.012	0.03802	0.00058	0.015	0.016	0.0528	0.0023	239.6	9.6	240.5	3.6	460	15	272	86	0.4	240.5	3.6
LYH210-26	0.285	0.011	0.03976	0.0006	0.01157	0.00096	0.0525	0.0021	255.6	8.9	251.3	3.7	232	19	284	81	1.7	251.3	3.7
LYH210-23	0.314	0.021	0.04297	0.00071	0.0193	0.0023	0.052	0.0035	272	16	271.1	4.4	383	45	260	13	0.3	271.1	4.4
LYH210-73	0.327	0.022	0.04572	0.00097	0.01145	0.0009	0.0516	0.0035	286	16	288.1	6	230	18	280	13	0.7	288.1	6
LYH210-82	0.337	0.025	0.0465	0.001	0.0185	0.002	0.0522	0.0039	291	19	292.7	6.4	369	39	240	14	0.6	292.7	6.4
LYH210-76	0.501	0.025	0.0655	0.0011	0.0359	0.0053	0.0566	0.003	411	18	408.7	6.6	683	9	390	11	0.6	408.7	6.6
LYH210-63	0.494	0.028	0.0655	0.0012	0.039	0.042	0.0558	0.0033	408	19	408.8	7.1	910	31	400	11	0.2	408.8	7.1
LYH210-56	0.5	0.036	0.0662	0.0017	0.09	0.053	0.0543	0.004	413	23	413	10	1500	52	360	14	0	413	10
LYH210-101	0.491	0.024	0.0664	0.0012	0.0243	0.002	0.055	0.0026	407	16	414.3	7.2	485	39	397	98	1.8	414.3	7.2
LYH210-9	0.5	0.015	0.06635	0.00075	0.0243	0.0025	0.0554	0.0016	413	10	414.5	4.5	476	47	407	62	0.4	414.5	4.5
LYH210-81	0.511	0.027	0.0678	0.0012	0.074	0.04	0.0542	0.0028	419	18	422.8	7.1	1300	39	350	10	0.9	422.8	7.1
LYH210-112	0.517	0.026	0.0684	0.0011	0.069	0.02	0.0539	0.0027	425	17	426.5	6.5	1090	23	329	99	0.4	426.5	6.5
LYH210-93	0.554	0.033	0.0699	0.0014	0.021	0.0017	0.0566	0.0035	440	22	435.1	8.4	418	34	450	12	1.1	435.1	8.4
LYH210-90	0.546	0.031	0.07	0.0011	0.0396	0.0058	0.0555	0.003	436	20	436.1	6.6	750	10	410	11	0	436.1	6.6
LYH210-1	0.539	0.021	0.0704	0.00069	0.0317	0.0045	0.0551	0.0021	435	14	438.5	4.1	622	85	389	79	0.8	438.5	4.1
LYH210-96	0.547	0.03	0.0705	0.0013	0.0367	0.0047	0.0562	0.003	438	20	438.8	7.6	706	85	400	11	0.2	438.8	7.6
LYH210-111	0.544	0.013	0.07049	0.00079	0.035	0.023	0.0556	0.0013	439.6	8.6	439	4.7	820	33	417	50	0.1	439	4.7
LYH210-33	0.545	0.019	0.07061	0.00091	0.063	0.022	0.0564	0.002	439	13	439.7	5.5	830	15	424	74	0.2	439.7	5.5
LYH210-67	0.547	0.023	0.0707	0.0016	0.019	0.0011	0.0568	0.0025	441	15	440.3	9.6	381	22	469	96	0.2	440.3	9.6
LYH210-8	0.549	0.022	0.0709	0.001	0.0328	0.0047	0.0553	0.0022	442	14	441.6	6.1	630	84	415	80	0.1	441.6	6.1
LYH210-60	0.547	0.035	0.0712	0.0012	0.0318	0.0038	0.0555	0.0036	445	23	443.3	7.4	607	69	430	13	0.4	443.3	7.4
LYH210-104	0.552	0.024	0.0713	0.0011	0.061	0.031	0.0566	0.0024	443	15	443.9	6.6	1220	30	437	85	0.2	443.9	6.6
LYH210-55	0.56	0.049	0.0713	0.0028	0.0137	0.0013	0.0585	0.0051	445	32	444	17	274	25	450	18	0.2	444	17
LYH210-29	0.559	0.022	0.07135	0.00093	0.0225	0.0018	0.0567	0.0022	448	15	444.2	5.6	449	35	478	83	0.9	444.2	5.6
LYH210-39	0.558	0.028	0.0716	0.0012	0.0401	0.0068	0.0559	0.0029	446	18	446.4	7.3	740	12	420	10	0.1	446.4	7.3
LYH210-88	0.564	0.032	0.0717	0.0014	0.0196	0.0018	0.0574	0.0033	449	21	446.5	8.2	392	35	430	12	0.6	446.5	8.2
LYH210-4	0.561	0.031	0.0718	0.0012	0.062	0.049	0.0558	0.0031	451	20	446.9	7	1050	25	430	11	0.9	446.9	7
LYH210-65	0.553	0.026	0.0718	0.0012	0.0362	0.0056	0.0562	0.0026	446	17	447	7.1	710	10	435	94	0.2	447	7.1
LYH210-79	0.562	0.02	0.07189	0.00093	0.0231	0.0018	0.0558	0.0019	451	13	447.4	5.6	460	36	427	71	0.8	447.4	5.6
LYH210-47	0.56	0.028	0.07188	0.00098	0.041	0.022	0.057	0.0029	451	17	447.9	6	960	22	433	99	0.7	447.9	6
LYH210-36	0.554	0.015	0.07201	0.00082	0.0222	0.0019	0.0556	0.0015	447	10	448.2	4.9	447	38	419	61	0.3	448.2	4.9
LYH210-70	0.558	0.02	0.072	0.001	0.031	0.039	0.0558	0.002	447	13	448.9	5.9	550	39	407	74	0.4	448.9	5.9
LYH210-35	0.558	0.013	0.0722	0.00087	0.0271	0.0027	0.0559	0.0012	449	8.4	449.3	5.2	532	51	442	46	0.1	449.3	5.2
LYH210-13	0.534	0.029	0.0723	0.0013	0.0231	0.0017	0.053	0.0029	432	20	449.7	8	460	34	320	11	3.9	449.7	8
LYH210-32	0.56	0.025	0.0724	0.0011	0.0314	0.0037	0.0561	0.0026	451	16	450.2	6.7	620	72	435	95	0.2	450.2	6.7
LYH210-16	0.55	0.019	0.07256	0.00087	0.041	0.047	0.055	0.002	448	12	451.4	5.2	940	18	405	76	0.8	451.4	5.2
LYH210-34	0.566	0.025	0.0726	0.0011	0.04	0.03	0.0556	0.0023	452	16	451.6	6.7	810	26	407	86	0.1	451.6	6.7
LYH210-28	0.572	0.019	0.073	0.001	0.0207	0.0014	0.0561	0.0018	457	12	455	6.3	413	28	425	70	0.4	455	6.3
LYH210-42	0.573	0.025	0.0732	0.0012	0.0229	0.0021	0.0579	0.0026	457	17	455.2	7	456	40	487	93	0.4	455.2	7
LYH210-12	0.567	0.029	0.0736	0.0015	0.01361	0.00081	0.0564	0.0028	454	18	457.7	9.1	273	16	450	11	0.8	457.7	9.1
LYH210-114	0.57	0.019	0.07355	0.00089	0.0439	0.0064	0.0566	0.0019	457	13	457.8	5.4	850	12	459	71	0.2	457.8	5.4
LYH210-58	0.573	0.018	0.0737	0.0011	0.038	0.045	0.0555	0.0017	458	12	458.4	6.4	820	42	420	67	0.1	458.4	6.4
LYH210-71	0.575	0.036	0.0739	0.0019	0.0162	0.001	0.0575	0.0037	462	23	459	12	324	21	450	13	0.7	459	12
LYH210-24	0.57	0.021	0.07424	0.00087	0.0302	0.0037	0.0556	0.0021	463	14	461.6	5.2	586	69	416	79	0.3	461.6	5.2
LYH210-22	0.584	0.038	0.0745	0.003	0.01239	0.00083	0.0586	0.004	464	24	463	18	249	17	520	15	0.2	463	18
LYH210-85	0.59	0.033	0.0746	0.0014	0.063	0.035	0.0576	0.0034	467	21	463.6	8.4	1090	23	500	12	0.7	463.6	8.4
LYH210-7	0.591	0.038	0.0752	0.0021	0.01338	0.00078	0.0574	0.004	470	24	467	13	271	16	440	14	0.6	467	13
LYH210-11	0.579	0.044	0.0751	0.0025	0.0139	0.00076	0.0568	0.0041	465	28	467	15	279	15	420	15	0.4	467	15
LYH210-2	0.594	0.02	0.07521	0.00087	0.0212	0.0017	0.0567	0.0018	472	13	467.4	5.2	424	33	486	68	1	467.4	5.2
LYH210-68	0.62	0.052	0.0754	0.0017	0.021	0.0022	0.0598	0.005	468	32	469	10	419	43	460	15	0.2	469	10
LYH210-50	0.6	0.028	0.0761	0.0019	0.0222	0.0018	0.0576	0.0027	472	17	473	11	442	35	478	94	0.2	473	11
LYH210-74	0.592	0.029	0.0785	0.0012	0.02	0.0013	0.0555	0.0029	469	18	486.9	7.4	399	26	370	10	3.7	486.9	7.4
LYH210-80	1.214	0.056	0.1344	0.002	0.0434	0.0031	0.0651	0.0028	809	25	812	12	857	60	759	86	0.4	812	12
LYH210-48	1.451	0.038	0.1504	0.0025	0.035	0.0022	0.0699	0.0017	907	16	903	14	695	43	922	47	0.4	903	14
LYH210-72	1.538	0.062	0.1551	0.0023	0.09	0.016	0.0696	0.0023	934	24	930	13	1520	22	906	69	0.4	930	13
LYH210-3	1.708	0.053	0.1697	0.0022	0.0627	0.0061	0.0724	0.0023	1011	20	1011	12	1220	11	995	62	0	1011	12
LYH210-121	2.142	0.065	0.1977	0.0027	0.092	0.011	0.0783	0.0023	1165	20	1165	15	1740	10	1158	58	0	1165	15
LYH210-75	3.42	0.27	0.249	0.014	0.0685	0.0057	0.101	0.0076	1518	61	1462	59	1330	11	1640	13	3.8	1462	59
LYH210-100	4.42	0.16	0.3027	0.0057	0.199	0.032	0.1089	0.0033	1709	31	1705	28	3300	43	1751	56	0.2	1705	28
LYH210-31	4.433	0.088	0.3047	0.003	0.159	0.027	0.105	0.0019	1716	16	1715	15	2650	37	1717	34	0.1	1715	15
LYH210-37	4.48	0.27	0.306	0.013	0.0814	0.0066	0.1076	0.0037	1724	48	1726	63	1580	12	1749	67	0.1	1726	63
LYH210-46	4.597	0.098	0.3114	0.0037	0.25	0.16	0.1075	0.0023	1746	18	1746	18	3290	51	1758	40	0	1746	18
LYH210-45	4.66	0.12	0.3124	0.0041	0.18	0.1	0.1091	0.0028	1754	22	1755	20	2750	38	1774	48	0.1	1755	20
LYH210-62	5.09	0.11	0.3285	0.0033	0.22	0.12	0.1116	0.0024	1831	19	1830	16	2990	43	1821	38	0.1	1830	16
LYH210-19	5	0.21	0.3291	0.007	0.241	0.054	0.1098	0.0049	1830	35	1831	34	3680	55	1783	81	0.1	1831	34
LYH210-61	5.09	0.17	0.3302	0.0046	0.212	0.086	0.11	0.0036	1833	28	1838	22	3830	57	1801	61	0.3	1838	22
LYH210-120	5.348	0.076	0.3362	0.0033	0.18	0.12	0.1144	0.0015	1873	12	1869	16	3570	51	1861	24	0.2	1869	16
LYH210-14	5.58	0.16	0.3458	0.0055	0.166	0.027	0.1172	0.0034	1913	25	1912	26	2730	35	1910	52	0.1	1912	26
LYH210-10	5.58	0.11	0.3453	0.0036	0.167	0.028	0.1174	0.002	1913	18	1913	17	2720	34	1906	31	0	1913	17
LYH210-18	5.6	0.1	0.3457	0.0038	0.23	0.12	0.1178	0.0021	1915	16	1915	18	4040	68	1923	33	0	1915	18
LYH210-118	6.24	0.21	0.3647	0.0076	0.0836	0.0039	0.1257	0.0036	2010	29	2011	36	1620	72	2023	52	0	2011	36
LYH210-57	6.33	0.29	0.3683	0.0067	0.148	0.011	0.1245	0.0049	2017	39	2020	31	2770	18	2008	72	0.1	2020	31
LYH210-119	8.9	0.18	0.4328	0.005	0.159	0.014	0.1488	0.0028	2323	18	2323	22	2930	24	2339	32	0	2323	22
LYH210-17	9.34	0.24	0.4434	0.0057	0.163	0.019	0.1529	0.0038	2370	24	2368	26	2910	29	2388	42	0.1	2368	26
LYH210-30	9.91	0.36	0.451	0.01	0.1206	0.0054	0.1598	0.006	2423	33	2399	45	2341	98	2445	64	1	2399	45
LYH210-59	10.27	0.25	0.4664	0.0084	0.088	0.0044	0.1615	0.003	2466	22	2466	37	1701	81	2472	32	0	2466	37
LYH210-21	10.51	0.24	0.4696	0.006	0.218	0.024	0.1595	0.0037	2478	22	2480	26	3900	38	2446	37	0.1	2480	26
LYH210-44	10.7	0.36	0.4718	0.0076	0.31	0.29	0.163	0.0051	2496	33	2495	34	4680	63	2477	53	0	2495	34
LYH210-20	11.14	0.27	0.4819	0.0064	0.18	0.021	0.1667	0.0039	2533	22	2533	28	3240	33	2520	40	0	2533	28
LYH210-113	11.41	0.26	0.4848	0.0077	0.155	0.012	0.1709	0.0037	2553	21	2548	34	2870	20	2561	37	0.2	2548	34
LYH210-66	11.68	0.55	0.4915	0.0099	0.222	0.018	0.1704	0.0071	2581	43	2581	42	4020	30	2561	71	0	2581	42

## Sheet: Sample7
Analysis	Ratios								Ages								Discordance (%)	Best Age (Ma)
	207Pb/235U		206Pb/238U		208Pb/232Th		207Pb/206Pb		207Pb/235U		206Pb/238U		208Pb/232Th		207Pb/206Pb
		2 s.e.		2 s.e.		2 s.e.		2 s.e.		2 s.e.		2 s.e.		2 s.e.		2 s.e.			2 s.e.
LYH259-7	0.1672	0.0081	0.02528	0.00035	0.00763	0.00054	0.0477	0.0023	157.1	7	160.9	2.2	153	11	102	89	2.4	160.9	2.2
LYH259-14	0.189	0.012	0.02715	0.00088	0.00932	0.00048	0.0509	0.0028	173.3	9.8	172.6	5.5	187.4	9.6	230	10	0.4	172.6	5.5
LYH259-29	0.208	0.025	0.02921	0.00098	0.00941	0.00078	0.0503	0.0058	187	21	185.5	6.1	189	16	220	21	0.8	185.5	6.1
LYH259-9	0.245	0.028	0.03551	0.00097	0.0114	0.0011	0.0499	0.0061	224	22	224.9	6.1	229	22	190	21	0.4	224.9	6.1
LYH259-17	0.24	0.069	0.0355	0.0029	0.0108	0.0013	0.056	0.016	224	60	225	18	216	26	250	54	0.4	225	18
LYH259-105	0.268	0.037	0.0375	0.0029	0.0111	0.0023	0.0514	0.0052	240	29	238	18	223	46	240	21	0.8	238	18
LYH259-108	0.279	0.045	0.0399	0.0013	0.012	0.0014	0.0506	0.0085	253	37	252.4	7.9	242	27	210	30	0.2	252.4	7.9
LYH259-42	0.294	0.015	0.04147	0.0007	0.01256	0.00059	0.0505	0.0025	261	12	261.9	4.3	252	12	239	94	0.3	261.9	4.3
LYH259-23	0.3	0.03	0.04169	0.00084	0.01274	0.00085	0.0511	0.0049	260	23	263.2	5.2	256	17	160	17	1.2	263.2	5.2
LYH259-30	0.296	0.047	0.0425	0.0016	0.0131	0.0011	0.0537	0.009	268	40	268	9.9	262	22	330	34	0	268	9.9
LYH259-35	0.33	0.037	0.0437	0.0013	0.014	0.0013	0.0542	0.0064	276	28	275.7	7.9	280	26	240	21	0.1	275.7	7.9
LYH259-76	0.33	0.15	0.0449	0.0079	0.0161	0.0046	0.053	0.023	280	12	283	49	323	91	260	85	1.1	283	49
LYH259-12	0.343	0.074	0.0464	0.0023	0.0131	0.0029	0.055	0.011	296	59	292	14	263	59	310	40	1.4	292	14
LYH259-72	0.352	0.038	0.047	0.0012	0.014	0.00099	0.054	0.0054	300	28	296.3	7.6	281	20	330	19	1.2	296.3	7.6
LYH259-38	0.364	0.032	0.0502	0.0014	0.0161	0.0022	0.0535	0.005	313	23	315.6	8.6	323	43	290	17	0.8	315.6	8.6
LYH259-77	0.387	0.051	0.0501	0.002	0.0144	0.0014	0.0548	0.0072	320	37	316	12	292	29	290	24	1.3	316	12
LYH259-100	0.4	0.23	0.0504	0.0047	0.0183	0.007	0.058	0.034	320	18	317	29	370	14	300	12	0.9	317	29
LYH259-73	0.387	0.092	0.0515	0.003	0.0177	0.0038	0.057	0.014	327	71	323	18	354	76	290	45	1.2	323	18
LYH259-1	0.4	0.038	0.0527	0.0012	0.0174	0.0012	0.0546	0.005	335	27	331	7	348	23	290	17	1.2	331	7
LYH259-93	0.422	0.033	0.0577	0.0013	0.018	0.0016	0.0534	0.0043	364	23	361.2	7.9	359	31	270	15	0.8	361.2	7.9
LYH259-102	0.46	0.14	0.061	0.0059	0.0211	0.008	0.055	0.016	379	99	381	36	420	16	330	60	0.5	381	36
LYH259-15	0.494	0.028	0.0639	0.0014	0.021	0.0017	0.0568	0.003	401	19	400.1	8.7	418	34	460	11	0.2	400.1	8.7
LYH259-67	0.515	0.086	0.0668	0.0043	0.0203	0.0051	0.0542	0.0084	419	60	417	26	410	10	350	34	0.5	417	26
LYH259-91	0.533	0.071	0.0675	0.0017	0.0213	0.0024	0.0576	0.0076	425	49	421	10	426	47	430	27	1	421	10
LYH259-28	0.537	0.035	0.0683	0.0013	0.02111	0.00073	0.0571	0.0036	426	23	425.7	7.8	422	15	430	12	0.1	425.7	7.8
LYH259-96	0.536	0.051	0.0689	0.0017	0.021	0.0013	0.056	0.0051	433	35	429	10	420	25	390	18	0.9	429	10
LYH259-53	0.544	0.087	0.0689	0.0027	0.0264	0.0043	0.0583	0.0095	426	57	430	16	524	85	410	31	0.9	430	16
LYH259-13	0.532	0.029	0.0691	0.0012	0.023	0.001	0.0555	0.0033	434	20	431.4	7.2	458	20	390	11	0.6	431.4	7.2
LYH259-6	0.546	0.037	0.0711	0.0011	0.0256	0.0028	0.0547	0.0037	439	24	442.4	6.3	509	55	360	13	0.8	442.4	6.3
LYH259-20	0.544	0.043	0.0714	0.0015	0.0208	0.0013	0.0549	0.0036	445	28	444.5	9.3	416	26	430	14	0.1	444.5	9.3
LYH259-31	0.532	0.042	0.0714	0.0017	0.0219	0.0014	0.054	0.0045	441	28	445	10	437	27	400	16	0.9	445	10
LYH259-92	0.556	0.051	0.0722	0.002	0.0243	0.0018	0.0574	0.0055	451	31	449	12	484	35	450	18	0.4	449	12
LYH259-39	0.58	0.054	0.0727	0.0018	0.0237	0.0017	0.0574	0.0053	451	34	452	11	472	33	400	17	0.2	452	11
LYH259-22	0.593	0.058	0.0738	0.0019	0.0212	0.0012	0.0593	0.0059	457	38	459	12	424	24	350	18	0.4	459	12
LYH259-49	0.6	0.076	0.0747	0.0028	0.0226	0.0024	0.0578	0.0072	466	48	464	17	450	47	530	25	0.4	464	17
LYH259-103	0.61	0.1	0.075	0.0035	0.0241	0.0028	0.06	0.01	466	65	466	21	481	55	440	31	0	466	21
LYH259-58	0.589	0.04	0.0757	0.0014	0.0235	0.0013	0.0564	0.0037	474	26	470.3	8.3	470	25	420	13	0.8	470.3	8.3
LYH259-41	0.61	0.036	0.0762	0.0013	0.0241	0.001	0.0572	0.0032	475	22	472.9	7.8	480	20	460	11	0.4	472.9	7.8
LYH259-86	0.609	0.034	0.0771	0.0018	0.0248	0.0011	0.0593	0.0038	474	21	478	11	494	22	410	11	0.8	478	11
LYH259-97	0.692	0.069	0.0839	0.0024	0.0288	0.0025	0.0599	0.0054	523	40	519	14	574	49	540	19	0.8	519	14
LYH259-89	0.815	0.096	0.0972	0.0029	0.0356	0.0046	0.0607	0.0068	599	54	598	17	706	9	570	24	0.2	598	17
LYH259-114	0.89	0.18	0.1005	0.0046	0.1	0.079	0.063	0.013	618	98	617	27	1220	79	510	40	0.2	617	27
LYH259-37	0.855	0.087	0.1007	0.0029	0.0331	0.0027	0.0624	0.0059	619	48	618	17	656	53	640	19	0.2	618	17
LYH259-110	0.96	0.33	0.107	0.013	0.037	0.0077	0.064	0.018	660	17	657	77	730	15	590	59	0.5	657	77
LYH259-121	1.03	0.18	0.1155	0.0052	0.035	0.012	0.066	0.013	709	88	705	30	700	23	810	41	0.6	705	30
LYH259-83	1.13	0.31	0.125	0.012	0.036	0.015	0.066	0.016	750	16	757	68	710	29	720	55	0.9	757	68
LYH259-119	1.15	0.17	0.1285	0.0067	0.0581	0.0096	0.066	0.01	782	85	779	38	1140	18	690	33	0.4	779	38
LYH259-85	1.217	0.068	0.131	0.0022	0.0438	0.0024	0.067	0.0036	797	31	793	13	865	46	780	11	0.5	793	13
LYH259-50	1.2	0.1	0.1321	0.0038	0.0421	0.0031	0.0656	0.0052	804	48	803	23	832	60	800	17	0.1	803	23
LYH259-112	1.28	0.11	0.1355	0.0033	0.0397	0.0037	0.0672	0.0058	822	51	819	19	785	71	770	19	0.4	819	19
LYH259-32	1.34	0.17	0.1403	0.0042	0.0404	0.0072	0.0701	0.0085	848	76	846	23	790	14	740	25	0.2	846	23
LYH259-120	1.36	0.14	0.1435	0.0048	0.0391	0.003	0.0717	0.008	862	60	864	27	775	58	870	24	0.2	864	27
LYH259-19	1.415	0.093	0.1452	0.0034	0.0433	0.0023	0.0705	0.0042	876	38	874	19	860	45	850	13	0.2	874	19
LYH259-56	1.56	0.32	0.151	0.012	0.056	0.012	0.075	0.016	900	13	905	65	1100	24	770	42	0.6	905	65
LYH259-109	1.49	0.2	0.151	0.0063	0.0423	0.0077	0.0708	0.0094	904	85	906	35	830	15	860	29	0.2	906	35
LYH259-70	1.53	0.25	0.151	0.0057	0.0592	0.0072	0.072	0.011	916	96	913	33	1160	14	820	29	0.3	913	33
LYH259-61	1.46	0.13	0.1534	0.0037	0.0431	0.0041	0.0679	0.0063	923	55	919	21	850	79	840	19	0.4	919	21
LYH259-34	1.47	0.13	0.1528	0.0077	0.0446	0.0033	0.0697	0.0048	921	53	921	42	880	63	930	15	0	921	42
LYH259-27	1.48	0.089	0.1543	0.0031	0.0453	0.0032	0.0704	0.0045	929	37	925	17	894	62	920	13	0.4	925	17
LYH259-79	1.524	0.084	0.1547	0.0025	0.0493	0.0022	0.0718	0.0036	927	35	927	14	971	42	960	10	0	927	14
LYH259-24	1.63	0.087	0.1622	0.0029	0.0529	0.0024	0.0712	0.0034	968	34	970	16	1045	47	930	10	0.2	970	16
LYH259-33	1.659	0.074	0.1654	0.0026	0.0535	0.0023	0.0728	0.0032	991	28	987	15	1050	44	973	91	0.4	987	15
LYH259-2	1.653	0.046	0.1657	0.0022	0.046	0.0039	0.0713	0.0019	986	18	989	12	909	75	958	54	0.3	989	12
LYH259-78	1.7	0.21	0.173	0.0076	0.054	0.011	0.0698	0.0086	1028	95	1028	42	1060	20	940	31	0	1028	42
LYH259-64	1.84	0.38	0.1734	0.0085	0.0515	0.0071	0.076	0.014	1030	13	1030	47	1010	14	930	40	0	1030	47
LYH259-21	1.89	0.55	0.178	0.019	0.051	0.011	0.079	0.026	1050	19	1050	10	1000	21	960	68	0	1050	10
LYH259-47	1.87	0.24	0.178	0.005	0.0692	0.0076	0.0741	0.0089	1055	86	1055	27	1350	14	930	25	0	1055	27
LYH259-18	1.87	0.26	0.1782	0.0078	0.0506	0.0063	0.076	0.01	1063	96	1063	41	1000	12	1030	27	0	1063	41
LYH259-3	1.96	0.23	0.1837	0.0079	0.0651	0.0093	0.077	0.01	1090	81	1087	43	1270	18	1020	28	0.3	1087	43
LYH259-84	1.98	0.19	0.1841	0.0056	0.0584	0.0043	0.0767	0.0069	1086	65	1088	30	1145	81	1010	19	0.2	1088	30
LYH259-48	2.38	0.55	0.206	0.014	0.062	0.014	0.083	0.02	1210	18	1209	77	1210	27	1120	56	0.1	1209	77
LYH259-52	2.7	0.34	0.2302	0.0091	0.0521	0.0052	0.085	0.011	1339	94	1334	48	1025	99	1330	24	0.4	1334	48
LYH259-45	2.82	0.2	0.2354	0.0093	0.0686	0.0063	0.0857	0.0053	1365	56	1362	48	1340	12	1330	12	0.2	1362	48
LYH259-87	2.98	0.29	0.2373	0.0082	0.0597	0.0069	0.0903	0.0078	1373	72	1371	43	1170	13	1480	10	0.1	1371	43
LYH259-90	2.99	0.32	0.2378	0.0087	0.0637	0.0058	0.0897	0.0086	1376	83	1374	45	1240	11	1350	19	0.1	1374	45
LYH259-57	3.08	0.21	0.242	0.01	0.0862	0.0068	0.0917	0.0042	1394	53	1390	52	1670	13	1427	87	0.3	1390	52
LYH259-104	3.5	1.2	0.26	0.014	0.0594	0.0051	0.101	0.035	1490	28	1489	73	1167	97	1440	77	0.1	1489	73
LYH259-8	3.84	0.13	0.2792	0.0031	0.0784	0.0027	0.0979	0.0031	1591	27	1586	16	1523	50	1568	59	0.3	1586	16
LYH259-26	3.95	0.48	0.28	0.01	0.0847	0.0062	0.099	0.01	1593	99	1589	50	1640	11	1610	20	0.3	1589	50
LYH259-106	4.04	0.48	0.2844	0.0095	0.0835	0.0068	0.099	0.01	1611	97	1612	48	1620	13	1610	22	0.1	1612	48
LYH259-82	4.01	0.14	0.2885	0.004	0.0859	0.0029	0.0997	0.0034	1631	29	1633	20	1668	54	1632	64	0.1	1633	20
LYH259-40	4.19	0.42	0.2921	0.0073	0.0889	0.0081	0.1047	0.0096	1650	83	1651	36	1720	15	1630	18	0.1	1651	36
LYH259-68	4.13	0.12	0.293	0.0027	0.0835	0.0039	0.1022	0.0027	1654	23	1657	13	1614	73	1654	50	0.2	1657	13
LYH259-71	4.83	0.97	0.309	0.014	0.087	0.011	0.114	0.02	1740	17	1733	68	1670	20	1730	33	0.4	1733	68
LYH259-44	4.57	0.19	0.3108	0.0062	0.0904	0.0039	0.1077	0.0042	1742	34	1743	31	1747	72	1737	71	0.1	1743	31
LYH259-11	5.29	0.33	0.3346	0.0096	0.0868	0.007	0.1137	0.0069	1855	54	1857	46	1660	13	1780	11	0.1	1857	46
LYH259-25	5.9	1.4	0.348	0.026	0.085	0.022	0.118	0.025	1920	20	1920	12	1640	41	1810	41	0	1920	12
LYH259-115	6.5	1.5	0.368	0.043	0.067	0.03	0.128	0.019	2010	21	2010	20	1310	56	2040	27	0	2010	20
LYH259-88	6.9	0.79	0.383	0.026	0.125	0.015	0.133	0.017	2090	10	2090	12	2390	27	2120	22	0	2090	12
LYH259-95	6.9	0.43	0.3859	0.0082	0.114	0.0068	0.1303	0.0077	2100	57	2101	38	2170	12	2080	10	0	2101	38
LYH259-66	8.1	2	0.405	0.021	0.117	0.016	0.141	0.03	2190	22	2189	95	2240	28	2130	37	0	2189	95
LYH259-10	8.07	0.22	0.4149	0.0071	0.1214	0.0028	0.1402	0.003	2231	25	2233	33	2326	52	2223	37	0.1	2233	33
LYH259-99	10.9	2.8	0.462	0.031	0.112	0.025	0.168	0.041	2450	25	2440	14	2140	46	2400	43	0.4	2440	14
LYH259-74	10.47	0.82	0.465	0.01	0.147	0.016	0.163	0.013	2464	73	2462	44	2770	28	2460	13	0.1	2462	44
LYH259-59	10.71	0.92	0.466	0.017	0.099	0.011	0.169	0.013	2484	78	2482	78	1900	20	2520	13	0.1	2482	78
LYH259-116	11.13	0.9	0.4764	0.0075	0.1388	0.0058	0.17	0.014	2513	75	2511	33	2630	10	2530	14	0.1	2511	33
LYH259-5	11.2	0.45	0.4811	0.0077	0.1363	0.0055	0.1649	0.0066	2531	38	2531	33	2579	99	2487	13	0	2531	33

## Sheet: Sheet1
Table 3 U-Pb isotopic ratios and ages of detrital zircons from the Core LYH
Analysis	Ratios								ages				Discordance (%)
	207Pb/235U		206Pb/238U		208Pb/232Th		207Pb/206Pb		206Pb/238U		207Pb/206Pb
		2 s.e.		2 s.e.		2 s.e.		2 s.e.		2 s.e.		2 s.e.
LYH-1
LYH-1-1	0.164	0.044	0.0235	0.0011	0.0078	0.0013	0.05	0.013	149.4	6.7	110	43	0.3
LYH-1-2	0.272	0.063	0.0342	0.0021	0.0114	0.0022	0.056	0.014	216	13	130	39	0
LYH-1-3	0.236	0.032	0.0343	0.0014	0.0116	0.0017	0.048	0.0067	217.5	8.4	210	25	1.6
LYH-1-4	0.269	0.016	0.03779	0.00059	0.01198	0.00044	0.0518	0.003	239.1	3.7	280	11	1.2
LYH-1-5	0.263	0.029	0.0381	0.0013	0.012	0.0014	0.0482	0.0057	240.9	7.9	160	22	0.4
LYH-1-6	0.278	0.015	0.03963	0.00048	0.0125	0.0005	0.0512	0.0026	250.5	3	211	9.8	0.6
LYH-1-7	0.292	0.026	0.04039	0.00094	0.01273	0.00094	0.0508	0.0046	255.7	5.9	160	16	1.4
LYH-1-8	0.291	0.033	0.0424	0.0015	0.014	0.001	0.0506	0.006	267.5	9.4	270	21	0.6
LYH-1-9	0.323	0.035	0.0429	0.0014	0.01563	0.00096	0.0543	0.0059	270.8	8.5	300	20	1.2
LYH-1-10	0.309	0.022	0.04301	0.00076	0.01347	0.00067	0.0519	0.0036	272	4.6	250	13	0
LYH-1-11	0.328	0.068	0.0433	0.0017	0.0124	0.0016	0.053	0.011	273	10	230	37	0.7
LYH-1-12	0.316	0.026	0.0444	0.0011	0.0143	0.001	0.0539	0.0046	280.1	6.7	270	16	1.1
LYH-1-13	0.321	0.018	0.04452	0.00065	0.01396	0.00067	0.0532	0.0029	280.7	4	300	10	1.2
LYH-1-14	0.324	0.039	0.0449	0.0017	0.0133	0.0016	0.0533	0.0066	283	10	270	22	0.7
LYH-1-15	0.326	0.051	0.0451	0.0017	0.0149	0.0015	0.0539	0.0083	284	10	350	29	0.4
LYH-1-16	0.329	0.039	0.0454	0.0012	0.01597	0.00092	0.0533	0.0063	286.2	7.5	240	21	0.3
LYH-1-17	0.333	0.019	0.04577	0.00068	0.01446	0.00087	0.0532	0.0032	288.5	4.2	320	11	1.2
LYH-1-18	0.325	0.028	0.0462	0.0015	0.0148	0.0038	0.0532	0.005	291.1	9.3	320	18	0
LYH-1-19	0.345	0.033	0.0469	0.0012	0.0158	0.0013	0.0526	0.0052	295.3	7.4	200	17	1.5
LYH-1-20	0.336	0.019	0.04748	0.00063	0.01588	0.00066	0.0519	0.0028	299.4	3.9	240	10	0.1
LYH-1-21	0.375	0.04	0.0495	0.0017	0.0175	0.0018	0.0558	0.0063	311	10	260	20	1
LYH-1-22	0.368	0.03	0.0495	0.0011	0.01631	0.00083	0.0546	0.0047	311.1	6.9	250	15	0.4
LYH-1-23	0.381	0.028	0.0523	0.001	0.0194	0.0014	0.0544	0.0042	329.3	6.3	340	15	0.7
LYH-1-24	0.399	0.033	0.0532	0.0014	0.0162	0.0013	0.0549	0.0046	334.2	8.4	330	17	0.5
LYH-1-25	0.394	0.067	0.0535	0.0041	0.018	0.0037	0.0527	0.0092	335	25	260	35	1.2
LYH-1-26	0.424	0.031	0.0562	0.0011	0.0189	0.0013	0.0559	0.0042	353.4	6.7	350	15	1
LYH-1-27	0.45	0.048	0.0621	0.0025	0.0185	0.0021	0.0536	0.0058	388	15	430	19	0.5
LYH-1-28	0.482	0.032	0.0634	0.0012	0.0208	0.0013	0.0555	0.0039	397	7.3	360	14	0.8
LYH-1-29	0.49	0.045	0.0643	0.002	0.0182	0.0017	0.0567	0.005	402	12	400	18	0.7
LYH-1-30	0.512	0.031	0.0676	0.0017	0.0221	0.002	0.0548	0.0037	422	10	360	14	0.5
LYH-1-31	0.509	0.026	0.06786	0.00091	0.02181	0.0007	0.0531	0.0026	423.2	5.5	340	10	0.8
LYH-1-32	0.527	0.049	0.068	0.002	0.0215	0.002	0.0556	0.0041	424	12	450	14	0.7
LYH-1-33	0.521	0.029	0.0687	0.0012	0.0217	0.001	0.0562	0.0033	428.2	7.2	420	10	0.7
LYH-1-34	0.565	0.077	0.0706	0.0031	0.0239	0.0031	0.059	0.0084	439	18	420	26	1.1
LYH-1-35	0.55	0.054	0.0711	0.0016	0.0222	0.0021	0.0555	0.0054	442.6	9.3	410	19	0.1
LYH-1-36	0.58	0.042	0.0721	0.0015	0.0221	0.0014	0.0594	0.0044	448.3	9.1	440	14	0.8
LYH-1-37	0.561	0.032	0.07251	0.00084	0.02349	0.00085	0.0562	0.003	451.2	5	400	11	0.9
LYH-1-38	0.564	0.038	0.0727	0.0019	0.0215	0.0013	0.0562	0.0041	452	12	410	14	0.2
LYH-1-39	0.575	0.029	0.075	0.001	0.02372	0.0009	0.0564	0.0029	465.8	6	430	10	0.6
LYH-1-40	0.608	0.098	0.075	0.0032	0.0231	0.0033	0.061	0.01	466	19	450	32	0.4
LYH-1-41	0.586	0.047	0.0751	0.0022	0.0239	0.0014	0.0564	0.004	467	13	440	14	0
LYH-1-42	0.595	0.025	0.0754	0.0011	0.02462	0.00092	0.0573	0.0026	468.5	6.8	468	94	0.3
LYH-1-43	0.59	0.024	0.0758	0.0011	0.0261	0.001	0.0559	0.0023	470.6	6.4	412	87	0.1
LYH-1-44	0.609	0.026	0.07705	0.00083	0.02352	0.00069	0.057	0.0022	478.4	5	445	81	0.5
LYH-1-45	0.624	0.021	0.0791	0.00092	0.0242	0.0006	0.0579	0.0019	490.6	5.5	520	72	0.1
LYH-1-46	0.645	0.028	0.0817	0.0018	0.0268	0.0013	0.058	0.0026	506	11	511	97	0
LYH-1-47	0.678	0.078	0.0875	0.0054	0.0265	0.0039	0.0548	0.0096	540	32	510	33	0.4
LYH-1-48	0.724	0.046	0.0896	0.0022	0.0321	0.0017	0.0584	0.0037	554	13	510	13	0.4
LYH-1-49	0.832	0.034	0.0991	0.002	0.0343	0.0018	0.0604	0.0024	612	12	619	84	0
LYH-1-50	1.008	0.078	0.113	0.0012	0.036	0.0021	0.0628	0.0045	691.1	6.7	590	15	0.2
LYH-1-51	1.007	0.083	0.1159	0.0025	0.0505	0.0058	0.0636	0.0051	706	15	680	17	0.4
LYH-1-52	1.128	0.077	0.125	0.0032	0.041	0.0022	0.0648	0.0042	759	18	740	14	0.1
LYH-1-53	1.32	0.12	0.1404	0.0032	0.0406	0.0022	0.0685	0.0059	847	18	810	19	0.4
LYH-1-54	1.409	0.075	0.1479	0.0021	0.0478	0.002	0.0688	0.0036	889	12	840	11	0.1
LYH-1-55	1.441	0.048	0.1504	0.0022	0.0525	0.0041	0.0698	0.0024	903	12	914	67	0.1
LYH-1-56	1.452	0.094	0.1514	0.0027	0.0464	0.0026	0.0708	0.0046	908	15	890	13	0.3
LYH-1-57	1.463	0.089	0.1521	0.0032	0.0581	0.0047	0.0717	0.0045	912	18	960	13	0.8
LYH-1-58	1.492	0.034	0.1544	0.0017	0.0531	0.0025	0.0701	0.0014	926.2	9.7	916	41	0.2
LYH-1-59	1.58	0.21	0.1609	0.004	0.0474	0.0046	0.0736	0.0092	962	22	920	25	0.1
LYH-1-60	1.62	0.077	0.1617	0.0026	0.0502	0.002	0.0719	0.0035	966	14	930	11	0.2
LYH-1-61	1.591	0.054	0.1621	0.0024	0.0509	0.0023	0.0701	0.0025	968	13	916	76	0.2
LYH-1-62	1.68	0.12	0.1661	0.0027	0.051	0.003	0.0736	0.005	990	15	980	14	0.3
LYH-1-63	1.893	0.051	0.1831	0.0019	0.0567	0.0013	0.0751	0.0023	1084	11	1077	6	0.3
LYH-1-64	1.93	0.26	0.1856	0.0043	0.0535	0.0053	0.077	0.01	1097	23	1000	26	0.1
LYH-1-65	2.137	0.099	0.1957	0.0028	0.0668	0.0032	0.0798	0.0034	1152	15	1135	8	0.3
LYH-1-66	2.145	0.058	0.1983	0.0023	0.0626	0.0018	0.0785	0.0019	1166	12	1166	47	0.1
LYH-1-67	2.45	0.3	0.2031	0.0077	0.061	0.0068	0.085	0.01	1189	41	1110	25	0.2
LYH-1-68	2.36	0.12	0.2081	0.0027	0.0634	0.0019	0.0822	0.0038	1220	14	1186	9	0.2
LYH-1-69	3.1	0.12	0.2482	0.004	0.0758	0.0029	0.0908	0.0033	1428	21	1439	65	0.1
LYH-1-70	3.08	0.11	0.2498	0.0043	0.0793	0.0043	0.0907	0.0038	1437	22	1458	8	0.1
LYH-1-71	3.16	0.21	0.2502	0.0073	0.0752	0.0092	0.0925	0.0055	1439	38	1460	12	0.2
LYH-1-72	3.37	0.11	0.2601	0.0058	0.0915	0.0088	0.0938	0.0026	1490	30	1491	54	0.2
LYH-1-73	3.5	0.19	0.266	0.0067	0.0792	0.0056	0.0941	0.005	1519	34	1480	10	0.1
LYH-1-74	3.65	0.37	0.2719	0.0066	0.0809	0.0053	0.094	0.0089	1549	33	1460	19	0.1
LYH-1-75	4.08	0.23	0.2924	0.0072	0.099	0.0079	0.1042	0.006	1653	36	1690	10	0
LYH-1-76	4.32	0.22	0.2996	0.0069	0.0976	0.0074	0.1048	0.0056	1689	34	1680	10	0
LYH-1-77	4.6	0.81	0.308	0.011	0.112	0.015	0.109	0.019	1731	53	1810	36	0.1
LYH-1-78	4.59	0.42	0.311	0.01	0.0994	0.0086	0.11	0.01	1750	51	1830	16	0.2
LYH-1-79	4.69	0.52	0.313	0.011	0.093	0.01	0.104	0.011	1756	53	1730	21	0.2
LYH-1-80	4.75	0.31	0.3195	0.0079	0.0969	0.0069	0.1118	0.0071	1785	39	1820	12	0.1
LYH-1-81	4.86	0.31	0.3215	0.0079	0.0889	0.0048	0.1107	0.007	1799	39	1820	10	0.1
LYH-1-82	4.89	0.3	0.3247	0.0082	0.0997	0.0068	0.1082	0.0061	1811	40	1760	10	0.1
LYH-1-83	5.17	0.49	0.329	0.02	0.101	0.011	0.116	0.012	1832	98	1820	20	0.1
LYH-1-84	5.43	0.3	0.333	0.003	0.0937	0.0039	0.1158	0.006	1852	14	1802	93	0.2
LYH-1-85	5.47	0.68	0.3332	0.0076	0.0892	0.0071	0.118	0.013	1853	36	1810	20	0.2
LYH-1-86	5.21	0.18	0.3342	0.006	0.0557	0.0034	0.1172	0.0034	1861	28	1898	53	0.1
LYH-1-87	5.3	0.23	0.336	0.015	0.105	0.011	0.1161	0.0063	1862	72	1917	96	0.1
LYH-1-88	5.31	0.22	0.3368	0.0082	0.0898	0.0049	0.1165	0.0048	1869	40	1878	78	0.1
LYH-1-89	5.34	0.41	0.3374	0.0079	0.0998	0.0067	0.1171	0.009	1872	38	1840	14	0.2
LYH-1-90	5.33	0.34	0.3392	0.007	0.0971	0.0069	0.1154	0.0084	1883	33	1850	13	0.3
LYH-1-91	5.43	0.22	0.3403	0.0045	0.098	0.0071	0.1156	0.0053	1888	22	1870	84	0.2
LYH-1-92	5.66	0.53	0.3438	0.0081	0.094	0.01	0.119	0.011	1904	39	1890	17	0.2
LYH-1-93	5.61	0.21	0.347	0.0087	0.1095	0.0067	0.1171	0.004	1919	41	1909	60	0.1
LYH-1-94	5.71	0.12	0.3495	0.0043	0.1185	0.004	0.1204	0.0027	1931	21	1956	41	0.1
LYH-1-95	5.73	0.45	0.352	0.011	0.096	0.015	0.112	0.011	1944	52	1880	15	0.7
LYH-1-96	6.48	0.24	0.3732	0.0055	0.1056	0.0059	0.1272	0.0042	2044	26	2064	62	0.1
LYH-1-97	7.63	0.37	0.406	0.01	0.1204	0.007	0.1371	0.0057	2196	48	2199	65	0
LYH-1-98	7.83	0.44	0.408	0.013	0.1241	0.0094	0.1361	0.007	2215	59	2185	90	0
LYH-1-99	7.91	0.16	0.4105	0.0063	0.1249	0.0036	0.1378	0.0026	2219	29	2199	33	0.2
LYH-1-100	9.81	0.2	0.4536	0.0062	0.132	0.0036	0.1567	0.0027	2416	27	2414	30	0
LYH-1-101	10.42	0.69	0.4594	0.0063	0.1372	0.0052	0.1632	0.0099	2436	28	2400	10	0.1
LYH-1-102	10.44	0.35	0.4654	0.0093	0.152	0.018	0.1676	0.0053	2469	42	2531	50	0
LYH-1-103	10.5	0.32	0.4672	0.0076	0.1493	0.0056	0.167	0.0045	2475	34	2526	47	0
LYH-1-104	10.59	0.39	0.47	0.011	0.1343	0.0089	0.1643	0.0045	2483	46	2494	45	0
LYH-1-105	10.55	0.27	0.4706	0.0091	0.142	0.0052	0.1625	0.0042	2484	39	2490	43	0.1
LYH-1-106	10.92	0.31	0.4762	0.0062	0.1492	0.0085	0.1674	0.0056	2510	27	2519	56	0.1
LYH-1-107	11.21	0.56	0.482	0.014	0.129	0.012	0.1658	0.0078	2534	62	2518	78	0.2
LYH-1-108	11.5	1.4	0.4838	0.0078	0.133	0.012	0.176	0.02	2544	34	2580	19	0.2
LYH-1-109	11.41	0.71	0.486	0.013	0.1504	0.0098	0.173	0.011	2552	54	2570	11	0.2
LYH-1-110	11.65	0.93	0.482	0.025	0.151	0.019	0.17	0.01	2570	12	2590	12	0
LYH-1-111	12.37	0.25	0.5047	0.0052	0.1508	0.0031	0.1794	0.0029	2632	22	2644	2.6	0.1
LYH-1-112	13.08	0.7	0.517	0.023	0.149	0.024	0.1828	0.0087	2690	10	2676	8	0.2
LYH-1-113	17.5	1.3	0.581	0.033	0.203	0.021	0.225	0.012	2970	13	2997	8.5	0.2
LYH-2
LYH-2-1	0.163	0.066	0.0243	0.0016	0.0101	0.0026	0.05	0.02	155	10	140	7	2.6
LYH-2-2	0.179	0.038	0.0266	0.0012	0.0086	0.00076	0.052	0.012	169.1	7.6	200	41	2.4
LYH-2-3	0.191	0.024	0.02685	0.00086	0.0071	0.0012	0.0514	0.0068	170.7	5.4	140	23	1.9
LYH-2-4	0.254	0.021	0.03554	0.00072	0.01191	0.00086	0.0536	0.0043	225.1	4.5	280	15	0.8
LYH-2-5	0.26	0.024	0.0373	0.0012	0.012	0.001	0.0488	0.0039	235.8	7.4	130	16	1.2
LYH-2-6	0.267	0.02	0.03783	0.00078	0.01309	0.00077	0.0527	0.0042	239.3	4.8	220	15	1.8
LYH-2-7	0.289	0.029	0.03999	0.00092	0.0138	0.00098	0.0517	0.0052	252.7	5.7	220	18	1.7
LYH-2-8	0.293	0.053	0.0404	0.0013	0.0144	0.0016	0.0497	0.0089	255.4	8	270	35	0.2
LYH-2-9	0.28	0.09	0.0409	0.0043	0.0105	0.0032	0.045	0.015	258	26	180	59	0.8
LYH-2-10	0.304	0.022	0.04161	0.00091	0.0157	0.0012	0.0559	0.0043	262.7	5.6	330	14	1.3
LYH-2-11	0.309	0.043	0.0419	0.0017	0.0124	0.0014	0.0523	0.0072	266	10	360	27	0
LYH-2-12	0.304	0.021	0.0434	0.00071	0.01445	0.00099	0.052	0.0036	273.9	4.4	290	13	1.1
LYH-2-13	0.321	0.024	0.04417	0.00099	0.01467	0.00081	0.0534	0.0041	278.5	6.1	290	15	0.5
LYH-2-14	0.34	0.16	0.0447	0.0034	0.0122	0.0052	0.052	0.024	282	21	90	80	0.7
LYH-2-15	0.34	0.057	0.0453	0.0021	0.0129	0.0018	0.0538	0.0092	285	13	170	28	0.4
LYH-2-16	0.328	0.092	0.0456	0.0028	0.013	0.0016	0.052	0.014	287	17	210	47	0.3
LYH-2-17	0.328	0.021	0.04583	0.00092	0.01546	0.00085	0.0536	0.0035	288.8	5.7	300	13	1.3
LYH-2-18	0.336	0.019	0.04648	0.00071	0.01451	0.00062	0.0535	0.0032	292.8	4.4	340	12	0.3
LYH-2-19	0.357	0.036	0.0471	0.0014	0.0157	0.0015	0.0534	0.0053	296.3	8.6	320	18	0.9
LYH-2-20	0.389	0.023	0.053	0.0011	0.01697	0.00099	0.0542	0.0032	333.1	7	360	12	0.9
LYH-2-21	0.398	0.045	0.0549	0.0035	0.0181	0.0026	0.0527	0.0059	344	22	280	23	1.2
LYH-2-22	0.494	0.036	0.0656	0.0013	0.0212	0.0018	0.057	0.0039	409.3	8.1	400	14	0.6
LYH-2-23	0.515	0.077	0.067	0.0038	0.0265	0.0038	0.0555	0.0063	418	23	410	25	0.5
LYH-2-24	0.524	0.078	0.069	0.0037	0.024	0.019	0.0554	0.0087	430	23	390	33	0.9
LYH-2-25	0.551	0.039	0.0704	0.0013	0.0237	0.0011	0.0564	0.004	438.5	7.6	420	14	0.3
LYH-2-26	0.552	0.036	0.0706	0.0014	0.0237	0.0016	0.0577	0.0039	439.6	8.2	520	15	0.8
LYH-2-27	0.545	0.027	0.0717	0.0014	0.0267	0.0019	0.055	0.0028	446.4	8.5	430	11	0.8
LYH-2-28	0.564	0.064	0.072	0.0029	0.0257	0.0024	0.0584	0.0069	448	18	500	25	0.2
LYH-2-29	0.569	0.063	0.0721	0.0023	0.0249	0.0038	0.0584	0.0063	449	14	440	22	0
LYH-2-30	0.555	0.04	0.0723	0.0018	0.0221	0.0022	0.0535	0.0039	450	11	430	15	0.7
LYH-2-31	0.584	0.041	0.0736	0.0015	0.0232	0.0016	0.0569	0.004	457.7	9.2	410	14	0.2
LYH-2-32	0.58	0.037	0.0746	0.0014	0.0231	0.0012	0.0568	0.0036	463.6	8.5	460	12	0.3
LYH-2-33	0.597	0.04	0.0749	0.0016	0.0239	0.0013	0.0603	0.0043	465.3	9.3	570	14	0.8
LYH-2-34	0.584	0.07	0.075	0.0031	0.0271	0.0031	0.0566	0.0062	466	18	390	22	0.2
LYH-2-35	0.598	0.057	0.0753	0.0023	0.0237	0.0019	0.0596	0.0056	468	14	530	21	0.9
LYH-2-36	0.605	0.09	0.0755	0.0048	0.0253	0.0042	0.0602	0.0084	469	29	630	28	0
LYH-2-37	0.587	0.042	0.0756	0.0014	0.0235	0.0012	0.0572	0.004	469.3	8.4	480	14	0.5
LYH-2-38	0.605	0.037	0.0759	0.0013	0.0268	0.0013	0.0583	0.0036	471.6	7.6	490	12	0.7
LYH-2-39	0.581	0.039	0.0772	0.002	0.0239	0.0023	0.0541	0.0037	479	12	360	15	0.8
LYH-2-40	0.607	0.026	0.0773	0.001	0.0256	0.0011	0.0577	0.0025	480	6.2	486	89	0.6
LYH-2-41	0.58	0.052	0.0777	0.0019	0.0246	0.0016	0.0577	0.0053	482	11	390	17	0.4
LYH-2-42	0.62	0.043	0.0782	0.0016	0.0242	0.0018	0.0585	0.0044	485.6	9.6	540	16	0.7
LYH-2-43	0.618	0.06	0.0785	0.0021	0.0256	0.0018	0.056	0.0055	487	12	420	20	0.2
LYH-2-44	0.627	0.035	0.0792	0.002	0.0244	0.0013	0.0573	0.0033	491	12	450	12	0.2
LYH-2-45	0.646	0.086	0.0801	0.0037	0.0189	0.0033	0.0602	0.0084	497	22	520	28	0.6
LYH-2-46	0.638	0.066	0.08	0.0023	0.0256	0.0022	0.0559	0.006	498	13	370	20	0.4
LYH-2-47	0.66	0.13	0.0812	0.0052	0.0217	0.0066	0.062	0.014	503	31	510	45	0.2
LYH-2-48	0.659	0.038	0.0817	0.0016	0.0255	0.0011	0.0608	0.0036	506.2	9.3	540	12	0.6
LYH-2-49	0.645	0.06	0.0823	0.0032	0.0284	0.0036	0.0601	0.0062	510	19	530	22	0.2
LYH-2-50	0.63	0.1	0.0829	0.0035	0.0239	0.0032	0.0539	0.0087	513	21	330	31	0.2
LYH-2-51	0.667	0.028	0.083	0.0011	0.02701	0.00084	0.0594	0.0023	514.6	6.4	547	82	0.7
LYH-2-52	0.668	0.039	0.0834	0.0016	0.0231	0.002	0.0593	0.0037	515.9	9.6	510	12	0.4
LYH-2-53	0.673	0.063	0.0852	0.0032	0.0249	0.0026	0.0561	0.0052	527	19	460	19	0.8
LYH-2-54	0.711	0.024	0.0876	0.0013	0.0278	0.0013	0.0587	0.0022	542.2	7.8	556	80	0.3
LYH-2-55	0.705	0.026	0.0886	0.0011	0.0283	0.0013	0.0583	0.0021	547.1	6.7	515	79	0.6
LYH-2-56	0.739	0.075	0.0909	0.0072	0.0292	0.0052	0.0589	0.0094	560	42	490	34	0.2
LYH-2-57	0.763	0.058	0.0916	0.0034	0.028	0.0023	0.0627	0.0038	567	20	690	13	0.5
LYH-2-58	0.95	0.18	0.1103	0.0097	0.039	0.019	0.063	0.011	674	56	640	37	0.3
LYH-2-59	1.088	0.079	0.1221	0.0039	0.0387	0.0022	0.0676	0.0042	742	23	840	13	0.3
LYH-2-60	1.27	0.34	0.137	0.011	0.0486	0.0047	0.067	0.015	828	62	870	44	0.2
LYH-2-61	1.382	0.073	0.1456	0.0032	0.051	0.0041	0.0689	0.0032	876	18	900	10	0.3
LYH-2-62	1.46	0.16	0.1518	0.0063	0.034	0.018	0.068	0.0054	911	35	900	21	0.2
LYH-2-63	1.538	0.093	0.156	0.0033	0.051	0.0026	0.0716	0.0043	933	19	870	12	0.3
LYH-2-64	1.59	0.36	0.1574	0.0057	0.0372	0.0067	0.073	0.017	942	32	850	49	0.2
LYH-2-65	1.6	0.1	0.1605	0.003	0.0505	0.0024	0.0735	0.0047	959	17	930	13	0.4
LYH-2-66	1.682	0.072	0.1686	0.0027	0.0653	0.0032	0.0732	0.0029	1004	15	1013	81	0
LYH-2-67	1.74	0.15	0.1714	0.0054	0.0505	0.004	0.0735	0.0063	1025	28	1050	17	0.3
LYH-2-68	1.816	0.082	0.1773	0.0041	0.0536	0.0025	0.075	0.0031	1054	22	1074	85	0.2
LYH-2-69	1.847	0.065	0.1786	0.0019	0.059	0.0021	0.0754	0.0025	1059	10	1059	68	0.2
LYH-2-70	1.89	0.13	0.1816	0.0045	0.0557	0.0063	0.0711	0.0049	1075	25	980	15	0.1
LYH-2-71	1.92	0.13	0.182	0.0045	0.0545	0.0039	0.0772	0.0053	1077	25	1090	14	0.1
LYH-2-72	1.93	0.21	0.1825	0.0062	0.0534	0.0041	0.078	0.0081	1079	33	1090	20	0.2
LYH-2-73	1.88	0.11	0.1826	0.0028	0.0599	0.0028	0.0759	0.0042	1081	15	1050	12	0.4
LYH-2-74	2.25	0.15	0.2036	0.0036	0.0635	0.0023	0.0803	0.0055	1194	20	1200	13	0.1
LYH-2-75	2.33	0.13	0.2071	0.0044	0.0649	0.0058	0.0797	0.0046	1217	24	1160	11	0.3
LYH-2-76	2.85	0.51	0.2376	0.0097	0.081	0.014	0.086	0.012	1374	51	1390	28	0.3
LYH-2-77	3.21	0.34	0.2443	0.0071	0.104	0.034	0.0979	0.0084	1407	37	1420	11	0.3
LYH-2-78	3.37	0.16	0.2605	0.0081	0.071	0.0053	0.0948	0.0054	1491	42	1530	10	0.1
LYH-2-79	3.43	0.13	0.2635	0.0046	0.0698	0.0025	0.0983	0.0032	1509	24	1581	62	0.1
LYH-2-80	3.59	0.21	0.2686	0.0068	0.0702	0.0048	0.0973	0.0055	1537	35	1540	11	0.1
LYH-2-81	3.8	1.2	0.271	0.02	0.105	0.02	0.1	0.028	1550	10	1530	57	0
LYH-2-82	4.36	0.21	0.3015	0.007	0.1013	0.0055	0.107	0.0057	1697	35	1760	10	0.1
LYH-2-83	5.01	0.48	0.324	0.013	0.104	0.031	0.108	0.012	1806	65	1860	19	0.3
LYH-2-84	5.01	0.79	0.324	0.01	0.093	0.021	0.114	0.019	1807	50	1800	30	0.4
LYH-2-85	4.91	0.45	0.325	0.011	0.0886	0.0068	0.114	0.01	1814	55	1820	16	0.1
LYH-2-86	5.12	0.86	0.329	0.032	0.107	0.018	0.116	0.015	1830	15	1880	23	0
LYH-2-87	5.15	0.39	0.329	0.011	0.0999	0.0076	0.1149	0.0096	1833	52	1830	15	0.1
LYH-2-88	5.11	0.26	0.331	0.012	0.0944	0.0086	0.1125	0.0076	1841	59	1820	12	0.1
LYH-2-89	5.19	0.17	0.3324	0.0051	0.1053	0.0039	0.1176	0.0033	1848	24	1923	52	0.1
LYH-2-90	5.06	0.33	0.3328	0.0068	0.092	0.015	0.1103	0.0084	1852	33	1790	14	0.2
LYH-2-91	5.3	0.28	0.3319	0.0062	0.1041	0.0065	0.116	0.0061	1853	30	1822	90	0.2
LYH-2-92	5.35	0.2	0.3417	0.0057	0.1025	0.0035	0.1156	0.004	1893	27	1890	62	0.4
LYH-2-93	5.4	0.53	0.343	0.013	0.12	0.018	0.112	0.012	1898	60	1770	20	1.6
LYH-2-94	5.72	0.17	0.3502	0.0059	0.0965	0.0076	0.1185	0.0035	1935	28	1921	54	0.3
LYH-2-95	6.45	0.57	0.3669	0.0086	0.145	0.017	0.129	0.011	2014	41	2020	15	0
LYH-2-96	8.89	0.96	0.435	0.048	0.136	0.04	0.154	0.025	2320	22	2350	28	0
LYH-2-97	9.4	1.3	0.443	0.019	0.154	0.014	0.155	0.023	2362	86	2360	27	0.1
LYH-2-98	10.25	0.36	0.4656	0.006	0.1342	0.0056	0.158	0.0053	2462	26	2418	56	0.1
LYH-2-99	10.62	0.32	0.4705	0.0072	0.1261	0.004	0.1645	0.0048	2483	32	2497	49	0.1
LYH-2-100	10.61	0.29	0.4699	0.0059	0.136	0.0042	0.1657	0.0042	2485	26	2524	43	0.1
LYH-2-101	11	1.6	0.474	0.027	0.149	0.016	0.17	0.02	2500	12	2490	21	0.4
LYH-2-102	11.6	2.1	0.499	0.028	0.163	0.038	0.174	0.019	2610	12	2570	18	0.4
LYH-2-103	15.7	1.2	0.563	0.03	0.177	0.025	0.207	0.023	2880	12	2910	15	0.1
LYH-2-104	21.34	0.57	0.6297	0.0076	0.1659	0.0043	0.2443	0.0057	3146	30	3148	17	0
LYH-3
LYH-3-1	0.19	0.052	0.0258	0.0016	0.0077	0.001	0.053	0.014	164	10	160	45	2.4
LYH-3-2	0.217	0.016	0.03124	0.00064	0.0111	0.0018	0.0506	0.0038	198.2	4	170	14	0.6
LYH-3-3	0.235	0.037	0.0325	0.0016	0.0113	0.0012	0.059	0.01	205.8	9.9	310	30	1.6
LYH-3-4	0.236	0.014	0.0333	0.00054	0.01074	0.00053	0.0512	0.003	211.2	3.3	230	11	1.8
LYH-3-5	0.245	0.061	0.0342	0.0024	0.0102	0.0023	0.053	0.013	217	15	410	48	0.5
LYH-3-6	0.257	0.015	0.03561	0.00056	0.01137	0.00057	0.0537	0.0031	225.5	3.5	260	10	1.6
LYH-3-7	0.308	0.057	0.0357	0.002	0.013	0.0021	0.063	0.012	226	12	20	29	0.4
LYH-3-8	0.255	0.031	0.036	0.0012	0.011	0.0012	0.0525	0.0066	228.2	7.5	290	23	1.7
LYH-3-9	0.273	0.078	0.0362	0.0032	0.0123	0.0027	0.057	0.019	229	20	120	51	0.4
LYH-3-10	0.262	0.016	0.03665	0.00073	0.01142	0.00057	0.0525	0.0034	232	4.5	280	10	1.3
LYH-3-11	0.258	0.015	0.03674	0.00076	0.01191	0.00055	0.0511	0.0031	232.5	4.7	210	11	0.2
LYH-3-12	0.258	0.046	0.038	0.0022	0.0105	0.0016	0.0489	0.009	240	14	180	29	0.8
LYH-3-13	0.299	0.029	0.0401	0.0011	0.01274	0.00088	0.0555	0.0057	253.6	6.7	240	18	0.9
LYH-3-14	0.31	0.1	0.043	0.0032	0.0174	0.0036	0.049	0.015	271	20	80	52	0.4
LYH-3-15	0.333	0.044	0.0448	0.0017	0.0143	0.0015	0.0544	0.0071	283	10	320	26	1.1
LYH-3-16	0.352	0.04	0.0477	0.0014	0.016	0.0018	0.0531	0.0068	300.4	8.6	330	24	0.5
LYH-3-17	0.396	0.039	0.0545	0.0015	0.0191	0.0013	0.0529	0.0054	342	9.1	350	18	0.6
LYH-3-18	0.484	0.072	0.0628	0.0032	0.0202	0.002	0.0561	0.0077	393	19	580	28	0.5
LYH-3-19	0.527	0.055	0.0655	0.002	0.0201	0.0013	0.0594	0.0062	409	12	430	20	0.2
LYH-3-20	0.515	0.09	0.0657	0.0026	0.0157	0.0027	0.059	0.011	410	15	420	38	0.5
LYH-3-21	0.5	0.048	0.0662	0.0017	0.0207	0.0014	0.0552	0.0054	413	10	410	18	0.5
LYH-3-22	0.527	0.034	0.0678	0.0014	0.0217	0.0011	0.057	0.0036	422.6	8.2	470	13	0.3
LYH-3-23	0.52	0.021	0.06816	0.00074	0.02109	0.0008	0.0566	0.0022	425	4.5	440	79	0.5
LYH-3-24	0.534	0.029	0.0688	0.0013	0.0227	0.0013	0.0567	0.003	429.4	8	410	10	0.6
LYH-3-25	0.56	0.1	0.0696	0.0037	0.0258	0.0034	0.061	0.011	438	21	560	35	0
LYH-3-26	0.556	0.084	0.071	0.0025	0.0214	0.0026	0.058	0.01	442	15	500	35	0
LYH-3-27	0.572	0.084	0.0711	0.0029	0.0243	0.002	0.0579	0.0079	443	17	440	27	0
LYH-3-28	0.565	0.07	0.0712	0.0026	0.023	0.0017	0.0571	0.0071	444	15	480	26	0.7
LYH-3-29	0.555	0.059	0.072	0.0023	0.0226	0.002	0.0567	0.0059	448	14	450	20	0.4
LYH-3-30	0.576	0.091	0.0722	0.0026	0.0232	0.0031	0.0595	0.0098	449	15	360	30	0
LYH-3-31	0.598	0.076	0.0724	0.0023	0.0243	0.0022	0.0593	0.0076	450	14	410	23	0.9
LYH-3-32	0.543	0.059	0.0727	0.0022	0.0222	0.0017	0.0572	0.0062	452	13	430	21	0.9
LYH-3-33	0.589	0.098	0.0726	0.0036	0.0228	0.0026	0.059	0.01	452	22	410	32	0
LYH-3-34	0.58	0.15	0.0734	0.0052	0.0246	0.0056	0.064	0.018	456	31	520	52	0.9
LYH-3-35	0.61	0.15	0.0734	0.0038	0.025	0.0038	0.054	0.013	456	23	260	40	0
LYH-3-36	0.569	0.072	0.0734	0.0024	0.0241	0.0019	0.0575	0.0081	457	14	480	28	0.9
LYH-3-37	0.585	0.041	0.0738	0.0015	0.0235	0.0014	0.0572	0.004	458.8	8.9	430	14	0.3
LYH-3-38	0.571	0.063	0.0735	0.0031	0.0241	0.0028	0.0596	0.0079	459	18	410	24	0
LYH-3-39	0.578	0.048	0.0739	0.0016	0.023	0.0013	0.0553	0.0045	459.2	9.8	390	16	0.7
LYH-3-40	0.567	0.023	0.0739	0.0013	0.0234	0.0013	0.0562	0.0023	459.5	8	454	91	0.8
LYH-3-41	0.572	0.049	0.0743	0.0017	0.0233	0.0016	0.0573	0.0052	461	10	380	17	0.7
LYH-3-42	0.59	0.1	0.0744	0.0036	0.0214	0.0032	0.06	0.011	462	21	470	35	0.2
LYH-3-43	0.596	0.08	0.0744	0.0024	0.0243	0.0024	0.0573	0.0071	462	14	500	25	0.6
LYH-3-44	0.588	0.038	0.0745	0.0015	0.0224	0.001	0.0585	0.0037	462.8	8.9	480	13	0.4
LYH-3-45	0.592	0.09	0.0745	0.0029	0.0249	0.0026	0.055	0.0087	463	18	360	29	0.4
LYH-3-46	0.59	0.11	0.0749	0.0043	0.0258	0.003	0.0546	0.009	465	26	300	32	0.2
LYH-3-47	0.592	0.029	0.0751	0.0011	0.0233	0.0013	0.057	0.0029	466.4	6.9	470	11	0.3
LYH-3-48	0.599	0.039	0.0753	0.0017	0.0232	0.001	0.0596	0.004	469	10	500	13	0.6
LYH-3-49	0.577	0.047	0.0755	0.0019	0.0248	0.0027	0.0563	0.0044	469	11	430	16	0.6
LYH-3-50	0.631	0.07	0.0759	0.0026	0.0244	0.0021	0.061	0.0069	471	16	460	21	0.2
LYH-3-51	0.597	0.054	0.0763	0.002	0.024	0.0016	0.0584	0.0055	474	12	420	17	0.6
LYH-3-52	0.608	0.042	0.0768	0.002	0.0234	0.0012	0.0565	0.0036	477	12	470	13	0.4
LYH-3-53	0.605	0.045	0.0775	0.0018	0.0253	0.0018	0.0562	0.0042	481	11	410	14	0.2
LYH-3-54	0.627	0.029	0.0795	0.0011	0.0257	0.0012	0.0575	0.0026	492.7	6.4	471	9	0.3
LYH-3-55	0.677	0.046	0.0848	0.0018	0.0274	0.0017	0.0594	0.0042	525	11	460	14	0.6
LYH-3-56	0.93	0.11	0.1044	0.0061	0.036	0.0033	0.0629	0.0051	647	37	660	17	0.6
LYH-3-57	0.99	0.11	0.1128	0.0041	0.0359	0.0043	0.0657	0.0084	689	24	670	25	0.6
LYH-3-58	1.144	0.097	0.1237	0.0034	0.0412	0.0026	0.0681	0.0053	753	19	760	16	0.1
LYH-3-59	1.22	0.17	0.1355	0.0047	0.0457	0.0039	0.0686	0.0099	819	27	700	30	0.1
LYH-3-60	1.291	0.076	0.1373	0.0023	0.0481	0.0047	0.0684	0.0037	829	13	770	11	0.1
LYH-3-61	1.75	0.42	0.156	0.011	0.067	0.014	0.078	0.018	929	61	870	47	0.1
LYH-3-62	1.51	0.07	0.1562	0.0021	0.0505	0.003	0.0699	0.0033	935	12	891	96	0.1
LYH-3-63	1.545	0.08	0.1567	0.0025	0.0486	0.0021	0.0712	0.0037	938	14	890	11	0.3
LYH-3-64	1.58	0.19	0.1593	0.0063	0.0537	0.006	0.0708	0.0089	953	35	840	26	0.7
LYH-3-65	1.65	0.13	0.1611	0.0034	0.05	0.0029	0.0731	0.0054	964	18	930	15	0.1
LYH-3-66	1.68	0.17	0.1684	0.0057	0.0508	0.007	0.073	0.0073	1003	31	980	19	0
LYH-3-67	1.83	0.14	0.1697	0.0035	0.0526	0.0043	0.076	0.0052	1013	19	1010	12	0.5
LYH-3-68	1.75	0.11	0.1714	0.0024	0.0553	0.0027	0.0734	0.0042	1020	13	960	12	0.2
LYH-3-69	1.95	0.16	0.1812	0.005	0.0652	0.0043	0.0763	0.0051	1074	28	1010	14	0.1
LYH-3-70	1.99	0.32	0.185	0.01	0.0614	0.0068	0.08	0.014	1091	56	1030	37	0.1
LYH-3-71	2.13	0.61	0.191	0.016	0.0718	0.006	0.084	0.024	1129	86	1140	73	0.1
LYH-3-72	2.18	0.46	0.198	0.015	0.073	0.026	0.078	0.014	1162	83	1080	46	0.2
LYH-3-73	2.16	0.15	0.1975	0.005	0.0608	0.0049	0.0808	0.006	1165	26	1180	15	0.3
LYH-3-74	3.06	0.16	0.2462	0.0052	0.0718	0.005	0.0904	0.0044	1418	27	1452	93	0
LYH-3-75	3.57	0.29	0.269	0.015	0.094	0.012	0.0996	0.0063	1532	75	1600	12	0.2
LYH-3-76	3.82	0.47	0.279	0.014	0.0848	0.0097	0.1	0.013	1583	71	1620	27	0.2
LYH-3-77	3.91	0.21	0.2847	0.0042	0.0848	0.0052	0.0983	0.005	1614	21	1571	98	0.1
LYH-3-78	4.38	0.3	0.2996	0.0079	0.0949	0.0048	0.1053	0.0067	1693	39	1640	12	0.2
LYH-3-79	4.42	0.33	0.3012	0.009	0.0921	0.009	0.1076	0.0086	1699	44	1640	16	0.1
LYH-3-80	4.1	0.71	0.3	0.018	0.096	0.015	0.106	0.021	1709	82	1790	31	0.1
LYH-3-81	4.55	0.3	0.3054	0.0071	0.0918	0.0065	0.1065	0.0072	1717	35	1700	13	0.1
LYH-3-82	4.67	0.31	0.3083	0.0088	0.1009	0.0046	0.1115	0.0072	1736	44	1780	12	0.1
LYH-3-83	4.62	0.23	0.313	0.0062	0.0906	0.0078	0.108	0.0056	1755	30	1727	97	0.1
LYH-3-84	4.63	0.38	0.314	0.013	0.091	0.01	0.1088	0.009	1770	59	1780	16	0.1
LYH-3-85	4.57	0.73	0.311	0.032	0.079	0.026	0.106	0.018	1780	17	1660	29	0.6
LYH-3-86	4.74	0.3	0.3186	0.0088	0.0911	0.0071	0.1097	0.0068	1782	43	1830	12	0
LYH-3-87	4.66	0.67	0.319	0.013	0.113	0.014	0.11	0.016	1783	65	1800	25	0.2
LYH-3-88	4.98	0.4	0.3221	0.0087	0.0956	0.009	0.1103	0.0089	1798	42	1780	15	0.1
LYH-3-89	4.98	0.42	0.322	0.0083	0.0913	0.0067	0.1111	0.0089	1799	40	1780	15	0.2
LYH-3-90	4.99	0.26	0.3226	0.0073	0.0948	0.0057	0.1122	0.0062	1802	35	1800	11	0.1
LYH-3-91	5	0.51	0.324	0.02	0.098	0.016	0.103	0.012	1804	99	1800	22	0.1
LYH-3-92	4.97	0.11	0.3249	0.0032	0.0992	0.0028	0.113	0.0027	1813	15	1846	42	0.2
LYH-3-93	5.11	0.13	0.3285	0.0039	0.0904	0.0038	0.1141	0.0025	1831	19	1873	43	0.2
LYH-3-94	5.2	0.19	0.3319	0.0051	0.1083	0.0055	0.1137	0.0042	1845	25	1841	68	0.3
LYH-3-95	5.66	0.87	0.335	0.016	0.116	0.02	0.117	0.018	1882	73	1870	29	0.1
LYH-3-96	5.51	0.11	0.3415	0.0031	0.1025	0.0037	0.1188	0.0023	1896	15	1929	34	0.2
LYH-3-97	6	1.3	0.345	0.028	0.114	0.02	0.125	0.022	1910	13	2030	33	0
LYH-3-98	5.94	0.65	0.347	0.011	0.1036	0.0086	0.121	0.012	1915	53	1870	18	0.1
LYH-3-99	5.92	0.95	0.347	0.012	0.103	0.014	0.117	0.018	1917	58	1910	29	0.4
LYH-3-100	5.79	0.32	0.3512	0.006	0.1112	0.0072	0.12	0.006	1943	28	1954	83	0.1
LYH-3-101	6.33	0.52	0.37	0.011	0.1014	0.009	0.1211	0.0084	2030	53	2010	13	0.1
LYH-3-102	6.64	0.46	0.3726	0.0085	0.115	0.0055	0.1286	0.0093	2044	41	2030	13	0
LYH-3-103	7	1.4	0.377	0.014	0.114	0.017	0.132	0.026	2061	67	1990	36	0
LYH-3-104	6.8	1	0.379	0.014	0.115	0.014	0.132	0.019	2068	65	2060	24	0.4
LYH-3-105	6.87	0.69	0.386	0.017	0.117	0.017	0.135	0.015	2102	79	2160	19	0.1
LYH-3-106	9.3	1.3	0.429	0.024	0.129	0.018	0.163	0.024	2310	10	2360	26	0
LYH-3-107	10.21	0.45	0.458	0.0089	0.1308	0.0051	0.1612	0.0065	2434	36	2430	70	0.1
LYH-3-108	11	1.7	0.47	0.024	0.132	0.02	0.164	0.023	2480	11	2420	24	0
LYH-3-109	11	2	0.47	0.027	0.14	0.015	0.165	0.025	2480	12	2430	25	0
LYH-3-110	11.15	0.62	0.4771	0.0093	0.1544	0.0073	0.1708	0.0096	2517	40	2499	97	0
LYH-3-111	14.5	1.2	0.5359	0.0096	0.1508	0.0091	0.192	0.015	2765	40	2720	13	0
LYH-3-112	16.1	1.7	0.55	0.025	0.166	0.011	0.218	0.022	2857	77	2860	18	0.1
LYH-4
LYH-4-1	0.1537	0.0058	0.02246	0.00023	0.00676	0.0002	0.0496	0.0018	143.2	1.5	165	7	1.7
LYH-4-2	0.165	0.0057	0.0237	0.0003	0.00757	0.00025	0.0508	0.0018	151	1.9	225	7	2.5
LYH-4-3	0.183	0.035	0.0251	0.0012	0.0083	0.001	0.054	0.011	159.9	7.9	100	32	1.8
LYH-4-4	0.21	0.012	0.02994	0.00033	0.01031	0.00044	0.0509	0.0028	190.1	2.1	230	11	2
LYH-4-5	0.214	0.023	0.03102	0.00095	0.0106	0.00051	0.0503	0.0057	196.9	6	140	20	1.5
LYH-4-6	0.222	0.013	0.03148	0.0005	0.01038	0.00041	0.0514	0.0031	199.8	3.1	230	11	1.1
LYH-4-7	0.217	0.012	0.03166	0.00054	0.01108	0.00081	0.0489	0.0029	200.9	3.4	180	11	1.4
LYH-4-8	0.2219	0.0063	0.03177	0.0004	0.00915	0.00025	0.0509	0.0015	201.6	2.5	232	63	1.2
LYH-4-9	0.225	0.031	0.0319	0.0025	0.00876	0.00099	0.0517	0.0049	202	16	270	21	2
LYH-4-10	0.225	0.021	0.03261	0.00065	0.0104	0.0006	0.0501	0.0045	206.8	4.1	170	17	0.1
LYH-4-11	0.228	0.01	0.03268	0.00047	0.01073	0.00054	0.0512	0.0023	207.3	2.9	243	9	0.8
LYH-4-12	0.2306	0.0076	0.03277	0.00031	0.01077	0.0003	0.0514	0.0017	208	1.9	240	65	1.2
LYH-4-13	0.2344	0.0094	0.03314	0.00052	0.01133	0.00037	0.0509	0.002	210.1	3.2	234	82	1.8
LYH-4-14	0.2354	0.009	0.03379	0.00047	0.01117	0.0003	0.0505	0.0019	214.2	3	202	76	0.6
LYH-4-15	0.241	0.014	0.03379	0.00052	0.01101	0.00043	0.0521	0.0029	214.2	3.2	250	11	1.3
LYH-4-16	0.24	0.0065	0.03404	0.00035	0.01128	0.00031	0.0517	0.0016	215.8	2.2	282	65	1
LYH-4-17	0.2434	0.0097	0.03484	0.00041	0.01151	0.00033	0.0505	0.002	220.8	2.5	206	76	0.2
LYH-4-18	0.2509	0.0091	0.0354	0.0004	0.01198	0.0003	0.0525	0.0019	224.2	2.5	287	76	1.2
LYH-4-19	0.281	0.018	0.03971	0.00072	0.01348	0.00069	0.0513	0.0031	251	4.5	240	12	0.4
LYH-4-20	0.288	0.011	0.04039	0.00052	0.01328	0.00047	0.0527	0.002	255.2	3.2	299	78	1.1
LYH-4-21	0.315	0.018	0.04365	0.00063	0.01501	0.00054	0.0524	0.003	275.4	3.9	280	12	0.9
LYH-4-22	0.324	0.021	0.044	0.0011	0.01466	0.00066	0.0537	0.0036	277.2	6.6	230	12	0.1
LYH-4-23	0.31	0.025	0.0445	0.0011	0.01328	0.00066	0.0507	0.0041	280.5	6.8	280	15	0.9
LYH-4-24	0.326	0.015	0.04564	0.0007	0.01542	0.00074	0.0513	0.0024	287.7	4.3	248	95	0.9
LYH-4-25	0.333	0.032	0.0462	0.0013	0.0159	0.0011	0.0553	0.0057	291	7.9	310	19	0.3
LYH-4-26	0.412	0.068	0.0556	0.0019	0.0153	0.0025	0.0533	0.0081	349	11	320	32	0.3
LYH-4-27	0.454	0.02	0.0603	0.001	0.01771	0.00055	0.0559	0.0025	377.4	6.3	411	95	1
LYH-4-28	0.461	0.024	0.0618	0.001	0.02083	0.00067	0.0558	0.0029	386.8	6.1	410	11	0.3
LYH-4-29	0.468	0.018	0.0626	0.001	0.02404	0.00097	0.0557	0.002	391.4	6.1	418	76	0.6
LYH-4-30	0.49	0.021	0.06401	0.00085	0.01934	0.00065	0.0569	0.0026	399.9	5.1	450	95	0.5
LYH-4-31	0.49	0.017	0.06426	0.00073	0.0197	0.00051	0.0554	0.0019	401.4	4.5	414	74	0.6
LYH-4-32	0.494	0.036	0.065	0.0015	0.0212	0.0021	0.0564	0.0043	406	9	400	15	0
LYH-4-33	0.501	0.013	0.06559	0.00078	0.01933	0.00044	0.0556	0.0014	409.5	4.7	420	53	0.6
LYH-4-34	0.511	0.037	0.0662	0.0012	0.02132	0.00094	0.0564	0.004	413.4	7.5	410	15	0.6
LYH-4-35	0.503	0.013	0.06691	0.0007	0.02024	0.00047	0.0546	0.0014	417.4	4.2	386	54	0.7
LYH-4-36	0.5	0.021	0.0669	0.0012	0.02089	0.00076	0.0545	0.0024	417.5	7.2	364	93	1.1
LYH-4-37	0.508	0.012	0.06723	0.00065	0.01805	0.00073	0.0546	0.0012	419.4	3.9	396	47	0.5
LYH-4-38	0.518	0.036	0.068	0.0019	0.0235	0.0013	0.0597	0.0044	424	12	570	16	0.7
LYH-4-39	0.523	0.028	0.0683	0.0017	0.01774	0.0009	0.0547	0.0028	426	11	400	12	0
LYH-4-40	0.522	0.02	0.06864	0.00081	0.045	0.011	0.0553	0.0023	427.9	4.9	390	89	0.3
LYH-4-41	0.531	0.019	0.06884	0.00098	0.02114	0.00064	0.0559	0.0019	429.1	5.9	427	76	0.4
LYH-4-42	0.536	0.023	0.0692	0.0011	0.0215	0.00079	0.0564	0.0024	431.4	6.9	446	89	0.8
LYH-4-43	0.54	0.023	0.06964	0.00083	0.02237	0.00065	0.0562	0.0025	433.9	5	431	88	0.3
LYH-4-44	0.542	0.021	0.06992	0.00089	0.02095	0.00066	0.0564	0.002	435.6	5.4	423	75	0.1
LYH-4-45	0.537	0.015	0.07022	0.00068	0.02299	0.00042	0.0553	0.0015	437.4	4.1	408	57	0.4
LYH-4-46	0.547	0.038	0.0703	0.0018	0.0208	0.0012	0.0557	0.004	438	11	420	15	0.2
LYH-4-47	0.542	0.026	0.0704	0.0011	0.0231	0.001	0.0557	0.0026	438.2	6.8	430	10	0.3
LYH-4-48	0.546	0.021	0.0704	0.0011	0.02234	0.00069	0.0574	0.0023	438.4	6.8	514	91	0.8
LYH-4-49	0.547	0.017	0.07067	0.00085	0.02358	0.0006	0.0562	0.0018	440.1	5.1	428	68	0.4
LYH-4-50	0.547	0.024	0.07068	0.00099	0.02373	0.00076	0.0557	0.0024	440.2	5.9	403	88	0.2
LYH-4-51	0.548	0.02	0.0708	0.0011	0.02269	0.00077	0.0553	0.002	441	6.5	402	77	0.7
LYH-4-52	0.556	0.027	0.0711	0.001	0.02268	0.00083	0.0576	0.003	442.6	6.1	480	11	0.3
LYH-4-53	0.558	0.037	0.0711	0.0013	0.02102	0.00084	0.056	0.0038	442.8	7.9	420	14	0.5
LYH-4-54	0.54	0.029	0.0715	0.0012	0.02455	0.00096	0.0551	0.003	445	7.2	390	11	0.2
LYH-4-55	0.553	0.018	0.0715	0.0011	0.02506	0.00098	0.0559	0.0018	445.1	6.5	421	70	0.2
LYH-4-56	0.557	0.021	0.07157	0.00082	0.0217	0.00053	0.0561	0.0019	445.6	4.9	428	75	0.3
LYH-4-57	0.557	0.018	0.07184	0.0008	0.02399	0.00058	0.0558	0.0018	447.2	4.8	440	69	0.6
LYH-4-58	0.558	0.016	0.07186	0.00087	0.02479	0.00066	0.0565	0.0016	447.3	5.3	475	62	0.8
LYH-4-59	0.565	0.036	0.0722	0.0018	0.02242	0.00099	0.0564	0.0036	449	11	410	13	0.7
LYH-4-60	0.552	0.039	0.0725	0.002	0.0229	0.0016	0.055	0.0043	451	12	380	15	0
LYH-4-61	0.549	0.054	0.0728	0.0028	0.0216	0.0013	0.0559	0.0054	453	17	420	21	0
LYH-4-62	0.565	0.034	0.0729	0.0016	0.0234	0.001	0.0565	0.0032	453.6	9.9	410	12	0.8
LYH-4-63	0.573	0.019	0.0732	0.0011	0.02269	0.0006	0.0578	0.0019	455.1	6.5	490	73	0.9
LYH-4-64	0.583	0.055	0.0735	0.0023	0.0218	0.0021	0.0568	0.0053	457	14	390	19	0
LYH-4-65	0.566	0.023	0.0736	0.0011	0.02225	0.00071	0.0563	0.0024	457.9	6.8	430	86	0.4
LYH-4-66	0.572	0.031	0.0737	0.0012	0.0227	0.0013	0.0561	0.0031	458.9	7.3	410	11	0.6
LYH-4-67	0.576	0.016	0.07382	0.00084	0.02381	0.00077	0.0578	0.0016	459	5	495	60	0.7
LYH-4-68	0.582	0.031	0.0746	0.0012	0.0244	0.0012	0.0556	0.0029	463.9	7.1	410	11	0.4
LYH-4-69	0.588	0.031	0.0748	0.0013	0.02361	0.00091	0.0577	0.0028	465.1	7.9	470	10	0.4
LYH-4-70	0.597	0.029	0.0763	0.0012	0.02551	0.00094	0.0585	0.0029	474	7.5	510	10	0.2
LYH-4-71	0.602	0.022	0.07695	0.00092	0.02088	0.00063	0.0566	0.0019	477.8	5.5	459	72	0.4
LYH-4-72	0.631	0.025	0.08	0.001	0.0253	0.0012	0.0574	0.0023	495.9	5.9	497	85	0.2
LYH-4-73	0.638	0.038	0.0801	0.003	0.0393	0.0049	0.0577	0.0049	496	18	560	22	0.8
LYH-4-74	0.79	0.04	0.0957	0.0016	0.0409	0.0019	0.0595	0.003	589	9.2	562	98	0.3
LYH-4-75	1.094	0.041	0.1241	0.0018	0.0399	0.0011	0.0631	0.0023	754	10	696	81	0.3
LYH-4-76	1.124	0.089	0.1269	0.003	0.0414	0.0044	0.0669	0.0053	770	17	800	18	0.5
LYH-4-77	1.219	0.029	0.1334	0.0015	0.0452	0.0012	0.0664	0.0015	806.7	8.3	825	45	0
LYH-4-78	1.326	0.098	0.141	0.0047	0.0448	0.005	0.0678	0.0055	850	27	790	17	0
LYH-4-79	1.35	0.04	0.1432	0.0014	0.047	0.0023	0.0676	0.0021	863.3	7.8	847	64	0.3
LYH-4-80	1.349	0.028	0.1441	0.0017	0.0468	0.0012	0.0676	0.0012	868.3	9.6	853	38	0.1
LYH-4-81	1.408	0.047	0.1478	0.0019	0.0479	0.0015	0.0694	0.0023	889	11	864	73	0.2
LYH-4-82	1.464	0.066	0.152	0.0023	0.0451	0.0017	0.0703	0.0031	912	13	921	86	0.2
LYH-4-83	1.5	0.12	0.154	0.004	0.0558	0.0046	0.0694	0.0074	923	22	910	20	0.4
LYH-4-84	1.555	0.032	0.1589	0.0017	0.0514	0.0013	0.0708	0.0016	951	9.3	951	45	0
LYH-4-85	1.61	0.11	0.1628	0.0039	0.0541	0.0031	0.0725	0.0049	972	22	1040	13	0
LYH-4-86	1.656	0.059	0.1666	0.0021	0.0541	0.0015	0.072	0.0026	993	12	970	73	0.1
LYH-4-87	1.723	0.07	0.1709	0.0024	0.0506	0.0018	0.0724	0.0028	1017	13	991	80	0
LYH-4-88	1.79	0.14	0.1741	0.0071	0.0469	0.0026	0.0745	0.0036	1034	39	1040	98	0.2
LYH-4-89	2.23	0.049	0.2016	0.0022	0.0597	0.0022	0.08	0.0017	1184	12	1211	41	0.3
LYH-4-90	2.227	0.08	0.2034	0.0042	0.0544	0.0025	0.0802	0.0029	1193	22	1182	73	0.2
LYH-4-91	2.51	0.13	0.2175	0.0049	0.0665	0.0093	0.0841	0.0044	1268	26	1320	10	0.2
LYH-4-92	2.65	0.16	0.226	0.0056	0.0768	0.0097	0.0862	0.005	1313	29	1330	11	0.1
LYH-4-93	2.814	0.051	0.2341	0.0022	0.0688	0.0015	0.0874	0.0016	1357	12	1376	36	0.1
LYH-4-94	3.47	0.86	0.262	0.024	0.075	0.011	0.095	0.019	1500	12	1470	40	0
LYH-4-95	3.52	0.12	0.2678	0.0094	0.0792	0.0058	0.0974	0.0054	1529	48	1570	10	0.1
LYH-4-96	3.7	0.12	0.2759	0.0086	0.0742	0.0035	0.1019	0.0049	1570	43	1651	87	0.1
LYH-4-97	4.51	0.41	0.305	0.011	0.0875	0.0089	0.108	0.011	1715	53	1700	18	0.1
LYH-4-98	4.53	0.57	0.308	0.022	0.09	0.016	0.102	0.014	1730	110	1720	31	0
LYH-4-99	4.627	0.097	0.3121	0.0037	0.099	0.0025	0.1094	0.0025	1750	18	1784	43	0.2
LYH-4-100	4.86	0.17	0.3195	0.0056	0.1003	0.0044	0.1112	0.0042	1786	27	1852	63	0.1
LYH-4-101	4.94	0.2	0.3224	0.0056	0.0972	0.0027	0.1145	0.0051	1801	27	1842	83	0
LYH-4-102	5.12	0.12	0.329	0.0038	0.1015	0.0024	0.1134	0.0025	1832	18	1842	39	0.2
LYH-4-103	5.55	0.15	0.3448	0.0068	0.1048	0.0048	0.1171	0.0032	1912	32	1905	51	0.1
LYH-4-104	5.74	0.46	0.3495	0.0093	0.0948	0.0073	0.1165	0.0068	1932	44	1890	11	0.1
LYH-4-105	5.8	0.52	0.352	0.017	0.0607	0.0037	0.1193	0.0069	1941	79	1940	10	0.1
LYH-4-106	5.73	0.13	0.3516	0.0053	0.1069	0.0041	0.118	0.0025	1943	25	1925	39	0.1
LYH-4-107	7.3	0.11	0.3964	0.0043	0.118	0.0026	0.1328	0.0019	2152	20	2133	25	0.2
LYH-4-108	8.4	0.29	0.423	0.007	0.1474	0.0042	0.1419	0.0044	2278	32	2252	53	0.2
LYH-4-109	10.31	0.77	0.464	0.019	0.1134	0.0082	0.1576	0.007	2457	81	2426	74	0
LYH-4-110	10.8	0.14	0.476	0.004	0.1417	0.0022	0.1681	0.002	2509	17	2536	20	0.1
LYH-4-111	10.78	0.17	0.4785	0.005	0.1364	0.0026	0.1647	0.0022	2519	22	2506	22	0.1
LYH-4-112	0.201	0.015	0.02845	0.00061	0.0096	0.00043	0.0514	0.004	180.8	3.8	230	14	0.7
LYH-4-113	0.21	0.021	0.02999	0.00078	0.0115	0.00092	0.0499	0.0049	190.4	4.9	200	18	1.4
LYH-4-114	0.219	0.024	0.03	0.0012	0.0098	0.0011	0.05	0.0048	190.4	7.8	170	17	1.9
LYH-4-115	0.212	0.018	0.03091	0.00087	0.01036	0.00048	0.0495	0.0043	196.2	5.5	150	16	0.6
LYH-4-116	0.215	0.01	0.03091	0.00044	0.01035	0.00038	0.0506	0.0024	196.2	2.8	211	91	0.1
LYH-4-117	0.2154	0.009	0.03125	0.00058	0.01035	0.00038	0.0497	0.002	198.3	3.6	191	77	0.1
LYH-4-118	0.2259	0.0075	0.03219	0.00043	0.01112	0.0003	0.0504	0.0018	204.2	2.7	217	72	1.1
LYH-4-119	0.2275	0.0091	0.03223	0.00043	0.01061	0.00029	0.0504	0.0021	204.4	2.7	222	82	1.2
LYH-4-120	0.238	0.019	0.03304	0.00074	0.01039	0.00055	0.051	0.0039	209.5	4.6	160	13	0.7
LYH-4-121	0.2333	0.0099	0.03304	0.00055	0.01063	0.00044	0.0516	0.0023	209.5	3.4	257	83	1.8
LYH-4-122	0.236	0.012	0.03309	0.00059	0.0107	0.0005	0.0513	0.0026	209.8	3.7	230	10	1.9
LYH-4-123	0.245	0.037	0.0332	0.0013	0.0143	0.0017	0.0529	0.0083	210.4	8.1	110	26	1.1
LYH-4-124	0.238	0.015	0.0336	0.00063	0.01124	0.00047	0.0516	0.0032	213	3.9	230	12	1.4
LYH-4-125	0.2309	0.009	0.03376	0.00047	0.01129	0.00059	0.0501	0.002	214	2.9	195	81	1.8
LYH-4-126	0.239	0.011	0.0341	0.00055	0.01131	0.00051	0.0496	0.0022	216.1	3.4	215	87	0.7
LYH-4-127	0.235	0.013	0.03426	0.00059	0.01135	0.00043	0.0491	0.0028	217.2	3.7	170	11	1
LYH-4-128	0.245	0.01	0.03437	0.0004	0.01176	0.00038	0.0516	0.0022	217.9	2.5	245	85	1.7
LYH-4-129	0.2445	0.0073	0.03449	0.00043	0.01147	0.00031	0.0514	0.0016	218.6	2.7	241	62	1.5
LYH-4-130	0.237	0.013	0.03463	0.00061	0.01188	0.00054	0.0493	0.0027	219.4	3.8	170	10	1.5
LYH-4-131	0.25	0.014	0.03485	0.00068	0.01181	0.00049	0.0527	0.003	220.7	4.2	240	10	1
LYH-4-132	0.249	0.015	0.03535	0.00067	0.01171	0.00056	0.0507	0.0032	223.9	4.1	270	13	1.4
LYH-4-133	0.247	0.01	0.03552	0.0006	0.01169	0.00038	0.0502	0.0021	224.9	3.7	204	83	1
LYH-4-134	0.2487	0.0073	0.03566	0.00049	0.01197	0.0003	0.0506	0.0014	225.8	3	218	55	0.4
LYH-4-135	0.2627	0.009	0.0367	0.00051	0.01366	0.00039	0.0516	0.0018	232.3	3.2	271	73	1.5
LYH-4-136	0.274	0.031	0.0374	0.0012	0.01127	0.00099	0.0525	0.0057	236.5	7.5	150	19	0.2
LYH-4-137	0.258	0.053	0.0378	0.0018	0.0139	0.0014	0.052	0.01	239	11	130	33	0.8
LYH-4-138	0.286	0.018	0.04016	0.0007	0.01329	0.00073	0.0517	0.0032	253.8	4.3	240	13	0.1
LYH-4-139	0.327	0.021	0.04447	0.0008	0.0148	0.00073	0.0546	0.0037	280.9	4.9	290	13	0.7
LYH-4-140	0.378	0.038	0.0488	0.0012	0.0172	0.0011	0.055	0.0051	307.3	7.3	190	15	1.1
LYH-4-141	0.359	0.013	0.04885	0.00072	0.01628	0.00042	0.0531	0.002	307.8	4.4	321	75	0.9
LYH-4-142	0.39	0.03	0.0523	0.0013	0.01801	0.00099	0.0542	0.0043	328.4	7.9	340	15	0.5
LYH-4-143	0.437	0.017	0.0584	0.001	0.01954	0.0007	0.055	0.002	365.8	6.3	390	79	0.3
LYH-4-144	0.444	0.051	0.0603	0.0018	0.0182	0.002	0.053	0.0062	377	11	330	24	0.3
LYH-4-145	0.455	0.033	0.0604	0.0026	0.0218	0.0016	0.0542	0.0043	378	16	340	16	0.5
LYH-4-146	0.458	0.035	0.061	0.0014	0.0179	0.0023	0.0554	0.0042	381.9	8.5	380	16	0.5
LYH-4-147	0.506	0.022	0.0658	0.0013	0.02118	0.00085	0.0563	0.0024	410.6	8.1	430	9	0.6
LYH-4-148	0.506	0.032	0.0668	0.0012	0.0248	0.0018	0.0549	0.0036	417.8	7.1	390	13	0.3
LYH-4-149	0.511	0.027	0.0676	0.0012	0.0226	0.001	0.055	0.003	421.6	7.4	370	11	0.1
LYH-4-150	0.525	0.032	0.0678	0.0012	0.0217	0.0014	0.0559	0.0034	422.5	7.1	440	12	1.1
LYH-4-151	0.523	0.019	0.0678	0.0013	0.02215	0.00086	0.0562	0.002	423.7	7.9	440	79	0.5
LYH-4-152	0.524	0.031	0.0683	0.0014	0.02195	0.00091	0.056	0.0032	425.6	8.4	400	11	0.3
LYH-4-153	0.517	0.018	0.06838	0.00099	0.02276	0.00061	0.0548	0.0019	426.3	5.9	367	73	0.2
LYH-4-154	0.534	0.028	0.0689	0.0016	0.02434	0.00096	0.0566	0.0032	429.2	9.5	440	12	0.7
LYH-4-155	0.539	0.027	0.069	0.0011	0.0225	0.00096	0.0568	0.0028	430	6.4	411	95	0.2
LYH-4-156	0.542	0.026	0.0697	0.0013	0.02395	0.00085	0.0558	0.0027	434	8.1	410	10	0.7
LYH-4-157	0.528	0.016	0.0697	0.00083	0.02326	0.00053	0.0559	0.0017	434.2	5	443	64	1
LYH-4-158	0.545	0.021	0.07004	0.00085	0.02332	0.00085	0.0569	0.0023	436.9	5.2	450	86	0.9
LYH-4-159	0.533	0.023	0.0703	0.0012	0.0246	0.0011	0.055	0.0025	437.6	7.1	411	95	0.6
LYH-4-160	0.536	0.025	0.0706	0.001	0.02393	0.00072	0.0553	0.0027	439.5	6.2	383	97	0.8
LYH-4-161	0.541	0.015	0.07072	0.00078	0.02331	0.00049	0.0557	0.0014	440.4	4.7	426	55	0.8
LYH-4-162	0.542	0.021	0.0708	0.00091	0.02339	0.00066	0.0565	0.0022	440.9	5.5	440	83	0.4
LYH-4-163	0.56	0.034	0.071	0.0022	0.0229	0.0015	0.0573	0.0033	442	13	450	12	0.2
LYH-4-164	0.55	0.015	0.07118	0.0007	0.02412	0.00044	0.0557	0.0014	443.2	4.2	424	55	0.1
LYH-4-165	0.551	0.022	0.0711	0.0011	0.02497	0.00095	0.0561	0.0023	443.2	6.4	445	83	0.2
LYH-4-166	0.549	0.032	0.0712	0.0012	0.02376	0.00098	0.0555	0.0032	443.5	7.4	390	12	0.1
LYH-4-167	0.54	0.024	0.0713	0.0018	0.0236	0.00096	0.0552	0.0022	444	11	397	89	0.2
LYH-4-168	0.557	0.059	0.0715	0.0021	0.04	0.016	0.058	0.0065	445	13	490	23	0.2
LYH-4-169	0.57	0.1	0.0717	0.0048	0.0269	0.003	0.057	0.01	446	29	470	30	0.2
LYH-4-170	0.556	0.018	0.07174	0.00099	0.02464	0.00065	0.0565	0.0018	446.5	6	462	69	0.8
LYH-4-171	0.558	0.021	0.0717	0.001	0.02377	0.00066	0.0571	0.0021	446.6	6.1	481	75	0.8
LYH-4-172	0.56	0.018	0.07204	0.00097	0.02425	0.00085	0.0564	0.0017	448.3	5.8	448	67	0.6
LYH-4-173	0.564	0.032	0.072	0.0012	0.024	0.0012	0.0568	0.0033	449	7.2	460	12	0.4
LYH-4-174	0.559	0.026	0.0722	0.0011	0.0239	0.00078	0.0564	0.0024	449.3	6.5	458	89	0.3
LYH-4-175	0.577	0.053	0.0728	0.002	0.0267	0.0022	0.058	0.0056	453	12	470	20	0.7
LYH-4-176	0.579	0.028	0.0732	0.001	0.0244	0.0038	0.0575	0.0027	455.1	6.2	510	11	1.3
LYH-4-177	0.583	0.07	0.0733	0.0028	0.0252	0.0027	0.0594	0.0072	456	17	540	26	0.7
LYH-4-178	0.567	0.015	0.0734	0.00095	0.02511	0.00063	0.0559	0.0015	456.5	5.7	444	61	0.2
LYH-4-179	0.574	0.034	0.0735	0.0015	0.0236	0.0011	0.0561	0.0035	456.9	9.1	430	13	0
LYH-4-180	0.6	0.13	0.0736	0.0036	0.026	0.0032	0.058	0.011	458	21	440	39	2
LYH-4-181	0.576	0.022	0.074	0.0011	0.02326	0.00079	0.056	0.0023	460	6.7	416	87	0.2
LYH-4-182	0.584	0.026	0.0742	0.001	0.02381	0.00067	0.0574	0.0026	461.4	6.2	464	89	0.6
LYH-4-183	0.585	0.03	0.0753	0.0013	0.0278	0.0016	0.0569	0.0029	468	7.6	460	11	0
LYH-4-184	0.597	0.027	0.076	0.0014	0.025	0.0013	0.0577	0.0026	471.7	8.2	468	95	0.5
LYH-4-185	0.598	0.027	0.0764	0.0018	0.02513	0.00072	0.056	0.0025	472.2	9.9	400	88	0.9
LYH-4-186	0.604	0.042	0.0772	0.0018	0.0246	0.0015	0.0571	0.0041	479	11	430	14	0.2
LYH-4-187	1.065	0.053	0.1203	0.0019	0.0384	0.0018	0.0636	0.0031	732	11	710	10	0.7
LYH-4-188	1.162	0.09	0.1272	0.0027	0.0426	0.0028	0.0663	0.0048	772	15	750	15	0.5
LYH-4-189	1.215	0.066	0.134	0.0031	0.0417	0.0045	0.0669	0.0035	811	18	850	11	0.9
LYH-4-190	1.405	0.069	0.1472	0.0028	0.0496	0.0028	0.069	0.0033	884	15	880	10	0.2
LYH-4-191	1.462	0.072	0.1508	0.0031	0.0478	0.0038	0.0705	0.0032	905	18	937	89	0.7
LYH-4-192	1.483	0.04	0.1536	0.002	0.0512	0.0017	0.0697	0.0019	921	11	907	56	0.3
LYH-4-193	1.497	0.092	0.1541	0.0032	0.0528	0.0024	0.0703	0.0044	924	18	930	12	0
LYH-4-194	1.487	0.028	0.1543	0.0021	0.0492	0.0018	0.0698	0.0014	925	12	924	42	0.2
LYH-4-195	1.519	0.046	0.1557	0.0018	0.0501	0.0019	0.0709	0.0021	933.6	9.8	971	57	0.5
LYH-4-196	1.553	0.069	0.1576	0.0026	0.0527	0.0016	0.0713	0.0031	945	14	934	89	0
LYH-4-197	1.559	0.05	0.1581	0.0025	0.0602	0.002	0.0718	0.002	946	14	968	58	0.4
LYH-4-198	1.594	0.065	0.1622	0.0025	0.0548	0.0018	0.0705	0.003	969	14	910	87	0
LYH-4-199	2.11	0.058	0.1948	0.0028	0.0612	0.0019	0.0781	0.002	1147	15	1147	49	0.3
LYH-4-200	2.66	0.16	0.2242	0.0058	0.0754	0.005	0.0862	0.005	1302	31	1340	11	0.2
LYH-4-201	3	0.33	0.239	0.012	0.098	0.014	0.0954	0.009	1391	68	1490	19	0.7
LYH-4-202	3.007	0.062	0.2431	0.0027	0.0801	0.0019	0.0894	0.0019	1402	14	1403	37	0.1
LYH-4-203	3.18	0.18	0.2514	0.006	0.0847	0.0043	0.0922	0.0058	1450	32	1420	13	0.1
LYH-4-204	3.78	0.47	0.279	0.015	0.0858	0.0084	0.098	0.016	1588	74	1560	28	0.4
LYH-4-205	4.38	0.16	0.3002	0.0086	0.1004	0.0033	0.1059	0.0024	1696	42	1725	43	0.4
LYH-4-206	4.39	0.36	0.303	0.028	0.101	0.012	0.107	0.012	1700	14	1720	22	0.3
LYH-4-207	4.54	0.33	0.309	0.013	0.0915	0.0095	0.1058	0.0082	1732	63	1740	14	0.5
LYH-4-208	4.67	0.22	0.3115	0.0061	0.1011	0.0054	0.1106	0.0047	1749	31	1755	76	0.1
LYH-4-209	4.87	0.56	0.316	0.011	0.105	0.011	0.111	0.011	1770	52	1780	20	0.6
LYH-4-210	4.833	0.085	0.3196	0.0036	0.1026	0.0033	0.1108	0.0021	1788	17	1805	34	0.1
LYH-4-211	5.25	0.16	0.3346	0.0061	0.104	0.0038	0.1125	0.0032	1859	30	1837	51	0.2
LYH-4-212	5.474	0.093	0.3421	0.0036	0.1068	0.0028	0.1161	0.0017	1896	17	1896	26	0.1
LYH-4-213	5.63	0.11	0.3472	0.0047	0.1114	0.0045	0.1165	0.0027	1920	23	1903	41	0.2
LYH-4-214	5.75	0.14	0.3523	0.0047	0.1097	0.0034	0.1174	0.0029	1944	23	1910	44	0.2
LYH-4-215	5.76	0.13	0.3531	0.0044	0.1051	0.003	0.1201	0.0024	1948	21	1944	37	0.1
LYH-4-216	6.26	0.13	0.3668	0.005	0.1127	0.0027	0.1213	0.0023	2014	24	1978	35	0.1
LYH-4-217	7.45	0.15	0.3997	0.0061	0.1242	0.0032	0.1332	0.0021	2166	28	2135	27	0
LYH-4-218	7.82	0.11	0.4095	0.0045	0.1286	0.003	0.1388	0.0018	2211	21	2211	22	0
LYH-4-219	8.14	0.19	0.4159	0.0064	0.1271	0.0031	0.1428	0.0022	2242	29	2262	27	0
LYH-4-220	9.34	0.49	0.4392	0.0089	0.1296	0.0065	0.1541	0.0074	2346	40	2400	82	0.4
LYH-4-221	10.46	0.12	0.4692	0.0043	0.1401	0.0045	0.1622	0.0016	2479	19	2479	17	0
LYH-4-222	10.8	1.3	0.469	0.024	0.154	0.015	0.165	0.017	2480	11	2540	16	0.4
LYH-4-223	11.24	0.4	0.4816	0.0093	0.1522	0.0063	0.1668	0.0049	2534	40	2534	54	0.2
LYH-4-224	11.43	0.4	0.4841	0.0067	0.1433	0.0053	0.1729	0.0057	2550	29	2569	57	0
LYH-4-225	11.62	0.22	0.4918	0.0071	0.1499	0.0042	0.1708	0.0029	2576	31	2564	28	0.1
LYH-4-226	15.22	0.25	0.5522	0.0076	0.1618	0.0039	0.1998	0.0027	2832	32	2826	22	0
LYH-5
LYH-5-1	0.1523	0.0053	0.02193	0.00021	0.00652	0.00019	0.0503	0.0018	139.8	1.3	194	7	2.7
LYH-5-2	0.26	0.028	0.0369	0.0011	0.0135	0.0016	0.0502	0.0059	233.5	6.6	220	24	0.2
LYH-5-3	0.264	0.02	0.03774	0.0008	0.0119	0.00067	0.0494	0.0037	239.4	4.9	220	14	0.7
LYH-5-4	0.29	0.13	0.0384	0.005	0.0178	0.0066	0.059	0.028	243	31	190	87	1.2
LYH-5-5	0.274	0.01	0.03855	0.00053	0.01219	0.00034	0.0525	0.002	243.8	3.3	282	77	0.5
LYH-5-6	0.272	0.024	0.0386	0.001	0.01197	0.00087	0.0522	0.005	243.9	6.4	230	18	0.8
LYH-5-7	0.274	0.018	0.03874	0.00072	0.01252	0.00074	0.0516	0.0034	244.9	4.4	250	13	0.8
LYH-5-8	0.274	0.014	0.03932	0.00064	0.0119	0.00083	0.0508	0.0027	248.5	4	230	10	1
LYH-5-9	0.283	0.019	0.03951	0.00083	0.01253	0.00075	0.0499	0.0027	249.8	5.2	210	12	0.9
LYH-5-10	0.299	0.029	0.0398	0.0012	0.01304	0.00077	0.0537	0.0053	250.1	6.7	220	17	1.2
LYH-5-11	0.291	0.035	0.0397	0.0013	0.015	0.0015	0.0552	0.007	251.2	7.8	320	24	1.1
LYH-5-12	0.273	0.024	0.03967	0.00085	0.01428	0.0008	0.053	0.0049	251.3	5.4	280	17	1.3
LYH-5-13	0.286	0.012	0.0406	0.00055	0.01191	0.00071	0.0516	0.0021	256.5	3.4	243	78	0.9
LYH-5-14	0.298	0.02	0.04062	0.00085	0.01188	0.00043	0.0531	0.0036	256.6	5.3	240	13	1.3
LYH-5-15	0.297	0.039	0.0407	0.0013	0.01186	0.00078	0.0539	0.0076	257.3	7.9	220	25	0.9
LYH-5-16	0.293	0.025	0.0409	0.0011	0.014	0.0011	0.0522	0.0047	258	7	280	17	0.4
LYH-5-17	0.285	0.018	0.04097	0.00082	0.01343	0.00063	0.0506	0.0033	258.8	5.1	230	13	0.3
LYH-5-18	0.293	0.008	0.04106	0.00039	0.01334	0.00042	0.0521	0.0013	259.4	2.4	270	54	0.3
LYH-5-19	0.295	0.058	0.0417	0.0018	0.0132	0.0017	0.051	0.011	263	11	210	41	0.8
LYH-5-20	0.302	0.037	0.0419	0.0025	0.0143	0.0017	0.0528	0.0062	264	16	250	22	0
LYH-5-21	0.295	0.016	0.04212	0.00086	0.01444	0.00071	0.0514	0.003	266.4	5.3	220	11	1.7
LYH-5-22	0.308	0.015	0.04269	0.00047	0.01363	0.00046	0.0529	0.0026	269.5	2.9	320	11	1.3
LYH-5-23	0.287	0.087	0.0428	0.0035	0.013	0.0037	0.047	0.014	270	22	120	54	0.4
LYH-5-24	0.304	0.013	0.04351	0.00063	0.01515	0.00051	0.0512	0.0023	274.5	3.9	234	85	1.3
LYH-5-25	0.313	0.015	0.04405	0.00079	0.01461	0.0006	0.0522	0.0026	277.8	4.9	263	96	0.6
LYH-5-26	0.367	0.021	0.05024	0.00084	0.01702	0.0009	0.0542	0.0033	315.9	5.1	300	11	1.2
LYH-5-27	0.367	0.024	0.0502	0.0011	0.01603	0.00063	0.053	0.0035	316.1	6.6	270	12	0.7
LYH-5-28	0.374	0.023	0.05072	0.00082	0.01419	0.00067	0.0524	0.0033	318.9	5	310	13	0.7
LYH-5-29	0.41	0.19	0.0537	0.0053	0.0186	0.0059	0.053	0.021	337	32	240	77	0.9
LYH-5-30	0.407	0.025	0.05429	0.00097	0.01786	0.00075	0.0541	0.0035	341.2	6	320	12	0.5
LYH-5-31	0.43	0.034	0.0563	0.0018	0.018	0.0015	0.0547	0.0044	353	11	350	15	1.1
LYH-5-32	0.517	0.039	0.0671	0.0017	0.0231	0.0024	0.0558	0.0045	418	10	440	16	0.2
LYH-5-33	0.511	0.015	0.06743	0.00078	0.02207	0.00071	0.0552	0.0016	420.6	4.7	404	61	0.9
LYH-5-34	0.526	0.021	0.0693	0.0014	0.0213	0.0014	0.056	0.0023	432	8.6	445	88	0.5
LYH-5-35	0.553	0.024	0.0707	0.0011	0.02256	0.00084	0.0576	0.0024	441	6.4	476	86	0.5
LYH-5-36	0.554	0.019	0.07111	0.00075	0.0218	0.00058	0.0563	0.002	442.8	4.5	458	76	0.7
LYH-5-37	0.562	0.047	0.073	0.0025	0.0206	0.0015	0.0558	0.0049	454	15	470	21	0.7
LYH-5-38	0.567	0.022	0.0741	0.001	0.02436	0.00074	0.0556	0.0022	460.9	6.3	452	87	0.6
LYH-5-39	0.634	0.042	0.0798	0.0013	0.0229	0.0014	0.0587	0.0039	494.6	7.7	460	12	0.3
LYH-5-40	1.283	0.046	0.139	0.0018	0.0403	0.0016	0.0676	0.0023	839	10	857	78	0
LYH-5-41	2.022	0.061	0.1893	0.0028	0.0586	0.0015	0.0774	0.0021	1117	15	1124	54	0.2
LYH-5-42	2.88	0.13	0.2358	0.0035	0.0714	0.003	0.0875	0.0036	1364	18	1351	78	0.2
LYH-5-43	4.21	0.55	0.296	0.021	0.101	0.021	0.102	0.011	1670	10	1710	15	0.6
LYH-5-44	4.29	0.29	0.2998	0.0079	0.0946	0.007	0.1049	0.0068	1688	39	1700	12	0.2
LYH-5-45	4.33	0.24	0.3016	0.0076	0.0856	0.0048	0.1037	0.0059	1698	38	1650	11	0.2
LYH-5-46	4.47	0.39	0.303	0.011	0.0886	0.0058	0.1014	0.0075	1703	55	1670	14	0.1
LYH-5-47	4.5	0.14	0.3057	0.0036	0.09	0.0022	0.1071	0.0031	1719	18	1749	53	0.2
LYH-5-48	4.49	0.2	0.3062	0.0052	0.102	0.0049	0.1068	0.0048	1720	26	1735	84	0.1
LYH-5-49	4.49	0.25	0.307	0.015	0.094	0.015	0.1049	0.009	1726	74	1700	16	0.1
LYH-5-50	4.56	0.45	0.309	0.014	0.0815	0.0044	0.109	0.011	1736	68	1770	18	0.2
LYH-5-51	4.46	0.22	0.3101	0.006	0.1006	0.0051	0.1053	0.0053	1739	30	1736	92	0.1
LYH-5-52	4.56	0.42	0.31	0.017	0.0755	0.0035	0.1076	0.0092	1739	83	1740	16	0.2
LYH-5-53	4.8	0.54	0.314	0.016	0.104	0.011	0.107	0.011	1756	77	1730	21	0.1
LYH-5-54	4.8	0.24	0.3206	0.009	0.0974	0.0043	0.1074	0.005	1791	44	1754	89	0.3
LYH-5-55	4.92	0.56	0.3223	0.0083	0.1	0.016	0.114	0.011	1801	40	1840	18	0.2
LYH-5-56	5.17	0.45	0.332	0.013	0.095	0.011	0.115	0.01	1844	62	1940	16	0.2
LYH-5-57	5.19	0.1	0.3317	0.0048	0.1015	0.0041	0.1136	0.0023	1846	23	1852	36	0.2
LYH-5-58	5.29	0.1	0.3358	0.0058	0.0991	0.0033	0.1129	0.0021	1865	28	1841	33	0
LYH-5-59	5.349	0.088	0.3375	0.0029	0.0869	0.0031	0.1151	0.0017	1874	14	1875	26	0.1
LYH-5-60	5.315	0.084	0.3375	0.0033	0.0907	0.0029	0.1143	0.0015	1874	16	1866	24	0.2
LYH-5-61	5.37	0.12	0.3377	0.0033	0.1039	0.0033	0.116	0.0026	1875	16	1889	40	0.1
LYH-5-62	5.33	0.13	0.3378	0.0037	0.0935	0.0029	0.1151	0.0026	1875	18	1875	41	0.2
LYH-5-63	5.35	0.26	0.3391	0.0065	0.0888	0.005	0.1163	0.0045	1882	31	1893	73	0.1
LYH-5-64	5.41	0.16	0.3408	0.0059	0.0865	0.0037	0.116	0.0024	1890	29	1892	37	0.1
LYH-5-65	5.49	0.21	0.3427	0.0079	0.0701	0.004	0.1152	0.0041	1898	38	1880	67	0.1
LYH-5-66	5.54	0.25	0.343	0.013	0.1079	0.0073	0.1176	0.005	1899	60	1916	79	0.1
LYH-5-67	5.47	0.26	0.3432	0.0052	0.0896	0.0049	0.1131	0.0049	1902	25	1877	80	0.1
LYH-5-68	5.562	0.099	0.3437	0.0026	0.0961	0.0014	0.1154	0.0019	1904	13	1882	29	0.2
LYH-5-69	5.56	0.27	0.3462	0.0091	0.1064	0.0062	0.1169	0.0042	1915	43	1895	65	0
LYH-5-70	5.59	0.23	0.3445	0.0062	0.0984	0.0042	0.1196	0.0053	1917	32	1949	80	0.1
LYH-5-71	5.73	0.24	0.3484	0.0093	0.1014	0.0071	0.1202	0.0049	1925	45	1960	70	0.1
LYH-5-72	5.84	0.18	0.3536	0.005	0.109	0.0036	0.1218	0.0036	1951	24	1971	54	0.1
LYH-5-73	6.81	0.33	0.381	0.011	0.1206	0.0068	0.131	0.0062	2079	51	2120	81	0.1
LYH-5-74	7.51	0.41	0.3986	0.0096	0.1143	0.0089	0.1377	0.0072	2161	44	2178	91	0.2
LYH-5-75	7.69	0.18	0.4045	0.0036	0.1215	0.0039	0.1387	0.0027	2189	17	2213	34	0.1
LYH-5-76	8.12	0.15	0.4099	0.004	0.1207	0.0032	0.1428	0.0026	2213	18	2257	32	1.3
LYH-5-77	7.92	0.36	0.412	0.0054	0.1184	0.0052	0.1394	0.006	2223	25	2235	75	0.2
LYH-5-78	8.02	0.32	0.415	0.024	0.121	0.013	0.1409	0.0098	2240	11	2230	12	0.4
LYH-5-79	9.66	0.5	0.446	0.01	0.1222	0.0078	0.1562	0.008	2373	45	2382	86	0
LYH-5-80	9.98	0.18	0.4478	0.0051	0.1312	0.0029	0.1589	0.0023	2384	23	2445	24	2.1
LYH-5-81	9.99	0.72	0.457	0.023	0.138	0.018	0.16	0.013	2426	99	2490	15	0.1
LYH-5-82	10.04	0.22	0.4608	0.0045	0.1146	0.0022	0.1586	0.0026	2442	20	2442	28	0.2
LYH-5-83	10.13	0.39	0.461	0.014	0.1336	0.0077	0.1586	0.0066	2444	60	2470	71	0
LYH-5-84	10.12	0.36	0.461	0.012	0.126	0.012	0.1659	0.0084	2445	54	2511	86	0
LYH-5-85	10.38	0.58	0.4649	0.0088	0.1425	0.0068	0.1647	0.0087	2460	39	2482	86	0
LYH-5-86	10.28	0.67	0.465	0.025	0.126	0.019	0.1568	0.0067	2460	11	2419	74	0.1
LYH-5-87	10.48	0.32	0.464	0.012	0.163	0.011	0.164	0.0045	2469	55	2491	45	0.1
LYH-5-88	10.57	0.18	0.4703	0.0058	0.1441	0.0041	0.1634	0.0025	2485	26	2491	27	0
LYH-5-89	10.67	0.31	0.4714	0.0086	0.1238	0.004	0.1623	0.0047	2487	38	2479	50	0
LYH-5-90	10.7	0.18	0.4734	0.0049	0.1257	0.0058	0.1649	0.0027	2499	21	2507	28	0.1
LYH-5-91	10.83	0.49	0.476	0.01	0.1434	0.0061	0.1634	0.007	2506	44	2478	75	0.1
LYH-5-92	10.91	0.31	0.4756	0.0089	0.1373	0.0049	0.1667	0.0039	2506	39	2526	39	0.2
LYH-5-93	11.05	0.8	0.479	0.013	0.135	0.011	0.17	0.012	2517	58	2520	11	0
LYH-5-94	11.4	1.1	0.484	0.031	0.165	0.016	0.17	0.017	2540	13	2530	16	0.1
LYH-5-95	11.27	0.71	0.484	0.015	0.1222	0.0039	0.1695	0.0082	2545	66	2549	81	0.1
LYH-5-96	11.32	0.49	0.486	0.012	0.1393	0.0071	0.1647	0.0061	2548	50	2504	64	0.1
LYH-5-97	11.44	0.46	0.488	0.011	0.162	0.011	0.173	0.0064	2567	47	2584	59	0.1
LYH-5-98	11.58	0.16	0.4895	0.004	0.1276	0.0022	0.1726	0.0022	2568	17	2585	22	0.1
LYH-5-99	11.72	0.24	0.4915	0.0073	0.1423	0.0038	0.1741	0.0039	2579	31	2596	38	0
LYH-5-100	12.26	0.19	0.5018	0.0062	0.1368	0.0045	0.1787	0.0024	2624	27	2642	22	0
LYH-6
LYH-6-1	0.18	0.018	0.02632	0.0009	-0.00392	0.00032	0.0471	0.0045	167.4	5.6	90	18	0.2
LYH-6-2	0.219	0.02	0.0308	0.00074	0.017	0.017	0.0497	0.0045	195.5	4.6	130	16	0.3
LYH-6-3	0.226	0.011	0.03168	0.00049	0.0181	0.0026	0.0509	0.0025	201	3.1	220	9	1.9
LYH-6-4	0.227	0.025	0.03178	0.00092	0.0162	0.0024	0.0533	0.0059	201.6	5.8	170	19	0.7
LYH-6-5	0.221	0.015	0.03178	0.00062	0.0123	0.0013	0.0497	0.0034	202	3.8	190	13	0
LYH-6-6	0.2198	0.0094	0.03196	0.0005	0.0119	0.0011	0.0502	0.0022	202.8	3.1	189	86	0.1
LYH-6-7	0.228	0.015	0.03206	0.00065	0.027	0.012	0.0512	0.0032	203.4	4.1	270	12	1.3
LYH-6-8	0.225	0.013	0.03232	0.0005	0.0319	0.007	0.049	0.0028	205	3.1	170	11	1
LYH-6-9	0.23	0.012	0.03245	0.00058	0.0139	0.0016	0.0517	0.0028	205.8	3.6	260	10	1.1
LYH-6-10	0.224	0.013	0.0326	0.00076	0.00587	0.00041	0.051	0.0029	206.8	4.8	240	12	0.4
LYH-6-11	0.2277	0.0085	0.0327	0.00041	0.019	0.011	0.05	0.0017	207.4	2.6	199	67	0.1
LYH-6-12	0.228	0.02	0.03297	0.00094	0.00737	0.00051	0.0507	0.0044	209.6	5.9	180	16	0.2
LYH-6-13	0.2338	0.0071	0.03372	0.00035	0.024	0.016	0.0502	0.0016	213.8	2.2	193	65	0.3
LYH-6-14	0.238	0.015	0.03385	0.00082	0.00868	0.0006	0.0504	0.0032	214.6	5.1	200	12	1.1
LYH-6-15	0.238	0.012	0.03432	0.00052	0.0175	0.0024	0.0491	0.0025	217.5	3.2	163	97	0.7
LYH-6-16	0.239	0.01	0.03432	0.00047	0.0174	0.0023	0.0509	0.0021	217.5	2.9	215	82	0.2
LYH-6-17	0.2444	0.0082	0.03458	0.00049	0.01104	0.00091	0.0511	0.0018	219.1	3	235	72	1.2
LYH-6-18	0.243	0.017	0.0349	0.001	0.0068	0.00051	0.0527	0.0038	221.2	6.3	270	14	0.5
LYH-6-19	0.2429	0.0096	0.03503	0.00048	0.018	0.018	0.0503	0.002	221.9	3	204	76	0.8
LYH-6-20	0.245	0.012	0.0352	0.00052	0.014	0.012	0.0501	0.0023	222.9	3.2	177	9	0.4
LYH-6-21	0.2473	0.0092	0.03525	0.00055	0.019	0.012	0.0498	0.0019	223.2	3.4	202	74	0.2
LYH-6-22	0.2519	0.0077	0.03541	0.00049	0.01112	0.00076	0.0505	0.0015	224.3	3.1	225	63	1.4
LYH-6-23	0.251	0.018	0.03547	0.00077	0.00813	0.0005	0.0517	0.0038	224.6	4.8	230	14	0.3
LYH-6-24	0.2541	0.0096	0.03564	0.00049	0.00961	0.00068	0.0528	0.002	225.7	3	298	78	1.8
LYH-6-25	0.249	0.012	0.03568	0.00053	0.021	0.0094	0.0511	0.0025	226	3.3	231	91	0.3
LYH-6-26	0.2589	0.0094	0.03685	0.00047	0.018	0.012	0.0509	0.0018	233.2	2.9	216	70	0.3
LYH-6-27	0.2655	0.0075	0.03786	0.00038	0.0251	0.0075	0.0506	0.0014	239.7	2.4	209	58	0
LYH-6-28	0.268	0.012	0.03802	0.00058	0.015	0.016	0.0528	0.0023	240.5	3.6	272	86	0.4
LYH-6-29	0.285	0.011	0.03976	0.0006	0.01157	0.00096	0.0525	0.0021	251.3	3.7	284	81	1.7
LYH-6-30	0.314	0.021	0.04297	0.00071	0.0193	0.0023	0.052	0.0035	271.1	4.4	260	13	0.3
LYH-6-31	0.327	0.022	0.04572	0.00097	0.01145	0.0009	0.0516	0.0035	288.1	6	280	13	0.7
LYH-6-32	0.337	0.025	0.0465	0.001	0.0185	0.002	0.0522	0.0039	292.7	6.4	240	14	0.6
LYH-6-33	0.501	0.025	0.0655	0.0011	0.0359	0.0053	0.0566	0.003	408.7	6.6	390	11	0.6
LYH-6-34	0.494	0.028	0.0655	0.0012	0.039	0.042	0.0558	0.0033	408.8	7.1	400	11	0.2
LYH-6-35	0.5	0.036	0.0662	0.0017	0.09	0.053	0.0543	0.004	413	10	360	14	0
LYH-6-36	0.491	0.024	0.0664	0.0012	0.0243	0.002	0.055	0.0026	414.3	7.2	397	98	1.8
LYH-6-37	0.5	0.015	0.06635	0.00075	0.0243	0.0025	0.0554	0.0016	414.5	4.5	407	62	0.4
LYH-6-38	0.511	0.027	0.0678	0.0012	0.074	0.04	0.0542	0.0028	422.8	7.1	350	10	0.9
LYH-6-39	0.517	0.026	0.0684	0.0011	0.069	0.02	0.0539	0.0027	426.5	6.5	329	99	0.4
LYH-6-40	0.554	0.033	0.0699	0.0014	0.021	0.0017	0.0566	0.0035	435.1	8.4	450	12	1.1
LYH-6-41	0.546	0.031	0.07	0.0011	0.0396	0.0058	0.0555	0.003	436.1	6.6	410	11	0
LYH-6-42	0.539	0.021	0.0704	0.00069	0.0317	0.0045	0.0551	0.0021	438.5	4.1	389	79	0.8
LYH-6-43	0.547	0.03	0.0705	0.0013	0.0367	0.0047	0.0562	0.003	438.8	7.6	400	11	0.2
LYH-6-44	0.544	0.013	0.07049	0.00079	0.035	0.023	0.0556	0.0013	439	4.7	417	50	0.1
LYH-6-45	0.545	0.019	0.07061	0.00091	0.063	0.022	0.0564	0.002	439.7	5.5	424	74	0.2
LYH-6-46	0.547	0.023	0.0707	0.0016	0.019	0.0011	0.0568	0.0025	440.3	9.6	469	96	0.2
LYH-6-47	0.549	0.022	0.0709	0.001	0.0328	0.0047	0.0553	0.0022	441.6	6.1	415	80	0.1
LYH-6-48	0.547	0.035	0.0712	0.0012	0.0318	0.0038	0.0555	0.0036	443.3	7.4	430	13	0.4
LYH-6-49	0.552	0.024	0.0713	0.0011	0.061	0.031	0.0566	0.0024	443.9	6.6	437	85	0.2
LYH-6-50	0.56	0.049	0.0713	0.0028	0.0137	0.0013	0.0585	0.0051	444	17	450	18	0.2
LYH-6-51	0.559	0.022	0.07135	0.00093	0.0225	0.0018	0.0567	0.0022	444.2	5.6	478	83	0.9
LYH-6-52	0.558	0.028	0.0716	0.0012	0.0401	0.0068	0.0559	0.0029	446.4	7.3	420	10	0.1
LYH-6-53	0.564	0.032	0.0717	0.0014	0.0196	0.0018	0.0574	0.0033	446.5	8.2	430	12	0.6
LYH-6-54	0.561	0.031	0.0718	0.0012	0.062	0.049	0.0558	0.0031	446.9	7	430	11	0.9
LYH-6-55	0.553	0.026	0.0718	0.0012	0.0362	0.0056	0.0562	0.0026	447	7.1	435	94	0.2
LYH-6-56	0.562	0.02	0.07189	0.00093	0.0231	0.0018	0.0558	0.0019	447.4	5.6	427	71	0.8
LYH-6-57	0.56	0.028	0.07188	0.00098	0.041	0.022	0.057	0.0029	447.9	6	433	99	0.7
LYH-6-58	0.554	0.015	0.07201	0.00082	0.0222	0.0019	0.0556	0.0015	448.2	4.9	419	61	0.3
LYH-6-59	0.558	0.02	0.072	0.001	0.031	0.039	0.0558	0.002	448.9	5.9	407	74	0.4
LYH-6-60	0.558	0.013	0.0722	0.00087	0.0271	0.0027	0.0559	0.0012	449.3	5.2	442	46	0.1
LYH-6-61	0.534	0.029	0.0723	0.0013	0.0231	0.0017	0.053	0.0029	449.7	8	320	11	3.9
LYH-6-62	0.56	0.025	0.0724	0.0011	0.0314	0.0037	0.0561	0.0026	450.2	6.7	435	95	0.2
LYH-6-63	0.55	0.019	0.07256	0.00087	0.041	0.047	0.055	0.002	451.4	5.2	405	76	0.8
LYH-6-64	0.566	0.025	0.0726	0.0011	0.04	0.03	0.0556	0.0023	451.6	6.7	407	86	0.1
LYH-6-65	0.572	0.019	0.073	0.001	0.0207	0.0014	0.0561	0.0018	455	6.3	425	70	0.4
LYH-6-66	0.573	0.025	0.0732	0.0012	0.0229	0.0021	0.0579	0.0026	455.2	7	487	93	0.4
LYH-6-67	0.567	0.029	0.0736	0.0015	0.01361	0.00081	0.0564	0.0028	457.7	9.1	450	11	0.8
LYH-6-68	0.57	0.019	0.07355	0.00089	0.0439	0.0064	0.0566	0.0019	457.8	5.4	459	71	0.2
LYH-6-69	0.573	0.018	0.0737	0.0011	0.038	0.045	0.0555	0.0017	458.4	6.4	420	67	0.1
LYH-6-70	0.575	0.036	0.0739	0.0019	0.0162	0.001	0.0575	0.0037	459	12	450	13	0.7
LYH-6-71	0.57	0.021	0.07424	0.00087	0.0302	0.0037	0.0556	0.0021	461.6	5.2	416	79	0.3
LYH-6-72	0.584	0.038	0.0745	0.003	0.01239	0.00083	0.0586	0.004	463	18	520	15	0.2
LYH-6-73	0.59	0.033	0.0746	0.0014	0.063	0.035	0.0576	0.0034	463.6	8.4	500	12	0.7
LYH-6-74	0.591	0.038	0.0752	0.0021	0.01338	0.00078	0.0574	0.004	467	13	440	14	0.6
LYH-6-75	0.579	0.044	0.0751	0.0025	0.0139	0.00076	0.0568	0.0041	467	15	420	15	0.4
LYH-6-76	0.594	0.02	0.07521	0.00087	0.0212	0.0017	0.0567	0.0018	467.4	5.2	486	68	1
LYH-6-77	0.62	0.052	0.0754	0.0017	0.021	0.0022	0.0598	0.005	469	10	460	15	0.2
LYH-6-78	0.6	0.028	0.0761	0.0019	0.0222	0.0018	0.0576	0.0027	473	11	478	94	0.2
LYH-6-79	0.592	0.029	0.0785	0.0012	0.02	0.0013	0.0555	0.0029	486.9	7.4	370	10	3.7
LYH-6-80	1.214	0.056	0.1344	0.002	0.0434	0.0031	0.0651	0.0028	812	12	759	86	0.4
LYH-6-81	1.451	0.038	0.1504	0.0025	0.035	0.0022	0.0699	0.0017	903	14	922	47	0.4
LYH-6-82	1.538	0.062	0.1551	0.0023	0.09	0.016	0.0696	0.0023	930	13	906	69	0.4
LYH-6-83	1.708	0.053	0.1697	0.0022	0.0627	0.0061	0.0724	0.0023	1011	12	995	62	0
LYH-6-84	2.142	0.065	0.1977	0.0027	0.092	0.011	0.0783	0.0023	1165	15	1158	58	0
LYH-6-85	3.42	0.27	0.249	0.014	0.0685	0.0057	0.101	0.0076	1462	59	1640	13	3.8
LYH-6-86	4.42	0.16	0.3027	0.0057	0.199	0.032	0.1089	0.0033	1705	28	1751	56	0.2
LYH-6-87	4.433	0.088	0.3047	0.003	0.159	0.027	0.105	0.0019	1715	15	1717	34	0.1
LYH-6-88	4.48	0.27	0.306	0.013	0.0814	0.0066	0.1076	0.0037	1726	63	1749	67	0.1
LYH-6-89	4.597	0.098	0.3114	0.0037	0.25	0.16	0.1075	0.0023	1746	18	1758	40	0
LYH-6-90	4.66	0.12	0.3124	0.0041	0.18	0.1	0.1091	0.0028	1755	20	1774	48	0.1
LYH-6-91	5.09	0.11	0.3285	0.0033	0.22	0.12	0.1116	0.0024	1830	16	1821	38	0.1
LYH-6-92	5	0.21	0.3291	0.007	0.241	0.054	0.1098	0.0049	1831	34	1783	81	0.1
LYH-6-93	5.09	0.17	0.3302	0.0046	0.212	0.086	0.11	0.0036	1838	22	1801	61	0.3
LYH-6-94	5.348	0.076	0.3362	0.0033	0.18	0.12	0.1144	0.0015	1869	16	1861	24	0.2
LYH-6-95	5.58	0.16	0.3458	0.0055	0.166	0.027	0.1172	0.0034	1912	26	1910	52	0.1
LYH-6-96	5.58	0.11	0.3453	0.0036	0.167	0.028	0.1174	0.002	1913	17	1906	31	0
LYH-6-97	5.6	0.1	0.3457	0.0038	0.23	0.12	0.1178	0.0021	1915	18	1923	33	0
LYH-6-98	6.24	0.21	0.3647	0.0076	0.0836	0.0039	0.1257	0.0036	2011	36	2023	52	0
LYH-6-99	6.33	0.29	0.3683	0.0067	0.148	0.011	0.1245	0.0049	2020	31	2008	72	0.1
LYH-6-100	8.9	0.18	0.4328	0.005	0.159	0.014	0.1488	0.0028	2323	22	2339	32	0
LYH-6-101	9.34	0.24	0.4434	0.0057	0.163	0.019	0.1529	0.0038	2368	26	2388	42	0.1
LYH-6-102	9.91	0.36	0.451	0.01	0.1206	0.0054	0.1598	0.006	2399	45	2445	64	1
LYH-6-103	10.27	0.25	0.4664	0.0084	0.088	0.0044	0.1615	0.003	2466	37	2472	32	0
LYH-6-104	10.51	0.24	0.4696	0.006	0.218	0.024	0.1595	0.0037	2480	26	2446	37	0.1
LYH-6-105	10.7	0.36	0.4718	0.0076	0.31	0.29	0.163	0.0051	2495	34	2477	53	0
LYH-6-106	11.14	0.27	0.4819	0.0064	0.18	0.021	0.1667	0.0039	2533	28	2520	40	0
LYH-6-107	11.41	0.26	0.4848	0.0077	0.155	0.012	0.1709	0.0037	2548	34	2561	37	0.2
LYH-6-108	11.68	0.55	0.4915	0.0099	0.222	0.018	0.1704	0.0071	2581	42	2561	71	0
LYH-7
LYH-7-1	0.1672	0.0081	0.02528	0.00035	0.00763	0.00054	0.0477	0.0023	160.9	2.2	102	89	2.4
LYH-7-2	0.189	0.012	0.02715	0.00088	0.00932	0.00048	0.0509	0.0028	172.6	5.5	230	10	0.4
LYH-7-3	0.208	0.025	0.02921	0.00098	0.00941	0.00078	0.0503	0.0058	185.5	6.1	220	21	0.8
LYH-7-4	0.245	0.028	0.03551	0.00097	0.0114	0.0011	0.0499	0.0061	224.9	6.1	190	21	0.4
LYH-7-5	0.24	0.069	0.0355	0.0029	0.0108	0.0013	0.056	0.016	225	18	250	54	0.4
LYH-7-6	0.268	0.037	0.0375	0.0029	0.0111	0.0023	0.0514	0.0052	238	18	240	21	0.8
LYH-7-7	0.279	0.045	0.0399	0.0013	0.012	0.0014	0.0506	0.0085	252.4	7.9	210	30	0.2
LYH-7-8	0.294	0.015	0.04147	0.0007	0.01256	0.00059	0.0505	0.0025	261.9	4.3	239	94	0.3
LYH-7-9	0.3	0.03	0.04169	0.00084	0.01274	0.00085	0.0511	0.0049	263.2	5.2	160	17	1.2
LYH-7-10	0.296	0.047	0.0425	0.0016	0.0131	0.0011	0.0537	0.009	268	9.9	330	34	0
LYH-7-11	0.33	0.037	0.0437	0.0013	0.014	0.0013	0.0542	0.0064	275.7	7.9	240	21	0.1
LYH-7-12	0.33	0.15	0.0449	0.0079	0.0161	0.0046	0.053	0.023	283	49	260	85	1.1
LYH-7-13	0.343	0.074	0.0464	0.0023	0.0131	0.0029	0.055	0.011	292	14	310	40	1.4
LYH-7-14	0.352	0.038	0.047	0.0012	0.014	0.00099	0.054	0.0054	296.3	7.6	330	19	1.2
LYH-7-15	0.364	0.032	0.0502	0.0014	0.0161	0.0022	0.0535	0.005	315.6	8.6	290	17	0.8
LYH-7-16	0.387	0.051	0.0501	0.002	0.0144	0.0014	0.0548	0.0072	316	12	290	24	1.3
LYH-7-17	0.4	0.23	0.0504	0.0047	0.0183	0.007	0.058	0.034	317	29	300	12	0.9
LYH-7-18	0.387	0.092	0.0515	0.003	0.0177	0.0038	0.057	0.014	323	18	290	45	1.2
LYH-7-19	0.4	0.038	0.0527	0.0012	0.0174	0.0012	0.0546	0.005	331	7	290	17	1.2
LYH-7-20	0.422	0.033	0.0577	0.0013	0.018	0.0016	0.0534	0.0043	361.2	7.9	270	15	0.8
LYH-7-21	0.46	0.14	0.061	0.0059	0.0211	0.008	0.055	0.016	381	36	330	60	0.5
LYH-7-22	0.494	0.028	0.0639	0.0014	0.021	0.0017	0.0568	0.003	400.1	8.7	460	11	0.2
LYH-7-23	0.515	0.086	0.0668	0.0043	0.0203	0.0051	0.0542	0.0084	417	26	350	34	0.5
LYH-7-24	0.533	0.071	0.0675	0.0017	0.0213	0.0024	0.0576	0.0076	421	10	430	27	1
LYH-7-25	0.537	0.035	0.0683	0.0013	0.02111	0.00073	0.0571	0.0036	425.7	7.8	430	12	0.1
LYH-7-26	0.536	0.051	0.0689	0.0017	0.021	0.0013	0.056	0.0051	429	10	390	18	0.9
LYH-7-27	0.544	0.087	0.0689	0.0027	0.0264	0.0043	0.0583	0.0095	430	16	410	31	0.9
LYH-7-28	0.532	0.029	0.0691	0.0012	0.023	0.001	0.0555	0.0033	431.4	7.2	390	11	0.6
LYH-7-29	0.546	0.037	0.0711	0.0011	0.0256	0.0028	0.0547	0.0037	442.4	6.3	360	13	0.8
LYH-7-30	0.544	0.043	0.0714	0.0015	0.0208	0.0013	0.0549	0.0036	444.5	9.3	430	14	0.1
LYH-7-31	0.532	0.042	0.0714	0.0017	0.0219	0.0014	0.054	0.0045	445	10	400	16	0.9
LYH-7-32	0.556	0.051	0.0722	0.002	0.0243	0.0018	0.0574	0.0055	449	12	450	18	0.4
LYH-7-33	0.58	0.054	0.0727	0.0018	0.0237	0.0017	0.0574	0.0053	452	11	400	17	0.2
LYH-7-34	0.593	0.058	0.0738	0.0019	0.0212	0.0012	0.0593	0.0059	459	12	350	18	0.4
LYH-7-35	0.6	0.076	0.0747	0.0028	0.0226	0.0024	0.0578	0.0072	464	17	530	25	0.4
LYH-7-36	0.61	0.1	0.075	0.0035	0.0241	0.0028	0.06	0.01	466	21	440	31	0
LYH-7-37	0.589	0.04	0.0757	0.0014	0.0235	0.0013	0.0564	0.0037	470.3	8.3	420	13	0.8
LYH-7-38	0.61	0.036	0.0762	0.0013	0.0241	0.001	0.0572	0.0032	472.9	7.8	460	11	0.4
LYH-7-39	0.609	0.034	0.0771	0.0018	0.0248	0.0011	0.0593	0.0038	478	11	410	11	0.8
LYH-7-40	0.692	0.069	0.0839	0.0024	0.0288	0.0025	0.0599	0.0054	519	14	540	19	0.8
LYH-7-41	0.815	0.096	0.0972	0.0029	0.0356	0.0046	0.0607	0.0068	598	17	570	24	0.2
LYH-7-42	0.89	0.18	0.1005	0.0046	0.1	0.079	0.063	0.013	617	27	510	40	0.2
LYH-7-43	0.855	0.087	0.1007	0.0029	0.0331	0.0027	0.0624	0.0059	618	17	640	19	0.2
LYH-7-44	0.96	0.33	0.107	0.013	0.037	0.0077	0.064	0.018	657	77	590	59	0.5
LYH-7-45	1.03	0.18	0.1155	0.0052	0.035	0.012	0.066	0.013	705	30	810	41	0.6
LYH-7-46	1.13	0.31	0.125	0.012	0.036	0.015	0.066	0.016	757	68	720	55	0.9
LYH-7-47	1.15	0.17	0.1285	0.0067	0.0581	0.0096	0.066	0.01	779	38	690	33	0.4
LYH-7-48	1.217	0.068	0.131	0.0022	0.0438	0.0024	0.067	0.0036	793	13	780	11	0.5
LYH-7-49	1.2	0.1	0.1321	0.0038	0.0421	0.0031	0.0656	0.0052	803	23	800	17	0.1
LYH-7-50	1.28	0.11	0.1355	0.0033	0.0397	0.0037	0.0672	0.0058	819	19	770	19	0.4
LYH-7-51	1.34	0.17	0.1403	0.0042	0.0404	0.0072	0.0701	0.0085	846	23	740	25	0.2
LYH-7-52	1.36	0.14	0.1435	0.0048	0.0391	0.003	0.0717	0.008	864	27	870	24	0.2
LYH-7-53	1.415	0.093	0.1452	0.0034	0.0433	0.0023	0.0705	0.0042	874	19	850	13	0.2
LYH-7-54	1.56	0.32	0.151	0.012	0.056	0.012	0.075	0.016	905	65	770	42	0.6
LYH-7-55	1.49	0.2	0.151	0.0063	0.0423	0.0077	0.0708	0.0094	906	35	860	29	0.2
LYH-7-56	1.53	0.25	0.151	0.0057	0.0592	0.0072	0.072	0.011	913	33	820	29	0.3
LYH-7-57	1.46	0.13	0.1534	0.0037	0.0431	0.0041	0.0679	0.0063	919	21	840	19	0.4
LYH-7-58	1.47	0.13	0.1528	0.0077	0.0446	0.0033	0.0697	0.0048	921	42	930	15	0
LYH-7-59	1.48	0.089	0.1543	0.0031	0.0453	0.0032	0.0704	0.0045	925	17	920	13	0.4
LYH-7-60	1.524	0.084	0.1547	0.0025	0.0493	0.0022	0.0718	0.0036	927	14	960	10	0
LYH-7-61	1.63	0.087	0.1622	0.0029	0.0529	0.0024	0.0712	0.0034	970	16	930	10	0.2
LYH-7-62	1.659	0.074	0.1654	0.0026	0.0535	0.0023	0.0728	0.0032	987	15	973	91	0.4
LYH-7-63	1.653	0.046	0.1657	0.0022	0.046	0.0039	0.0713	0.0019	989	12	958	54	0.3
LYH-7-64	1.7	0.21	0.173	0.0076	0.054	0.011	0.0698	0.0086	1028	42	940	31	0
LYH-7-65	1.84	0.38	0.1734	0.0085	0.0515	0.0071	0.076	0.014	1030	47	930	40	0
LYH-7-66	1.89	0.55	0.178	0.019	0.051	0.011	0.079	0.026	1050	10	960	68	0
LYH-7-67	1.87	0.24	0.178	0.005	0.0692	0.0076	0.0741	0.0089	1055	27	930	25	0
LYH-7-68	1.87	0.26	0.1782	0.0078	0.0506	0.0063	0.076	0.01	1063	41	1030	27	0
LYH-7-69	1.96	0.23	0.1837	0.0079	0.0651	0.0093	0.077	0.01	1087	43	1020	28	0.3
LYH-7-70	1.98	0.19	0.1841	0.0056	0.0584	0.0043	0.0767	0.0069	1088	30	1010	19	0.2
LYH-7-71	2.38	0.55	0.206	0.014	0.062	0.014	0.083	0.02	1209	77	1120	56	0.1
LYH-7-72	2.7	0.34	0.2302	0.0091	0.0521	0.0052	0.085	0.011	1334	48	1330	24	0.4
LYH-7-73	2.82	0.2	0.2354	0.0093	0.0686	0.0063	0.0857	0.0053	1362	48	1330	12	0.2
LYH-7-74	2.98	0.29	0.2373	0.0082	0.0597	0.0069	0.0903	0.0078	1371	43	1480	10	0.1
LYH-7-75	2.99	0.32	0.2378	0.0087	0.0637	0.0058	0.0897	0.0086	1374	45	1350	19	0.1
LYH-7-76	3.08	0.21	0.242	0.01	0.0862	0.0068	0.0917	0.0042	1390	52	1427	87	0.3
LYH-7-77	3.5	1.2	0.26	0.014	0.0594	0.0051	0.101	0.035	1489	73	1440	77	0.1
LYH-7-78	3.84	0.13	0.2792	0.0031	0.0784	0.0027	0.0979	0.0031	1586	16	1568	59	0.3
LYH-7-79	3.95	0.48	0.28	0.01	0.0847	0.0062	0.099	0.01	1589	50	1610	20	0.3
LYH-7-80	4.04	0.48	0.2844	0.0095	0.0835	0.0068	0.099	0.01	1612	48	1610	22	0.1
LYH-7-81	4.01	0.14	0.2885	0.004	0.0859	0.0029	0.0997	0.0034	1633	20	1632	64	0.1
LYH-7-82	4.19	0.42	0.2921	0.0073	0.0889	0.0081	0.1047	0.0096	1651	36	1630	18	0.1
LYH-7-83	4.13	0.12	0.293	0.0027	0.0835	0.0039	0.1022	0.0027	1657	13	1654	50	0.2
LYH-7-84	4.83	0.97	0.309	0.014	0.087	0.011	0.114	0.02	1733	68	1730	33	0.4
LYH-7-85	4.57	0.19	0.3108	0.0062	0.0904	0.0039	0.1077	0.0042	1743	31	1737	71	0.1
LYH-7-86	5.29	0.33	0.3346	0.0096	0.0868	0.007	0.1137	0.0069	1857	46	1780	11	0.1
LYH-7-87	5.9	1.4	0.348	0.026	0.085	0.022	0.118	0.025	1920	12	1810	41	0
LYH-7-88	6.5	1.5	0.368	0.043	0.067	0.03	0.128	0.019	2010	20	2040	27	0
LYH-7-89	6.9	0.79	0.383	0.026	0.125	0.015	0.133	0.017	2090	12	2120	22	0
LYH-7-90	6.9	0.43	0.3859	0.0082	0.114	0.0068	0.1303	0.0077	2101	38	2080	10	0
LYH-7-91	8.1	2	0.405	0.021	0.117	0.016	0.141	0.03	2189	95	2130	37	0
LYH-7-92	8.07	0.22	0.4149	0.0071	0.1214	0.0028	0.1402	0.003	2233	33	2223	37	0.1
LYH-7-93	10.9	2.8	0.462	0.031	0.112	0.025	0.168	0.041	2440	14	2400	43	0.4
LYH-7-94	10.47	0.82	0.465	0.01	0.147	0.016	0.163	0.013	2462	44	2460	13	0.1
LYH-7-95	10.71	0.92	0.466	0.017	0.099	0.011	0.169	0.013	2482	78	2520	13	0.1
LYH-7-96	11.13	0.9	0.4764	0.0075	0.1388	0.0058	0.17	0.014	2511	33	2530	14	0.1
LYH-7-97	11.2	0.45	0.4811	0.0077	0.1363	0.0055	0.1649	0.0066	2531	33	2487	13	0
